# Supplementary material for: Maslinic Acid-Enriched Diet Decreases Intestinal Tumorigenesis in ApcMin/+ Mice through Transcriptomic and Metabolomic Reprogramming
Source: PubMed Central journal article supplement (PMC3601079; doi:10.1371/journal.pone.0059392), 2013-03-18
Supplement: pone.0059392.s001.pdf [file pone.0059392.s001.pdf]

**Table S1. Differentially expressed genes by MA treatment in the colon mucosa of APC<sup>Min/+</sup> mice**

| <b>Affimetrix ID</b> | <b>Gene Symbol</b> | <b>Gene description</b>                                     | <b>Fold change</b> | <b>Adjusted p-value</b> |
|----------------------|--------------------|-------------------------------------------------------------|--------------------|-------------------------|
| 1437438_x_at         | Pnliprp2           | pancreatic lipase-related protein 2                         | 5,8                | 0,009521                |
| 1447802_x_at         | AV099323           | expressed sequence AV099323                                 | 3,8                | 0,000000                |
| 1437812_x_at         | Ganab              | alpha glucosidase 2 alpha neutral subunit                   | 3,6                | 0,000000                |
| 1447007_at           | 1700008I05Rik      | RIKEN cDNA 1700008I05 gene                                  | 2,6                | 0,000000                |
| 1447882_x_at         | Ddx54              | DEAD (Asp-Glu-Ala-Asp) box polypeptide 54                   | 2,5                | 0,000000                |
| 1450875_at           | Gpr37              | G protein-coupled receptor 37                               | 2,5                | 0,000000                |
| 1441935_at           | Ankra2             | ankyrin repeat, family A (RFXANK-like), 2                   | 2,4                | 0,000000                |
| 1440180_x_at         | Zbtb3              | zinc finger and BTB domain containing 3                     | 2,3                | 0,000000                |
| 1440383_at           | Dclre1b            | DNA cross-link repair 1B, PSO2 homolog (S. cerevisiae)      | 2,3                | 0,000001                |
| 1420132_s_at         | Pttg1ip            | pituitary tumor-transforming 1 interacting protein          | 2,1                | 0,000003                |
| 1447902_at           | 1810013A23Rik      | RIKEN cDNA 1810013A23 gene                                  | 2,1                | 0,000000                |
| 1455792_x_at         | Ndn                | necdin                                                      | 2,1                | 0,000002                |
| 1439296_at           | Prickle3           | prickle homolog 3 (Drosophila)                              | 2,1                | 0,000000                |
| 1452538_at           | Igh-6              | immunoglobulin heavy chain 6 (heavy chain of IgM)           | 2,0                | 0,000001                |
| 1418913_at           | Bhmt2              | betaine-homocysteine methyltransferase 2                    | 2,0                | 0,000005                |
| 1419911_at           | Coro1c             | coronin, actin binding protein 1C                           | 2,0                | 0,000002                |
| 1439224_at           |                    |                                                             | 2,0                | 0,001574                |
| 1451600_s_at         | EG13909            | predicted gene, EG13909                                     | 2,0                | 0,001412                |
| 1459047_x_at         |                    |                                                             | 1,9                | 0,000004                |
| 1436383_at           | Cplx2              | complexin 2                                                 | 1,9                | 0,000000                |
| 1456120_at           | Secisbp2l          | SECIS binding protein 2-like                                | 1,9                | 0,002064                |
| 1417197_at           | Wwc2               | WW, C2 and coiled-coil domain containing 2                  | 1,9                | 0,000000                |
| 1439124_at           | Wdr91              | WD repeat domain 91                                         | 1,9                | 0,000001                |
| 1456868_at           |                    |                                                             | 1,9                | 0,000002                |
| 1440159_at           | 1700010B09Rik      | RIKEN cDNA 1700010B09 gene                                  | 1,9                | 0,000317                |
| 1420175_at           | Tax1bp1            | Tax1 (human T-cell leukemia virus type I) binding protein 1 | 1,9                | 0,000134                |
| 1422425_at           | Sprr2k             | small proline-rich protein 2K                               | 1,9                | 0,004129                |
| 1458626_at           | Nos1               | nitric oxide synthase 1, neuronal                           | 1,9                | 0,000009                |
| 1422973_a_at         | Thrsp              | thyroid hormone responsive SPOT14 homolog (Rattus)          | 1,9                | 0,000001                |
| 1439144_at           | Cwf1911            | CWF19-like 1, cell cycle control (S. pombe)                 | 1,9                | 0,000002                |
| 1425824_a_at         | Pcsk4              | proprotein convertase subtilisin/kexin type 4               | 1,8                | 0,000003                |
| 1435906_x_at         | Gbp2               | guanylate binding protein 2                                 | 1,8                | 0,003678                |
| 1438956_x_at         | Pim3               | proviral integration site 3                                 | 1,8                | 0,000032                |
| 1459115_at           |                    |                                                             | 1,8                | 0,000000                |
| 1422162_at           | Dcc                | deleted in colorectal carcinoma                             | 1,8                | 0,000002                |
| 1452481_at           | Plcb2              | phospholipase C, beta 2                                     | 1,8                | 0,000007                |
| 1441160_at           | D330050G23Rik      | RIKEN cDNA D330050G23 gene                                  | 1,8                | 0,000000                |
| 1419349_a_at         | Cyp2d9             | cytochrome P450, family 2, subfamily d, polypeptide 9       | 1,8                | 0,006830                |
| 1419975_at           | Scp2               | sterol carrier protein 2, liver                             | 1,8                | 0,000381                |

|              |               |                                                                              |     |          |
|--------------|---------------|------------------------------------------------------------------------------|-----|----------|
| 1443152_at   | Ptcd3         | pentatricopeptide repeat domain 3                                            | 1,8 | 0,000058 |
| 1447892_at   |               |                                                                              | 1,8 | 0,000034 |
| 1429983_at   | 2010002M09Rik | RIKEN cDNA 2010002M09 gene                                                   | 1,8 | 0,000010 |
| 1458250_at   | Fam13c        | family with sequence similarity 13, member C                                 | 1,8 | 0,000002 |
| 1450260_at   | Grpr          | gastrin releasing peptide receptor                                           | 1,8 | 0,008580 |
| 1423804_a_at | Idi1          | isopentenyl-diphosphate delta isomerase                                      | 1,8 | 0,005388 |
| 1439834_at   | 2400009B08Rik | RIKEN cDNA 2400009B08 gene                                                   | 1,8 | 0,000001 |
| 1455457_at   | Cyp2c54       | cytochrome P450, family 2, subfamily c, polypeptide 54                       | 1,7 | 0,000046 |
| 1456003_a_at | Slc1a4        | solute carrier family 1 (glutamate/neutral amino acid transporter), member 4 | 1,7 | 0,000006 |
| 1459243_at   | 100042016     | predicted gene, 100042016                                                    | 1,7 | 0,000258 |
| 1440642_at   | D630042P16Rik | RIKEN cDNA D630042P16 gene                                                   | 1,7 | 0,000005 |
| 1443827_x_at | Fam20c        | family with sequence similarity 20, member C                                 | 1,7 | 0,000069 |
| 1438615_x_at | 2010317E24Rik | RIKEN cDNA 2010317E24 gene                                                   | 1,7 | 0,000000 |
| 1439404_x_at | Zfx           | zinc finger protein X-linked                                                 | 1,7 | 0,000025 |
| 1441840_x_at | Sbno2         | strawberry notch homolog 2 (Drosophila)                                      | 1,7 | 0,000002 |
| 1442027_at   | Nbeal1        | neurobeachin like 1                                                          | 1,7 | 0,000084 |
| 1451635_at   | AB056442      | cDNA sequence AB056442                                                       | 1,7 | 0,000016 |
| 1436991_x_at | Gsn           | gelsolin                                                                     | 1,7 | 0,000197 |
| 1432731_at   | 5830437K03Rik | RIKEN cDNA 5830437K03 gene                                                   | 1,7 | 0,000216 |
| 1426520_at   | Btg4          | B-cell translocation gene 4                                                  | 1,7 | 0,000015 |
| 1416023_at   | Fabp3         | fatty acid binding protein 3, muscle and heart                               | 1,7 | 0,000011 |
| 1443799_at   |               |                                                                              | 1,7 | 0,000078 |
| 1436750_a_at | Oxct1         | 3-oxoacid CoA transferase 1                                                  | 1,7 | 0,000589 |
| 1437671_x_at | Prss23        | protease, serine, 23                                                         | 1,7 | 0,001541 |
| 1459788_at   | Gpr107        | G protein-coupled receptor 107                                               | 1,7 | 0,002566 |
| 1436737_a_at | Sorbs1        | sorbin and SH3 domain containing 1                                           | 1,7 | 0,000611 |
| 1439822_at   |               |                                                                              | 1,7 | 0,000002 |
| 1423544_at   | Ptpn5         | protein tyrosine phosphatase, non-receptor type 5                            | 1,7 | 0,001058 |
| 1423635_at   | Bmp2          | bone morphogenetic protein 2                                                 | 1,7 | 0,002040 |
| 1417461_at   | Cap1          | CAP, adenylate cyclase-associated protein 1 (yeast)                          | 1,7 | 0,004914 |
| 1451547_at   | lyd           | iodotyrosine deiodinase                                                      | 1,7 | 0,008053 |
| 1460055_at   |               |                                                                              | 1,7 | 0,000055 |
| 1418623_at   | Rab2a         | RAB2A, member RAS oncogene family                                            | 1,7 | 0,000017 |
| 1444254_at   | Tns4          | tensin 4                                                                     | 1,7 | 0,000004 |
| 1439887_at   |               |                                                                              | 1,7 | 0,000619 |
| 1456701_at   | B230208H17Rik | RIKEN cDNA B230208H17 gene                                                   | 1,7 | 0,000001 |
| 1440824_at   |               |                                                                              | 1,7 | 0,000001 |
| 1455226_at   | Spnb1         | spectrin beta 1                                                              | 1,7 | 0,000066 |
| 1448301_s_at | Serpnb1a      | serine (or cysteine) peptidase inhibitor, clade B, member 1a                 | 1,7 | 0,000317 |
| 1454789_x_at | Prpf6         | PRP6 pre-mRNA splicing factor 6 homolog (yeast)                              | 1,7 | 0,000003 |
| 1431189_a_at | Fahd2a        | fumarylacetoacetate hydrolase domain containing 2A                           | 1,7 | 0,000000 |

|              |               |                                                                                       |     |          |
|--------------|---------------|---------------------------------------------------------------------------------------|-----|----------|
| 1441009_at   | 4732491K20Rik | <b>RIKEN cDNA 4732491K20 gene</b>                                                     | 1,7 | 0,000148 |
| 1458335_x_at | Urm1          | <b>ubiquitin related modifier 1 homolog (S. cerevisiae)</b>                           | 1,7 | 0,000029 |
| 1436099_at   | AI836003      | <b>expressed sequence AI836003</b>                                                    | 1,7 | 0,000036 |
| 1418069_at   | Apoc2         | <b>apolipoprotein C-II</b>                                                            | 1,7 | 0,000867 |
| 1422533_at   | Cyp51         | <b>cytochrome P450, family 51</b>                                                     | 1,7 | 0,003016 |
| 1455912_x_at | Unc45a        | <b>unc-45 homolog A (C. elegans)</b>                                                  | 1,7 | 0,000000 |
| 1449687_at   | D10Ert610e    | <b>DNA segment, Chr 10, ERATO Doi 610, expressed</b>                                  | 1,6 | 0,001949 |
| 1424014_at   | 2900092E17Rik | <b>RIKEN cDNA 2900092E17 gene</b>                                                     | 1,6 | 0,000007 |
| 1429935_at   | Lcn12         | <b>lipocalin 12</b>                                                                   | 1,6 | 0,000005 |
| 1419972_at   | Slc35a5       | <b>solute carrier family 35, member A5</b>                                            | 1,6 | 0,000001 |
| 1445125_at   | D8Ert107e     | <b>DNA segment, Chr 8, ERATO Doi 107, expressed</b>                                   | 1,6 | 0,000027 |
| 1416854_at   | Slc34a2       | <b>solute carrier family 34 (sodium phosphate), member 2</b>                          | 1,6 | 0,015000 |
| 1446978_at   |               |                                                                                       | 1,6 | 0,000011 |
| 1437140_at   | 4930412F15Rik | <b>RIKEN cDNA 4930412F15 gene</b>                                                     | 1,6 | 0,000027 |
| 1436155_at   | Nmnat2        | <b>nicotinamide nucleotide adenylyltransferase 2</b>                                  | 1,6 | 0,000116 |
| 1427267_at   | Tnrc18        | <b>trinucleotide repeat containing 18</b>                                             | 1,6 | 0,000029 |
| 1438156_x_at | Cpt1a         | <b>carnitine palmitoyltransferase 1a, liver</b>                                       | 1,6 | 0,001922 |
| 1455033_at   | Fam102b       | <b>family with sequence similarity 102, member B</b>                                  | 1,6 | 0,000012 |
| 1418113_at   | Cyp2d10       | <b>cytochrome P450, family 2, subfamily d, polypeptide 10</b>                         | 1,6 | 0,001799 |
| 1437342_x_at | Pttg1ip       | <b>pituitary tumor-transforming 1 interacting protein</b>                             | 1,6 | 0,000007 |
| 1438588_at   | Plagl1        | <b>pleiomorphic adenoma gene-like 1</b>                                               | 1,6 | 0,000017 |
| 1418602_at   | Cdh15         | <b>cadherin 15</b>                                                                    | 1,6 | 0,000025 |
| 1441026_at   | Parp4         | <b>poly (ADP-ribose) polymerase family, member 4</b>                                  | 1,6 | 0,005460 |
| 1431688_at   | LOC73899      | <b>hypothetical LOC73899</b>                                                          | 1,6 | 0,001015 |
| 1425514_at   | Pik3r1        | <b>phosphatidylinositol 3-kinase, regulatory subunit, polypeptide 1 (p85 alpha)</b>   | 1,6 | 0,000034 |
| 1456569_x_at | Gsn           | <b>gelsolin</b>                                                                       | 1,6 | 0,000037 |
| 1425848_a_at | Dusp26        | <b>dual specificity phosphatase 26 (putative)</b>                                     | 1,6 | 0,000089 |
| 1447227_at   |               |                                                                                       | 1,6 | 0,000474 |
| 1439451_x_at | Gpr172b       | <b>G protein-coupled receptor 172B</b>                                                | 1,6 | 0,000119 |
| 1445708_x_at | 3110021A11Rik | <b>RIKEN cDNA 3110021A11 gene</b>                                                     | 1,6 | 0,000029 |
| 1422320_x_at | Phxr5         | <b>per-hexamer repeat gene 5</b>                                                      | 1,6 | 0,000026 |
| 1427780_at   | Defb35        | <b>defensin beta 35</b>                                                               | 1,6 | 0,000003 |
| 1459658_at   | Mcm5          | <b>minichromosome maintenance deficient 5, cell division cycle 46 (S. cerevisiae)</b> | 1,6 | 0,000849 |
| 1423037_at   | Aplnr         | <b>apelin receptor</b>                                                                | 1,6 | 0,000295 |
| 1452460_at   | Ankrd26       | <b>ankyrin repeat domain 26</b>                                                       | 1,6 | 0,000190 |
| 1419918_at   | Tmed7         | <b>transmembrane emp24 protein transport domain containing 7</b>                      | 1,6 | 0,000864 |
| 1456397_at   | Cdh4          | <b>cadherin 4</b>                                                                     | 1,6 | 0,000576 |
| 1445556_at   |               |                                                                                       | 1,6 | 0,000049 |
| 1450361_at   | Prop1         | <b>paired like homeodomain factor 1</b>                                               | 1,6 | 0,000003 |
| 1417485_at   | lbsp          | <b>integrin binding sialoprotein</b>                                                  | 1,6 | 0,000083 |
| 1445566_at   |               |                                                                                       | 1,6 | 0,000047 |

|              |               |                                                                     |      |          |
|--------------|---------------|---------------------------------------------------------------------|------|----------|
| 1439427_at   | Cldn9         | <b>claudin 9</b>                                                    | 1,6  | 0,000003 |
| 1424386_at   | Reep2         | <b>receptor accessory protein 2</b>                                 | 1,6  | 0,000003 |
| 1433681_x_at | Capn3         | <b>calpain 3</b>                                                    | 1,6  | 0,000343 |
| 1433855_at   | Abat          | <b>4-aminobutyrate aminotransferase</b>                             | 1,6  | 0,000174 |
| 1441910_x_at | Ccne1         | <b>cyclin E1</b>                                                    | 1,6  | 0,000003 |
| 1427970_at   | Zfp689        | <b>zinc finger protein 689</b>                                      | 1,6  | 0,000043 |
| 1422904_at   | Fmo2          | <b>flavin containing monooxygenase 2</b>                            | 1,6  | 0,011499 |
| 1424722_at   | 1300017J02Rik | <b>RIKEN cDNA 1300017J02 gene</b>                                   | 1,6  | 0,000350 |
| 1435084_at   | C730049O14Rik | <b>RIKEN cDNA C730049O14 gene</b>                                   | 1,6  | 0,001418 |
| 1429427_s_at | Tcf7l2        | <b>transcription factor 7-like 2, T-cell specific, HMG-box</b>      | 1,6  | 0,003920 |
| 1419439_at   | Stk22s1       | <b>serine/threonine kinase 22 substrate 1</b>                       | 1,6  | 0,000014 |
| 1440144_x_at | C330046E03    | <b>hypothetical protein C330046E03</b>                              | 1,6  | 0,000014 |
| 1445352_at   |               |                                                                     | 1,6  | 0,000045 |
| 1456844_at   | Camk2d        | <b>calcium/calmodulin-dependent protein kinase II, delta</b>        | 1,6  | 0,002838 |
| 1445662_x_at |               |                                                                     | 1,6  | 0,000003 |
| 1436408_at   | Rprml         | <b>reprimo-like</b>                                                 | 1,6  | 0,000887 |
| 1434831_a_at | Foxo3         | <b>forkhead box O3</b>                                              | 1,6  | 0,000767 |
| 1444662_at   | Pla2g4c       | <b>phospholipase A2, group IVC (cytosolic, calcium-independent)</b> | 1,6  | 0,000069 |
| 1424610_at   | Trub2         | <b>TruB pseudouridine (psi) synthase homolog 2 (E. coli)</b>        | 1,6  | 0,000275 |
| 1434426_at   | Ncapd3        | <b>non-SMC condensin II complex, subunit D3</b>                     | 1,6  | 0,000974 |
| 1435964_a_at | Taok3         | <b>TAO kinase 3</b>                                                 | 1,6  | 0,000768 |
| 1418580_at   | Rtp4          | <b>receptor transporter protein 4</b>                               | 1,6  | 0,005278 |
| 1443792_at   | Tsga14        | <b>testis specific gene A14</b>                                     | 1,6  | 0,000189 |
| 1437171_x_at | Gsn           | <b>gelsolin</b>                                                     | 1,6  | 0,000778 |
| 1433888_at   | Atp2b2        | <b>ATPase, Ca<sup>++</sup> transporting, plasma membrane 2</b>      | 1,6  | 0,000003 |
| 1450255_at   | Cdgap         | <b>CDC42 GTPase-activating protein</b>                              | 1,6  | 0,000141 |
| 1442241_at   |               |                                                                     | -1,6 | 0,006507 |
| 1428234_at   | Cpsf6         | <b>cleavage and polyadenylation specific factor 6</b>               | -1,6 | 0,002954 |
| 1447062_at   |               |                                                                     | -1,6 | 0,000054 |
| 1434507_at   | Npepl1        | <b>aminopeptidase-like 1</b>                                        | -1,6 | 0,000041 |
| 1434807_s_at | Mtx3          | <b>metaxin 3</b>                                                    | -1,6 | 0,000388 |
| 1416835_s_at | Amd1          | <b>S-adenosylmethionine decarboxylase 1</b>                         | -1,6 | 0,001681 |
| 1426232_at   | BC024479      | <b>cDNA sequence BC024479</b>                                       | -1,6 | 0,008209 |
| 1433430_s_at | Cdc23         | <b>CDC23 (cell division cycle 23, yeast, homolog)</b>               | -1,6 | 0,000190 |
| 1441362_at   |               |                                                                     | -1,6 | 0,000106 |
| 1451182_s_at | Ankrd54       | <b>ankyrin repeat domain 54</b>                                     | -1,6 | 0,000038 |
| 1456327_at   |               |                                                                     | -1,6 | 0,005953 |
| 1428689_at   | Tysnd1        | <b>trypsin domain containing 1</b>                                  | -1,6 | 0,000005 |
| 1449186_at   | Bag4          | <b>BCL2-associated athanogene 4</b>                                 | -1,6 | 0,000052 |
| 1440715_s_at | Cdkn2aipnl    | <b>CDKN2A interacting protein N-terminal like</b>                   | -1,6 | 0,005335 |
| 1418340_at   | Fcer1g        | <b>Fc receptor, IgE, high affinity I, gamma polypeptide</b>         | -1,6 | 0,000389 |

|              |               |                                                                                                 |             |          |
|--------------|---------------|-------------------------------------------------------------------------------------------------|-------------|----------|
| 1437410_at   | Aldh2         | <b>aldehyde dehydrogenase 2, mitochondrial</b>                                                  | <b>-1,6</b> | 0,003684 |
| 1451794_at   | Tmcc3         | <b>transmembrane and coiled coil domains 3</b>                                                  | <b>-1,6</b> | 0,005110 |
| 1427580_a_at | Rian          | <b>RNA imprinted and accumulated in nucleus</b>                                                 | <b>-1,6</b> | 0,002773 |
| 1439819_at   | AU015263      | <b>expressed sequence AU015263</b>                                                              | <b>-1,6</b> | 0,008601 |
| 1430144_at   | Avl9          | <b>AVL9 homolog (S. cerevisiae)</b>                                                             | <b>-1,6</b> | 0,004688 |
| 1442989_at   |               |                                                                                                 | <b>-1,6</b> | 0,000046 |
| 1443331_at   |               |                                                                                                 | <b>-1,6</b> | 0,000068 |
| 1418528_a_at | Dad1          | <b>defender against cell death 1</b>                                                            | <b>-1,6</b> | 0,001564 |
| 1452676_a_at | Pnpt1         | <b>polyribonucleotide nucleotidyltransferase 1</b>                                              | <b>-1,6</b> | 0,012741 |
| 1420142_s_at | Pa2g4         | <b>proliferation-associated 2G4</b>                                                             | <b>-1,6</b> | 0,000783 |
| 1433174_a_at | 5430440L12Rik | <b>RIKEN cDNA 5430440L12 gene</b>                                                               | <b>-1,6</b> | 0,000295 |
| 1455863_at   | Spata5l1      | <b>spermatogenesis associated 5-like 1</b>                                                      | <b>-1,6</b> | 0,000953 |
| 1417716_at   | Got2          | <b>glutamate oxaloacetate transaminase 2, mitochondrial</b>                                     | <b>-1,6</b> | 0,000002 |
| 1428707_at   | Ptms          | <b>parathyrosin</b>                                                                             | <b>-1,6</b> | 0,000003 |
| 1423795_at   | Sfpq          | <b>splicing factor proline/glutamine rich (polypyrimidine tract binding protein associated)</b> | <b>-1,6</b> | 0,003932 |
| 1454842_a_at | B3galnt2      | <b>UDP-GalNAc:betaGlcNAc beta 1,3-galactosaminyltransferase, polypeptide 2</b>                  | <b>-1,6</b> | 0,009871 |
| 1439797_at   | Ppard         | <b>peroxisome proliferator activator receptor delta</b>                                         | <b>-1,6</b> | 0,001178 |
| 1460678_at   | Klhdc2        | <b>kelch domain containing 2</b>                                                                | <b>-1,6</b> | 0,000825 |
| 1429725_at   | Zfx3          | <b>zinc finger homeobox 3</b>                                                                   | <b>-1,6</b> | 0,000181 |
| 1434493_at   | 1810022K09Rik | <b>RIKEN cDNA 1810022K09 gene</b>                                                               | <b>-1,6</b> | 0,010362 |
| 1451127_at   | AW146242      | <b>expressed sequence AW146242</b>                                                              | <b>-1,6</b> | 0,000286 |
| 1425204_s_at | Ddx19a        | <b>DEAD (Asp-Glu-Ala-Asp) box polypeptide 19a</b>                                               | <b>-1,6</b> | 0,000078 |
| 1429180_at   | Gmpr2         | <b>guanosine monophosphate reductase 2</b>                                                      | <b>-1,6</b> | 0,010788 |
| 1425551_at   | Hip1r         | <b>huntingtin interacting protein 1 related</b>                                                 | <b>-1,6</b> | 0,000366 |
| 1444478_at   | Appl1         | <b>adaptor protein, phosphotyrosine interaction, PH domain and leucine zipper containing 1</b>  | <b>-1,6</b> | 0,002613 |
| 1422779_at   | Smpd3         | <b>sphingomyelin phosphodiesterase 3, neutral</b>                                               | <b>-1,6</b> | 0,000134 |
| 1418596_at   | Fgfr4         | <b>fibroblast growth factor receptor 4</b>                                                      | <b>-1,6</b> | 0,000096 |
| 1416487_a_at | Yap1          | <b>yes-associated protein 1</b>                                                                 | <b>-1,6</b> | 0,000094 |
| 1456386_at   |               |                                                                                                 | <b>-1,6</b> | 0,000602 |
| 1418253_a_at | Hspa4l        | <b>heat shock protein 4 like</b>                                                                | <b>-1,6</b> | 0,000243 |
| 1430415_at   | Phf6          | <b>PHD finger protein 6</b>                                                                     | <b>-1,6</b> | 0,001624 |
| 1444459_at   |               |                                                                                                 | <b>-1,6</b> | 0,002404 |
| 1458031_at   |               |                                                                                                 | <b>-1,6</b> | 0,000008 |
| 1431374_at   | 6330407A03Rik | <b>RIKEN cDNA 6330407A03 gene</b>                                                               | <b>-1,6</b> | 0,000642 |
| 1448140_at   | Ciapin1       | <b>cytokine induced apoptosis inhibitor 1</b>                                                   | <b>-1,6</b> | 0,000431 |
| 1428429_at   | Rgmb          | <b>RGM domain family, member B</b>                                                              | <b>-1,6</b> | 0,000709 |
| 1440234_at   | 1810012P15Rik | <b>RIKEN cDNA 1810012P15 gene</b>                                                               | <b>-1,6</b> | 0,000031 |
| 1425315_at   | Dock7         | <b>dedicator of cytokinesis 7</b>                                                               | <b>-1,6</b> | 0,000952 |
| 1446447_at   |               |                                                                                                 | <b>-1,6</b> | 0,000056 |
| 1424923_at   | Serpina3g     | <b>serine (or cysteine) peptidase inhibitor, clade A, member 3G</b>                             | <b>-1,6</b> | 0,013360 |
| 1449157_at   | Nr2c1         | <b>nuclear receptor subfamily 2, group C, member 1</b>                                          | <b>-1,6</b> | 0,000048 |

|              |               |                                                                                                  |             |          |
|--------------|---------------|--------------------------------------------------------------------------------------------------|-------------|----------|
| 1448668_a_at | Irak1         | <b>interleukin-1 receptor-associated kinase 1</b>                                                | <b>-1,6</b> | 0,000017 |
| 1423617_at   | Pdf           | <b>peptide deformylase (mitochondrial)</b>                                                       | <b>-1,6</b> | 0,000105 |
| 1424197_s_at | Fance         | <b>Fanconi anemia, complementation group E</b>                                                   | <b>-1,6</b> | 0,000018 |
| 1435325_at   | Usp46         | <b>ubiquitin specific peptidase 46</b>                                                           | <b>-1,6</b> | 0,000334 |
| 1456250_x_at | Tgfb1         | <b>transforming growth factor, beta induced</b>                                                  | <b>-1,6</b> | 0,001768 |
| 1441112_at   | LOC667118     | <b>similar to Zinc finger BED domain containing protein 4</b>                                    | <b>-1,6</b> | 0,006783 |
| 1443649_at   |               |                                                                                                  | <b>-1,6</b> | 0,001631 |
| 1428749_at   | Dmxl2         | <b>Dmx-like 2</b>                                                                                | <b>-1,6</b> | 0,001329 |
| 1453251_at   | Dhx30         | <b>DEAH (Asp-Glu-Ala-His) box polypeptide 30</b>                                                 | <b>-1,6</b> | 0,001845 |
| 1443628_at   |               |                                                                                                  | <b>-1,6</b> | 0,000866 |
| 1426025_s_at | Laptm5        | <b>lysosomal-associated protein transmembrane 5</b>                                              | <b>-1,6</b> | 0,000056 |
| 1423053_at   | Arf4          | <b>ADP-ribosylation factor 4</b>                                                                 | <b>-1,6</b> | 0,000010 |
| 1432384_a_at | Mettl6        | <b>methyltransferase like 6</b>                                                                  | <b>-1,6</b> | 0,002797 |
| 1439201_at   | Usp14         | <b>ubiquitin specific peptidase 14</b>                                                           | <b>-1,6</b> | 0,000053 |
| 1440068_at   |               |                                                                                                  | <b>-1,6</b> | 0,000192 |
| 1417311_at   | Crip2         | <b>cysteine rich protein 2</b>                                                                   | <b>-1,6</b> | 0,004015 |
| 1451091_at   | Txnrc5        | <b>thioredoxin domain containing 5</b>                                                           | <b>-1,6</b> | 0,000150 |
| 1458812_at   |               |                                                                                                  | <b>-1,6</b> | 0,000288 |
| 1438725_at   | Med13         | <b>mediator complex subunit 13</b>                                                               | <b>-1,6</b> | 0,000222 |
| 1448585_at   | Gtf2h4        | <b>general transcription factor II H, polypeptide 4</b>                                          | <b>-1,6</b> | 0,000156 |
| 1429368_at   | Lrig3         | <b>leucine-rich repeats and immunoglobulin-like domains 3</b>                                    | <b>-1,6</b> | 0,000424 |
| 1440690_at   |               |                                                                                                  | <b>-1,6</b> | 0,001323 |
| 1418440_at   | Col8a1        | <b>collagen, type VIII, alpha 1</b>                                                              | <b>-1,6</b> | 0,006082 |
| 1452381_at   | Creb3l2       | <b>cAMP responsive element binding protein 3-like 2</b>                                          | <b>-1,6</b> | 0,009036 |
| 1453228_at   | Stx11         | <b>syntaxin 11</b>                                                                               | <b>-1,6</b> | 0,000271 |
| 1456927_at   | Mast2         | <b>microtubule associated serine/threonine kinase 2</b>                                          | <b>-1,6</b> | 0,004584 |
| 1456933_at   |               |                                                                                                  | <b>-1,6</b> | 0,003023 |
| 1439622_at   | Rassf4        | <b>Ras association (RalGDS/AF-6) domain family member 4</b>                                      | <b>-1,6</b> | 0,000859 |
| 1429504_at   | Rnpc3         | <b>RNA-binding region (RNP1, RRM) containing 3</b>                                               | <b>-1,6</b> | 0,011502 |
| 1457641_at   |               |                                                                                                  | <b>-1,6</b> | 0,000869 |
| 1415888_at   | Hdgf          | <b>hepatoma-derived growth factor</b>                                                            | <b>-1,6</b> | 0,000281 |
| 1420817_at   | Ywhag         | <b>tyrosine 3-monooxygenase/tryptophan 5-monooxygenase activation protein, gamma polypeptide</b> | <b>-1,6</b> | 0,000073 |
| 1441033_at   | Tmtc2         | <b>transmembrane and tetratricopeptide repeat containing 2</b>                                   | <b>-1,6</b> | 0,000172 |
| 1452182_at   | Galnt2        | <b>UDP-N-acetyl-alpha-D-galactosamine:polypeptide N-acetylgalactosaminyltransferase 2</b>        | <b>-1,6</b> | 0,000001 |
| 1423345_at   | Degs1         | <b>degenerative spermatocyte homolog 1 (Drosophila)</b>                                          | <b>-1,6</b> | 0,000035 |
| 1426575_at   | Sgms1         | <b>sphingomyelin synthase 1</b>                                                                  | <b>-1,6</b> | 0,000448 |
| 1442511_at   | Ipo7          | <b>importin 7</b>                                                                                | <b>-1,6</b> | 0,015435 |
| 1430996_at   | Etnk1         | <b>ethanolamine kinase 1</b>                                                                     | <b>-1,6</b> | 0,001020 |
| 1451391_at   | 2700050L05Rik | <b>RIKEN cDNA 2700050L05 gene</b>                                                                | <b>-1,6</b> | 0,000963 |
| 1452869_at   | Prpf38b       | <b>PRP38 pre-mRNA processing factor 38 (yeast) domain containing B</b>                           | <b>-1,6</b> | 0,002673 |
| 1430108_at   | 9030622M22Rik | <b>RIKEN cDNA 9030622M22 gene</b>                                                                | <b>-1,6</b> | 0,000041 |

|              |               |                                                                                      |             |          |
|--------------|---------------|--------------------------------------------------------------------------------------|-------------|----------|
| 1439974_at   | Fkbp15        | <b>FK506 binding protein 15</b>                                                      | <b>-1,6</b> | 0,003129 |
| 1432207_a_at | Toe1          | <b>target of EGR1, member 1 (nuclear)</b>                                            | <b>-1,6</b> | 0,000064 |
| 1423982_at   | Fusip1        | <b>FUS interacting protein (serine-arginine rich) 1</b>                              | <b>-1,6</b> | 0,005725 |
| 1458969_at   | AU019559      | <b>expressed sequence AU019559</b>                                                   | <b>-1,6</b> | 0,000659 |
| 1450264_a_at | Chka          | <b>choline kinase alpha</b>                                                          | <b>-1,6</b> | 0,000606 |
| 1423321_at   | Myadm         | <b>myeloid-associated differentiation marker</b>                                     | <b>-1,6</b> | 0,000014 |
| 1418925_at   | Celsr1        | <b>cadherin, EGF LAG seven-pass G-type receptor 1 (flamingo homolog, Drosophila)</b> | <b>-1,6</b> | 0,000053 |
| 1438442_at   | 5730470L24Rik | <b>RIKEN cDNA 5730470L24 gene</b>                                                    | <b>-1,6</b> | 0,000385 |
| 1458737_at   | C77097        | <b>expressed sequence C77097</b>                                                     | <b>-1,6</b> | 0,004714 |
| 1424232_a_at | Ftsjd1        | <b>FtsJ methyltransferase domain containing 1</b>                                    | <b>-1,6</b> | 0,000011 |
| 1448794_s_at | Dnajc2        | <b>DnaJ (Hsp40) homolog, subfamily C, member 2</b>                                   | <b>-1,6</b> | 0,006114 |
| 1438454_at   | B430203M17Rik | <b>RIKEN cDNA B430203M17 gene</b>                                                    | <b>-1,6</b> | 0,001666 |
| 1429586_at   | 4930558N01Rik | <b>RIKEN cDNA 4930558N01 gene</b>                                                    | <b>-1,6</b> | 0,000029 |
| 1443156_at   |               |                                                                                      | <b>-1,6</b> | 0,002082 |
| 1442494_at   | Ubr2          | <b>ubiquitin protein ligase E3 component n-recogin 2</b>                             | <b>-1,6</b> | 0,002266 |
| 1418222_at   | 2610024G14Rik | <b>RIKEN cDNA 2610024G14 gene</b>                                                    | <b>-1,6</b> | 0,000299 |
| 1441253_at   |               |                                                                                      | <b>-1,6</b> | 0,013109 |
| 1448500_a_at | Lime1         | <b>Lck interacting transmembrane adaptor 1</b>                                       | <b>-1,6</b> | 0,008299 |
| 1443068_at   | D130084N16Rik | <b>RIKEN cDNA D130084N16 gene</b>                                                    | <b>-1,6</b> | 0,004081 |
| 1452020_a_at | Siva1         | <b>SIVA1, apoptosis-inducing factor</b>                                              | <b>-1,6</b> | 0,001373 |
| 1417602_at   | Per2          | <b>period homolog 2 (Drosophila)</b>                                                 | <b>-1,6</b> | 0,000205 |
| 1429359_s_at | Rbpms         | <b>RNA binding protein gene with multiple splicing</b>                               | <b>-1,6</b> | 0,015601 |
| 1415689_s_at | Zkscan3       | <b>zinc finger with KRAB and SCAN domains 3</b>                                      | <b>-1,6</b> | 0,000827 |
| 1439787_at   | P2rx7         | <b>purinergic receptor P2X, ligand-gated ion channel, 7</b>                          | <b>-1,6</b> | 0,000070 |
| 1425424_at   | MGC7817       | <b>hypothetical protein LOC620031</b>                                                | <b>-1,6</b> | 0,000408 |
| 1450480_a_at | Grk6          | <b>G protein-coupled receptor kinase 6</b>                                           | <b>-1,6</b> | 0,000083 |
| 1458602_at   | Bbx           | <b>bobby sox homolog (Drosophila)</b>                                                | <b>-1,6</b> | 0,000106 |
| 1439953_at   | Pmm2          | <b>phosphomannomutase 2</b>                                                          | <b>-1,6</b> | 0,000711 |
| 1425348_a_at | Srprb         | <b>signal recognition particle receptor, B subunit</b>                               | <b>-1,6</b> | 0,000077 |
| 1417807_at   | Ufsp1         | <b>UFM1-specific peptidase 1</b>                                                     | <b>-1,6</b> | 0,000070 |
| 1460548_a_at | Eral1         | <b>Era (G-protein)-like 1 (E. coli)</b>                                              | <b>-1,6</b> | 0,000297 |
| 1456413_at   | Pde4dip       | <b>phosphodiesterase 4D interacting protein (myomegalin)</b>                         | <b>-1,6</b> | 0,002884 |
| 1456476_at   | Atxn2l        | <b>ataxin 2-like</b>                                                                 | <b>-1,6</b> | 0,000106 |
| 1456897_at   |               |                                                                                      | <b>-1,6</b> | 0,000874 |
| 1429963_at   | Mapk6         | <b>mitogen-activated protein kinase 6</b>                                            | <b>-1,6</b> | 0,000619 |
| 1453051_at   | Zkscan1       | <b>zinc finger with KRAB and SCAN domains 1</b>                                      | <b>-1,6</b> | 0,000001 |
| 1440635_at   | Palld         | <b>palladin, cytoskeletal associated protein</b>                                     | <b>-1,6</b> | 0,002672 |
| 1418475_at   | Scnn1b        | <b>sodium channel, nonvoltage-gated 1 beta</b>                                       | <b>-1,6</b> | 0,003407 |
| 1430992_s_at | Cisd2         | <b>CDGSH iron sulfur domain 2</b>                                                    | <b>-1,6</b> | 0,000044 |
| 1451591_a_at | Efnb1         | <b>ephrin B1</b>                                                                     | <b>-1,6</b> | 0,000594 |
| 1428100_at   | Sfrs1         | <b>splicing factor, arginine/serine-rich 1 (ASF/SF2)</b>                             | <b>-1,6</b> | 0,001974 |

|              |               |                                                                 |             |          |
|--------------|---------------|-----------------------------------------------------------------|-------------|----------|
| 1448691_at   | Ubqln4        | <b>ubiquilin 4</b>                                              | <b>-1,6</b> | 0,000001 |
| 1443630_at   |               |                                                                 | <b>-1,6</b> | 0,000308 |
| 1447465_at   |               |                                                                 | <b>-1,6</b> | 0,000011 |
| 1426764_at   | Oaz2          | <b>ornithine decarboxylase antizyme 2</b>                       | <b>-1,6</b> | 0,000100 |
| 1455135_at   | Ccdc9         | <b>coiled-coil domain containing 9</b>                          | <b>-1,6</b> | 0,000093 |
| 1443162_at   |               |                                                                 | <b>-1,6</b> | 0,000350 |
| 1419247_at   | Rgs2          | <b>regulator of G-protein signaling 2</b>                       | <b>-1,6</b> | 0,000247 |
| 1440009_at   | Olfr78        | <b>olfactory receptor 78</b>                                    | <b>-1,6</b> | 0,010247 |
| 1420866_at   | Zfp161        | <b>zinc finger protein 161</b>                                  | <b>-1,6</b> | 0,000075 |
| 1460366_at   | Eml3          | <b>echinoderm microtubule associated protein like 3</b>         | <b>-1,6</b> | 0,000046 |
| 1426744_at   | Sreb2         | <b>sterol regulatory element binding factor 2</b>               | <b>-1,6</b> | 0,000002 |
| 1451927_a_at | Mapk14        | <b>mitogen-activated protein kinase 14</b>                      | <b>-1,6</b> | 0,004047 |
| 1436305_at   | Rnf217        | <b>ring finger protein 217</b>                                  | <b>-1,6</b> | 0,000080 |
| 1443148_at   |               |                                                                 | <b>-1,6</b> | 0,001245 |
| 1436665_a_at | Ltbp4         | <b>latent transforming growth factor beta binding protein 4</b> | <b>-1,6</b> | 0,001262 |
| 1425118_at   | Spire2        | <b>spire homolog 2 (Drosophila)</b>                             | <b>-1,6</b> | 0,001311 |
| 1451667_at   | Fam20b        | <b>family with sequence similarity 20, member B</b>             | <b>-1,6</b> | 0,003868 |
| 1423879_at   | D030056L22Rik | <b>RIKEN cDNA D030056L22 gene</b>                               | <b>-1,6</b> | 0,000213 |
| 1455208_at   | Pex19         | <b>peroxisomal biogenesis factor 19</b>                         | <b>-1,6</b> | 0,000053 |
| 1435923_at   | Ado           | <b>2-aminoethanethiol (cysteamine) dioxygenase</b>              | <b>-1,6</b> | 0,000536 |
| 1423450_a_at | Hs3st1        | <b>heparan sulfate (glucosamine) 3-O-sulfotransferase 1</b>     | <b>-1,6</b> | 0,000054 |
| 1417254_at   | Spata5        | <b>spermatogenesis associated 5</b>                             | <b>-1,6</b> | 0,000965 |
| 1455439_a_at | Lgals1        | <b>lectin, galactose binding, soluble 1</b>                     | <b>-1,6</b> | 0,007017 |
| 1419403_at   | BC017612      | <b>cDNA sequence BC017612</b>                                   | <b>-1,6</b> | 0,000869 |
| 1425845_a_at | Shoc2         | <b>soc-2 (suppressor of clear) homolog (C. elegans)</b>         | <b>-1,6</b> | 0,000008 |
| 1416657_at   | Akt1          | <b>thymoma viral proto-oncogene 1</b>                           | <b>-1,6</b> | 0,000003 |
| 1426790_at   | Ssrp1         | <b>structure specific recognition protein 1</b>                 | <b>-1,6</b> | 0,000492 |
| 1434282_at   | Ibtk          | <b>inhibitor of Bruton agammaglobulinemia tyrosine kinase</b>   | <b>-1,6</b> | 0,000075 |
| 1442704_at   |               |                                                                 | <b>-1,6</b> | 0,001341 |
| 1434133_s_at | Wdr42a        | <b>WD repeat domain 42A</b>                                     | <b>-1,6</b> | 0,000029 |
| 1430175_at   | 4930588G05Rik | <b>RIKEN cDNA 4930588G05 gene</b>                               | <b>-1,6</b> | 0,001061 |
| 1451538_at   | Sox9          | <b>SRY-box containing gene 9</b>                                | <b>-1,6</b> | 0,001053 |
| 1435916_at   | Zfp84         | <b>zinc finger protein 84</b>                                   | <b>-1,6</b> | 0,002291 |
| 1433506_at   | Lrrc8d        | <b>leucine rich repeat containing 8D</b>                        | <b>-1,6</b> | 0,000309 |
| 1451099_at   | Mbc2          | <b>membrane bound C2 domain containing protein</b>              | <b>-1,6</b> | 0,000074 |
| 1443593_at   |               |                                                                 | <b>-1,6</b> | 0,001363 |
| 1434404_at   | Fam73a        | <b>family with sequence similarity 73, member A</b>             | <b>-1,6</b> | 0,005473 |
| 1449122_at   | Ubx2b         | <b>UBX domain protein 2B</b>                                    | <b>-1,6</b> | 0,001017 |
| 1427417_at   | Scml4         | <b>sex comb on midleg-like 4 (Drosophila)</b>                   | <b>-1,6</b> | 0,001056 |
| 1454743_at   | Nup205        | <b>nucleoporin 205</b>                                          | <b>-1,6</b> | 0,004080 |
| 1445885_at   | Ube2d2        | <b>ubiquitin-conjugating enzyme E2D 2</b>                       | <b>-1,6</b> | 0,001509 |



|              |               |                                                                                      |      |          |
|--------------|---------------|--------------------------------------------------------------------------------------|------|----------|
| 1459648_at   |               |                                                                                      | -1,6 | 0,000043 |
| 1422793_at   | Pafah1b2      | platelet-activating factor acetylhydrolase, isoform 1b, alpha2 subunit               | -1,6 | 0,000651 |
| 1458205_at   |               |                                                                                      | -1,6 | 0,001652 |
| 1428174_x_at | Khsrp         | <b>KH-type splicing regulatory protein</b>                                           | -1,6 | 0,000011 |
| 1451644_a_at | H2-gs10       | <b>MHC class I like protein GS10</b>                                                 | -1,6 | 0,004917 |
| 1451514_at   | Usp43         | <b>ubiquitin specific peptidase 43</b>                                               | -1,6 | 0,000005 |
| 1421784_a_at | Efna4         | <b>ephrin A4</b>                                                                     | -1,6 | 0,014561 |
| 1422551_at   | Zkscan3       | <b>zinc finger with KRAB and SCAN domains 3</b>                                      | -1,6 | 0,000124 |
| 1447575_at   |               |                                                                                      | -1,6 | 0,000038 |
| 1426945_at   | Ipo5          | <b>importin 5</b>                                                                    | -1,6 | 0,000623 |
| 1458974_at   |               |                                                                                      | -1,6 | 0,000017 |
| 1429464_at   | Prkaa2        | <b>protein kinase, AMP-activated, alpha 2 catalytic subunit</b>                      | -1,6 | 0,005457 |
| 1428168_at   | Mpzl1         | <b>myelin protein zero-like 1</b>                                                    | -1,6 | 0,001206 |
| 1416548_at   | Slc35b4       | <b>solute carrier family 35, member B4</b>                                           | -1,6 | 0,000021 |
| 1458290_at   |               |                                                                                      | -1,6 | 0,002360 |
| 1456209_x_at |               |                                                                                      | -1,6 | 0,001079 |
| 1437491_at   | Bicd2         | <b>bicaudal D homolog 2 (Drosophila)</b>                                             | -1,6 | 0,000012 |
| 1427153_at   | Bckdhb        | <b>branched chain ketoacid dehydrogenase E1, beta polypeptide</b>                    | -1,6 | 0,008209 |
| 1418284_at   | Vps72         | <b>vacuolar protein sorting 72 (yeast)</b>                                           | -1,6 | 0,000001 |
| 1422532_at   | Xpc           | <b>xeroderma pigmentosum, complementation group C</b>                                | -1,6 | 0,000014 |
| 1441732_at   |               |                                                                                      | -1,6 | 0,009311 |
| 1448623_at   | Tmem123       | <b>transmembrane protein 123</b>                                                     | -1,6 | 0,006826 |
| 1430515_s_at | Aasdhppt      | <b>aminoadipate-semialdehyde dehydrogenase-phosphopantetheinyl transferase</b>       | -1,6 | 0,006239 |
| 1457334_at   | C130057M05Rik | <b>RIKEN cDNA C130057M05 gene</b>                                                    | -1,6 | 0,000352 |
| 1424078_s_at | Pex6          | <b>peroxisomal biogenesis factor 6</b>                                               | -1,6 | 0,000184 |
| 1449504_at   | Kpna1         | <b>karyopherin (importin) alpha 1</b>                                                | -1,6 | 0,000323 |
| 1434680_at   | Plekhg3       | <b>pleckstrin homology domain containing, family G (with RhoGef domain) member 3</b> | -1,6 | 0,000003 |
| 1450519_a_at | Prkaca        | <b>protein kinase, cAMP dependent, catalytic, alpha</b>                              | -1,6 | 0,000064 |
| 1427476_a_at | Trim32        | <b>tripartite motif-containing 32</b>                                                | -1,6 | 0,000190 |
| 1443905_at   |               |                                                                                      | -1,6 | 0,002877 |
| 1429846_at   | 9030411K21Rik | <b>RIKEN cDNA 9030411K21 gene</b>                                                    | -1,6 | 0,000719 |
| 1426781_at   | Tyw1          | <b>tRNA-yW synthesizing protein 1 homolog (S. cerevisiae)</b>                        | -1,6 | 0,000242 |
| 1421908_a_at | Tcf12         | <b>transcription factor 12</b>                                                       | -1,6 | 0,000532 |
| 1444827_at   |               |                                                                                      | -1,6 | 0,001417 |
| 1455065_x_at | Gnpda1        | <b>glucosamine-6-phosphate deaminase 1</b>                                           | -1,6 | 0,001509 |
| 1417551_at   | Cln3          | <b>ceroid lipofuscinosis, neuronal 3, juvenile (Batten, Spielmeyer-Vogt disease)</b> | -1,6 | 0,000472 |
| 1448392_at   | Sparc         | <b>secreted acidic cysteine rich glycoprotein</b>                                    | -1,6 | 0,012991 |
| 1419072_at   | Gstm7         | <b>glutathione S-transferase, mu 7</b>                                               | -1,6 | 0,000164 |
| 1448446_at   | Deaf1         | <b>deformed epidermal autoregulatory factor 1 (Drosophila)</b>                       | -1,6 | 0,000021 |
| 1449523_at   | Bcl7c         | <b>B-cell CLL/lymphoma 7C</b>                                                        | -1,6 | 0,000001 |
| 1418118_at   | Slc22a1       | <b>solute carrier family 22 (organic cation transporter), member 1</b>               | -1,6 | 0,000162 |

|              |               |                                                      |      |          |
|--------------|---------------|------------------------------------------------------|------|----------|
| 1426518_at   | Tubgcp5       | tubulin, gamma complex associated protein 5          | -1,6 | 0,000229 |
| 1417753_at   | Pkd2          | polycystic kidney disease 2                          | -1,6 | 0,002062 |
| 1426548_a_at | Atpbd4        | ATP binding domain 4                                 | -1,6 | 0,012039 |
| 1416075_at   | Sav1          | salvador homolog 1 (Drosophila)                      | -1,6 | 0,000002 |
| 1436007_a_at | Thumpd1       | THUMP domain containing 1                            | -1,6 | 0,001071 |
| 1438419_at   | Rbm16         | RNA binding motif protein 16                         | -1,6 | 0,001261 |
| 1449947_s_at | Zfhx3         | zinc finger homeobox 3                               | -1,6 | 0,013826 |
| 1452831_s_at | Ppat          | phosphoribosyl pyrophosphate amidotransferase        | -1,6 | 0,013337 |
| 1421052_a_at | Sms           | spermine synthase                                    | -1,6 | 0,000663 |
| 1452099_at   | AA408296      | expressed sequence AA408296                          | -1,6 | 0,001646 |
| 1444705_at   |               |                                                      | -1,6 | 0,000240 |
| 1417606_a_at | Calr          | calreticulin                                         | -1,6 | 0,000014 |
| 1424201_a_at | Seh1l         | SEH1-like (S. cerevisiae)                            | -1,6 | 0,000140 |
| 1422993_s_at | Refbp2        | RNA and export factor binding protein 2              | -1,6 | 0,009750 |
| 1416235_at   | Lrrc59        | leucine rich repeat containing 59                    | -1,6 | 0,000001 |
| 1452191_at   | Prpc          | prolylcarboxypeptidase (angiotensinase C)            | -1,6 | 0,000050 |
| 1440408_at   | B830008J18Rik | RIKEN cDNA B830008J18 gene                           | -1,6 | 0,001675 |
| 1455987_at   | Sec61a1       | Sec61 alpha 1 subunit (S. cerevisiae)                | -1,6 | 0,000751 |
| 1444530_at   |               |                                                      | -1,6 | 0,000558 |
| 1423765_at   | Ath1l         | ATH1, acid trehalase-like 1 (yeast)                  | -1,6 | 0,000069 |
| 1449117_at   | Jund          | Jun proto-oncogene related gene d                    | -1,6 | 0,000422 |
| 1451168_a_at | Arhgdia       | Rho GDP dissociation inhibitor (GDI) alpha           | -1,6 | 0,000044 |
| 1460692_at   | Ehmt2         | euchromatic histone lysine N-methyltransferase 2     | -1,6 | 0,000002 |
| 1452045_at   | Zfp281        | zinc finger protein 281                              | -1,6 | 0,003080 |
| 1424660_s_at | Crtc2         | CREB regulated transcription coactivator 2           | -1,6 | 0,000003 |
| 1446929_at   | D130062J21Rik | RIKEN cDNA D130062J21 gene                           | -1,6 | 0,004314 |
| 1439349_at   | Sbno2         | strawberry notch homolog 2 (Drosophila)              | -1,6 | 0,000049 |
| 1451360_at   | Ergic2        | ERGIC and golgi 2                                    | -1,6 | 0,000078 |
| 1439097_at   |               |                                                      | -1,6 | 0,000917 |
| 1416240_at   | Psmb7         | proteasome (prosome, macropain) subunit, beta type 7 | -1,6 | 0,000219 |
| 1422493_at   | Cpox          | coproporphyrinogen oxidase                           | -1,6 | 0,000047 |
| 1448620_at   | Fcgr3         | Fc receptor, IgG, low affinity III                   | -1,6 | 0,012327 |
| 1457062_at   | 1700081L11Rik | RIKEN cDNA 1700081L11 gene                           | -1,6 | 0,000270 |
| 1416397_at   | Mesdc1        | mesoderm development candidate 1                     | -1,6 | 0,000055 |
| 1421832_at   | Twsg1         | twisted gastrulation homolog 1 (Drosophila)          | -1,6 | 0,000081 |
| 1455841_s_at | Grwd1         | glutamate-rich WD repeat containing 1                | -1,6 | 0,000290 |
| 1451221_at   | BC018507      | cDNA sequence BC018507                               | -1,6 | 0,000980 |
| 1418644_a_at | Stk11         | serine/threonine kinase 11                           | -1,6 | 0,000007 |
| 1426627_at   | Map3k7        | mitogen-activated protein kinase kinase kinase 7     | -1,6 | 0,000332 |
| 1443109_at   |               |                                                      | -1,6 | 0,003648 |
| 1425592_at   | Tnpo2         | transportin 2 (importin 3, karyopherin beta 2b)      | -1,6 | 0,000047 |

|              |               |                                                                       |             |          |
|--------------|---------------|-----------------------------------------------------------------------|-------------|----------|
| 1427490_at   | Abcb7         | <b>ATP-binding cassette, sub-family B (MDR/TAP), member 7</b>         | <b>-1,6</b> | 0,001867 |
| 1435514_at   | Lztf11        | <b>leucine zipper transcription factor-like 1</b>                     | <b>-1,6</b> | 0,000522 |
| 1444185_at   |               |                                                                       | <b>-1,6</b> | 0,000027 |
| 1457154_at   |               |                                                                       | <b>-1,6</b> | 0,004512 |
| 1450570_a_at | Cd19          | <b>CD19 antigen</b>                                                   | <b>-1,6</b> | 0,002726 |
| 1446860_at   |               |                                                                       | <b>-1,6</b> | 0,000716 |
| 1450269_a_at | Pfkl          | <b>phosphofructokinase, liver, B-type</b>                             | <b>-1,6</b> | 0,001577 |
| 1429984_at   | 5730455O13Rik | <b>RIKEN cDNA 5730455O13 gene</b>                                     | <b>-1,6</b> | 0,000069 |
| 1457500_at   | Depdc5        | <b>DEP domain containing 5</b>                                        | <b>-1,6</b> | 0,008561 |
| 1438270_at   | Al846148      | <b>expressed sequence Al846148</b>                                    | <b>-1,6</b> | 0,000090 |
| 1459237_at   |               |                                                                       | <b>-1,6</b> | 0,001505 |
| 1426118_a_at | Tomm40        | <b>translocase of outer mitochondrial membrane 40 homolog (yeast)</b> | <b>-1,6</b> | 0,000000 |
| 1416637_at   | Slc4a2        | <b>solute carrier family 4 (anion exchanger), member 2</b>            | <b>-1,6</b> | 0,001438 |
| 1445830_at   | Ctnnd1        | <b>catenin (cadherin associated protein), delta 1</b>                 | <b>-1,6</b> | 0,000297 |
| 1456973_at   |               |                                                                       | <b>-1,6</b> | 0,006071 |
| 1456775_at   | Ints8         | <b>integrator complex subunit 8</b>                                   | <b>-1,6</b> | 0,000013 |
| 1417740_at   | Cdc3711       | <b>cell division cycle 37 homolog (S. cerevisiae)-like 1</b>          | <b>-1,6</b> | 0,000014 |
| 1427987_at   | Safb2         | <b>scaffold attachment factor B2</b>                                  | <b>-1,6</b> | 0,000025 |
| 1435965_at   | Cnot3         | <b>CCR4-NOT transcription complex, subunit 3</b>                      | <b>-1,6</b> | 0,000443 |
| 1419330_a_at | Gpa33         | <b>glycoprotein A33 (transmembrane)</b>                               | <b>-1,6</b> | 0,000202 |
| 1418763_at   | Nit2          | <b>nitrilase family, member 2</b>                                     | <b>-1,6</b> | 0,001825 |
| 1447240_at   |               |                                                                       | <b>-1,6</b> | 0,000594 |
| 1428881_at   | Klc1          | <b>kinesin light chain 1</b>                                          | <b>-1,6</b> | 0,000741 |
| 1457834_at   | Yy1           | <b>YY1 transcription factor</b>                                       | <b>-1,6</b> | 0,000111 |
| 1419054_a_at | Ptpn21        | <b>protein tyrosine phosphatase, non-receptor type 21</b>             | <b>-1,6</b> | 0,000012 |
| 1436039_at   | Cmah          | <b>cytidine monophospho-N-acetylneuraminic acid hydroxylase</b>       | <b>-1,6</b> | 0,004274 |
| 1449976_a_at | Gpr35         | <b>G protein-coupled receptor 35</b>                                  | <b>-1,6</b> | 0,001441 |
| 1436660_at   | Rrbp1         | <b>ribosome binding protein 1</b>                                     | <b>-1,6</b> | 0,000069 |
| 1416750_at   | Sigmar1       | <b>sigma non-opioid intracellular receptor 1</b>                      | <b>-1,6</b> | 0,000003 |
| 1450015_x_at | Sgpp1         | <b>sphingosine-1-phosphate phosphatase 1</b>                          | <b>-1,6</b> | 0,000157 |
| 1452989_at   | 2900009J20Rik | <b>RIKEN cDNA 2900009J20 gene</b>                                     | <b>-1,6</b> | 0,000006 |
| 1434558_at   | Wdr47         | <b>WD repeat domain 47</b>                                            | <b>-1,6</b> | 0,000427 |
| 1438762_at   |               |                                                                       | <b>-1,6</b> | 0,001358 |
| 1426574_a_at | Add3          | <b>adducin 3 (gamma)</b>                                              | <b>-1,6</b> | 0,000523 |
| 1423358_at   | Ece2          | <b>endothelin converting enzyme 2</b>                                 | <b>-1,6</b> | 0,000045 |
| 1453993_a_at | Bnip2         | <b>BCL2/adenovirus E1B interacting protein 2</b>                      | <b>-1,6</b> | 0,003541 |
| 1420917_at   | Prpf40a       | <b>PRP40 pre-mRNA processing factor 40 homolog A (yeast)</b>          | <b>-1,6</b> | 0,003315 |
| 1423446_at   | Dapk3         | <b>death-associated protein kinase 3</b>                              | <b>-1,6</b> | 0,000111 |
| 1436372_a_at | Pdxdc1        | <b>pyridoxal-dependent decarboxylase domain containing 1</b>          | <b>-1,6</b> | 0,000000 |
| 1433804_at   | Jak1          | <b>Janus kinase 1</b>                                                 | <b>-1,6</b> | 0,001153 |
| 1437532_at   | Rnf216        | <b>ring finger protein 216</b>                                        | <b>-1,6</b> | 0,000014 |

|              |               |                                                                                                    |             |          |
|--------------|---------------|----------------------------------------------------------------------------------------------------|-------------|----------|
| 1425660_at   | Btbd3         | <b>BTB (POZ) domain containing 3</b>                                                               | <b>-1,6</b> | 0,000098 |
| 1458934_at   | D5ErtD505e    | <b>DNA segment, Chr 5, ERATO Doi 505 , expressed</b>                                               | <b>-1,6</b> | 0,000130 |
| 1452500_at   |               |                                                                                                    | <b>-1,6</b> | 0,000413 |
| 1418565_at   | Serbp1        | <b>serpine1 mRNA binding protein 1</b>                                                             | <b>-1,6</b> | 0,000069 |
| 1421889_a_at | Aplp2         | <b>amyloid beta (A4) precursor-like protein 2</b>                                                  | <b>-1,6</b> | 0,000002 |
| 1416032_at   | Tmem109       | <b>transmembrane protein 109</b>                                                                   | <b>-1,6</b> | 0,000005 |
| 1420930_s_at | Ctnnal1       | <b>catenin (cadherin associated protein), alpha-like 1</b>                                         | <b>-1,6</b> | 0,000221 |
| 1424056_at   | Usp48         | <b>ubiquitin specific peptidase 48</b>                                                             | <b>-1,6</b> | 0,000033 |
| 1424982_a_at | 2700078E11Rik | <b>RIKEN cDNA 2700078E11 gene</b>                                                                  | <b>-1,6</b> | 0,000015 |
| 1416589_at   | Sparc         | <b>secreted acidic cysteine rich glycoprotein</b>                                                  | <b>-1,6</b> | 0,003182 |
| 1420684_at   | Acox3         | <b>acyl-Coenzyme A oxidase 3, pristanoyl</b>                                                       | <b>-1,6</b> | 0,000980 |
| 1450869_at   | Fgf1          | <b>fibroblast growth factor 1</b>                                                                  | <b>-1,6</b> | 0,004437 |
| 1457970_at   | Actr1a        | <b>ARP1 actin-related protein 1 homolog A, centractin alpha (yeast)</b>                            | <b>-1,6</b> | 0,000068 |
| 1460724_at   | Ap2a1         | <b>adaptor protein complex AP-2, alpha 1 subunit</b>                                               | <b>-1,6</b> | 0,000011 |
| 1447016_at   | Tbc1d1        | <b>TBC1 domain family, member 1</b>                                                                | <b>-1,6</b> | 0,011490 |
| 1430103_at   | 9030607L20Rik | <b>RIKEN cDNA 9030607L20 gene</b>                                                                  | <b>-1,6</b> | 0,000139 |
| 1429847_a_at | 4833418A01Rik | <b>RIKEN cDNA 4833418A01 gene</b>                                                                  | <b>-1,6</b> | 0,000131 |
| 1419550_a_at | Stk39         | <b>serine/threonine kinase 39, STE20/SPS1 homolog (yeast)</b>                                      | <b>-1,6</b> | 0,000124 |
| 1438900_at   | Sacm11        | <b>SAC1 (suppressor of actin mutations 1, homolog)-like (S. cerevisiae)</b>                        | <b>-1,6</b> | 0,000024 |
| 1419573_a_at | Lgals1        | <b>lectin, galactose binding, soluble 1</b>                                                        | <b>-1,6</b> | 0,004722 |
| 1417568_at   | Ncald         | <b>neurocalcin delta</b>                                                                           | <b>-1,6</b> | 0,000054 |
| 1417295_at   | Mta1          | <b>metastasis associated 1</b>                                                                     | <b>-1,6</b> | 0,000002 |
| 1457304_at   | D13ErtD787e   | <b>DNA segment, Chr 13, ERATO Doi 787, expressed</b>                                               | <b>-1,6</b> | 0,000663 |
| 1425680_a_at | Btrc          | <b>beta-transducin repeat containing protein</b>                                                   | <b>-1,6</b> | 0,001617 |
| 1415899_at   | Junb          | <b>Jun-B oncogene</b>                                                                              | <b>-1,6</b> | 0,000475 |
| 1448604_at   | Uck2          | <b>uridine-cytidine kinase 2</b>                                                                   | <b>-1,6</b> | 0,000137 |
| 1431752_a_at | Urm1          | <b>ubiquitin related modifier 1 homolog (S. cerevisiae)</b>                                        | <b>-1,6</b> | 0,000000 |
| 1437476_at   | Rrm2b         | <b>ribonucleotide reductase M2 B (TP53 inducible)</b>                                              | <b>-1,6</b> | 0,000047 |
| 1440305_at   |               |                                                                                                    | <b>-1,6</b> | 0,006857 |
| 1418982_at   | Cebpa         | <b>CCAAT/enhancer binding protein (C/EBP), alpha</b>                                               | <b>-1,6</b> | 0,000543 |
| 1426293_at   | Zfp790        | <b>zinc finger protein 790</b>                                                                     | <b>-1,6</b> | 0,000058 |
| 1448398_s_at | Rpl22         | <b>ribosomal protein L22</b>                                                                       | <b>-1,6</b> | 0,000077 |
| 1416172_at   | Pes1          | <b>pescadillo homolog 1, containing BRCT domain (zebrafish)</b>                                    | <b>-1,6</b> | 0,002955 |
| 1456880_at   |               |                                                                                                    | <b>-1,6</b> | 0,000453 |
| 1456103_at   | Pml           | <b>promyelocytic leukemia</b>                                                                      | <b>-1,6</b> | 0,000070 |
| 1446735_at   | Itsn2         | <b>intersectin 2</b>                                                                               | <b>-1,6</b> | 0,000339 |
| 1452826_s_at | Fbxl20        | <b>F-box and leucine-rich repeat protein 20</b>                                                    | <b>-1,6</b> | 0,000029 |
| 1439639_at   |               |                                                                                                    | <b>-1,6</b> | 0,000795 |
| 1430161_at   | Dlst          | <b>dihydrolipoamide S-succinyltransferase (E2 component of 2-oxo-glutarate complex)</b>            | <b>-1,6</b> | 0,000007 |
| 1441707_at   | Psma3         | <b>proteasome (prosome, macropain) subunit, alpha type 3</b>                                       | <b>-1,6</b> | 0,001559 |
| 1426384_a_at | Ywhae         | <b>tyrosine 3-monooxygenase/tryptophan 5-monooxygenase activation protein, epsilon polypeptide</b> | <b>-1,6</b> | 0,000002 |

|              |               |                                                                          |      |          |
|--------------|---------------|--------------------------------------------------------------------------|------|----------|
| 1457489_at   |               |                                                                          | -1,6 | 0,000753 |
| 1442622_at   |               |                                                                          | -1,6 | 0,000348 |
| 1436917_s_at | D2Bwg1335e    | <b>DNA segment, Chr 2, Brigham &amp; Women's Genetics 1335 expressed</b> | -1,6 | 0,014286 |
| 1453589_a_at | 6820431F20Rik | <b>RIKEN cDNA 6820431F20 gene</b>                                        | -1,6 | 0,002311 |
| 1453380_a_at | Xrcc6bp1      | <b>XRCC6 binding protein 1</b>                                           | -1,6 | 0,000067 |
| 1458508_at   | Matr3         | <b>matrin 3</b>                                                          | -1,6 | 0,000577 |
| 1445438_at   | Ddhd1         | <b>DDHD domain containing 1</b>                                          | -1,6 | 0,000413 |
| 1423045_at   | Ncbp2         | <b>nuclear cap binding protein subunit 2</b>                             | -1,6 | 0,005012 |
| 1431680_a_at | Ptprk         | <b>protein tyrosine phosphatase, receptor type, K</b>                    | -1,6 | 0,000127 |
| 1425650_at   | Tle4          | <b>transducin-like enhancer of split 4, homolog of Drosophila E(spl)</b> | -1,6 | 0,000057 |
| 1416386_a_at | M6pr          | <b>mannose-6-phosphate receptor, cation dependent</b>                    | -1,6 | 0,000004 |
| 1444409_at   | Rph3al        | <b>rabphilin 3A-like (without C2 domains)</b>                            | -1,6 | 0,005737 |
| 1433932_x_at | C030046I01Rik | <b>RIKEN cDNA C030046I01 gene</b>                                        | -1,6 | 0,000314 |
| 1442163_at   |               |                                                                          | -1,6 | 0,000232 |
| 1439342_at   | Clpx          | <b>caseinolytic peptidase X (E.coli)</b>                                 | -1,6 | 0,004189 |
| 1452406_x_at | Erdr1         | <b>erythroid differentiation regulator 1</b>                             | -1,6 | 0,010460 |
| 1441351_at   |               |                                                                          | -1,6 | 0,000444 |
| 1441372_at   | 5930405F01Rik | <b>RIKEN cDNA 5930405F01 gene</b>                                        | -1,6 | 0,007282 |
| 1430538_at   | 2210013O21Rik | <b>RIKEN cDNA 2210013O21 gene</b>                                        | -1,6 | 0,000028 |
| 1425919_at   | Ndufa12       | <b>NADH dehydrogenase (ubiquinone) 1 alpha subcomplex, 12</b>            | -1,6 | 0,001849 |
| 1422719_s_at | Nup50         | <b>nucleoporin 50</b>                                                    | -1,6 | 0,000147 |
| 1424614_at   | Frag1         | <b>FGF receptor activating protein 1</b>                                 | -1,6 | 0,000005 |
| 1425805_a_at | Usp12         | <b>ubiquitin specific peptidase 12</b>                                   | -1,6 | 0,000330 |
| 1459144_at   |               |                                                                          | -1,6 | 0,000573 |
| 1417187_at   | Ube2k         | <b>ubiquitin-conjugating enzyme E2K (UBC1 homolog, yeast)</b>            | -1,6 | 0,000090 |
| 1442244_at   | Inadl         | <b>InaD-like (Drosophila)</b>                                            | -1,6 | 0,000061 |
| 1423229_at   | Inpp5e        | <b>inositol polyphosphate-5-phosphatase E</b>                            | -1,6 | 0,000005 |
| 1418133_at   | Bcl3          | <b>B-cell leukemia/lymphoma 3</b>                                        | -1,6 | 0,000163 |
| 1439125_at   |               |                                                                          | -1,6 | 0,000315 |
| 1447973_at   | Trip11        | <b>thyroid hormone receptor interactor 11</b>                            | -1,6 | 0,000046 |
| 1443896_at   | Tbc1d5        | <b>TBC1 domain family, member 5</b>                                      | -1,6 | 0,000817 |
| 1439467_at   |               |                                                                          | -1,6 | 0,003673 |
| 1435695_a_at | Ggct          | <b>gamma-glutamyl cyclotransferase</b>                                   | -1,6 | 0,000102 |
| 1456388_at   | Atp11a        | <b>ATPase, class VI, type 11A</b>                                        | -1,6 | 0,000083 |
| 1455591_at   | Zfp618        | <b>zinc fingerprotein 618</b>                                            | -1,6 | 0,004499 |
| 1425326_at   | Acly          | <b>ATP citrate lyase</b>                                                 | -1,6 | 0,000080 |
| 1448569_at   | Mlec          | <b>malectin</b>                                                          | -1,6 | 0,000018 |
| 1441769_at   |               |                                                                          | -1,6 | 0,000676 |
| 1443535_at   | Rabgap1       | <b>RAB GTPase activating protein 1</b>                                   | -1,6 | 0,000641 |
| 1438345_at   |               |                                                                          | -1,6 | 0,000016 |
| 1434196_at   | Dnaja4        | <b>DnaJ (Hsp40) homolog, subfamily A, member 4</b>                       | -1,6 | 0,002299 |

|              |               |                                                                                            |             |          |
|--------------|---------------|--------------------------------------------------------------------------------------------|-------------|----------|
| 1435353_a_at | Sfi1          | <b>Sfi1 homolog, spindle assembly associated (yeast)</b>                                   | <b>-1,6</b> | 0,000370 |
| 1434499_a_at | Ldhb          | <b>lactate dehydrogenase B</b>                                                             | <b>-1,6</b> | 0,000298 |
| 1415770_at   | Wdr6          | <b>WD repeat domain 6</b>                                                                  | <b>-1,6</b> | 0,001511 |
| 1448883_at   | Lgmn          | <b>legumain</b>                                                                            | <b>-1,6</b> | 0,000034 |
| 1417188_s_at | Ube2k         | <b>ubiquitin-conjugating enzyme E2K (UBC1 homolog, yeast)</b>                              | <b>-1,6</b> | 0,001320 |
| 1426365_at   | 2810403A07Rik | <b>RIKEN cDNA 2810403A07 gene</b>                                                          | <b>-1,6</b> | 0,001233 |
| 1428656_at   | Rnasen        | <b>ribonuclease III, nuclear</b>                                                           | <b>-1,6</b> | 0,000014 |
| 1423741_at   | Rbm10         | <b>RNA binding motif protein 10</b>                                                        | <b>-1,6</b> | 0,000059 |
| 1456865_x_at | Rrs1          | <b>RRS1 ribosome biogenesis regulator homolog (S. cerevisiae)</b>                          | <b>-1,6</b> | 0,003150 |
| 1444343_at   | A130064L14Rik | <b>RIKEN cDNA A130064L14 gene</b>                                                          | <b>-1,6</b> | 0,003213 |
| 1437182_at   | Dido1         | <b>death inducer-obliterator 1</b>                                                         | <b>-1,6</b> | 0,001909 |
| 1423584_at   | Polr2b        | <b>polymerase (RNA) II (DNA directed) polypeptide B</b>                                    | <b>-1,6</b> | 0,009277 |
| 1432262_at   | Fam63a        | <b>family with sequence similarity 63, member A</b>                                        | <b>-1,6</b> | 0,000079 |
| 1421148_a_at | Tial1         | <b>Tia1 cytotoxic granule-associated RNA binding protein-like 1</b>                        | <b>-1,6</b> | 0,000095 |
| 1460304_a_at | Ubf1          | <b>upstream binding transcription factor, RNA polymerase I</b>                             | <b>-1,6</b> | 0,000021 |
| 1435242_at   | Pds5b         | <b>PDS5, regulator of cohesion maintenance, homolog B (S. cerevisiae)</b>                  | <b>-1,6</b> | 0,001820 |
| 1437184_at   | Guf1          | <b>GUF1 GTPase homolog (S. cerevisiae)</b>                                                 | <b>-1,6</b> | 0,005107 |
| 1436779_at   | Cybb          | <b>cytochrome b-245, beta polypeptide</b>                                                  | <b>-1,6</b> | 0,000232 |
| 1442731_at   | Pds5a         | <b>PDS5, regulator of cohesion maintenance, homolog A (S. cerevisiae)</b>                  | <b>-1,6</b> | 0,004188 |
| 1450407_a_at | Anp32a        | <b>acidic (leucine-rich) nuclear phosphoprotein 32 family, member A</b>                    | <b>-1,6</b> | 0,001097 |
| 1450677_at   | Chek1         | <b>checkpoint kinase 1 homolog (S. pombe)</b>                                              | <b>-1,6</b> | 0,009464 |
| 1456706_at   | 4833441D16Rik | <b>RIKEN cDNA 4833441D16 gene</b>                                                          | <b>-1,6</b> | 0,000346 |
| 1444458_at   |               |                                                                                            | <b>-1,6</b> | 0,002502 |
| 1426631_at   | Pus7          | <b>pseudouridylate synthase 7 homolog (S. cerevisiae)</b>                                  | <b>-1,6</b> | 0,001195 |
| 1444728_at   |               |                                                                                            | <b>-1,6</b> | 0,008412 |
| 1451347_at   | Ino80e        | <b>INO80 complex subunit E</b>                                                             | <b>-1,6</b> | 0,000042 |
| 1447683_x_at | Mettl1        | <b>methyltransferase like 1</b>                                                            | <b>-1,6</b> | 0,000725 |
| 1430942_at   | 8430437O03Rik | <b>RIKEN cDNA 8430437O03 gene</b>                                                          | <b>-1,6</b> | 0,000774 |
| 1417949_at   | Ilf2          | <b>interleukin enhancer binding factor 2</b>                                               | <b>-1,6</b> | 0,001094 |
| 1458292_at   | Psma1         | <b>proteasome (prosome, macropain) subunit, alpha type 1</b>                               | <b>-1,6</b> | 0,001097 |
| 1431425_a_at | Rprd2         | <b>regulation of nuclear pre-mRNA domain containing 2</b>                                  | <b>-1,6</b> | 0,000358 |
| 1452688_at   | Prpf39        | <b>PRP39 pre-mRNA processing factor 39 homolog (yeast)</b>                                 | <b>-1,6</b> | 0,006016 |
| 1441498_at   |               |                                                                                            | <b>-1,6</b> | 0,002558 |
| 1425944_a_at | Rad51l3       | <b>RAD51-like 3 (S. cerevisiae)</b>                                                        | <b>-1,6</b> | 0,000028 |
| 1424603_at   | Sumf1         | <b>sulfatase modifying factor 1</b>                                                        | <b>-1,6</b> | 0,013069 |
| 1460077_at   | Ttc3          | <b>tetratricopeptide repeat domain 3</b>                                                   | <b>-1,6</b> | 0,002865 |
| 1428046_a_at | Zfx           | <b>zinc finger protein X-linked</b>                                                        | <b>-1,6</b> | 0,002966 |
| 1426053_a_at | Xpr1          | <b>xenotropic and polytropic retrovirus receptor 1</b>                                     | <b>-1,6</b> | 0,000149 |
| 1431042_at   | Paqr8         | <b>progesterone and adiponectin receptor family member VIII</b>                            | <b>-1,6</b> | 0,007594 |
| 1435904_at   | Eif2c3        | <b>eukaryotic translation initiation factor 2C, 3</b>                                      | <b>-1,6</b> | 0,000064 |
| 1452055_at   | Ctdsp1        | <b>CTD (carboxy-terminal domain, RNA polymerase II, polypeptide A) small phosphatase 1</b> | <b>-1,6</b> | 0,000014 |

|              |               |                                                                                                     |             |          |
|--------------|---------------|-----------------------------------------------------------------------------------------------------|-------------|----------|
| 1449046_a_at | Josd2         | <b>Josephin domain containing 2</b>                                                                 | <b>-1,6</b> | 0,000006 |
| 1442178_at   |               |                                                                                                     | <b>-1,6</b> | 0,000687 |
| 1460486_at   | Rabgap1       | <b>RAB GTPase activating protein 1</b>                                                              | <b>-1,6</b> | 0,000638 |
| 1444858_at   |               |                                                                                                     | <b>-1,6</b> | 0,000082 |
| 1457281_at   | Dnajc21       | <b>DnaJ (Hsp40) homolog, subfamily C, member 21</b>                                                 | <b>-1,6</b> | 0,000036 |
| 1428924_at   | Mocs3         | <b>molybdenum cofactor synthesis 3</b>                                                              | <b>-1,6</b> | 0,000010 |
| 1440894_at   | Tmtc3         | <b>transmembrane and tetratricopeptide repeat containing 3</b>                                      | <b>-1,6</b> | 0,000030 |
| 1458706_at   |               |                                                                                                     | <b>-1,6</b> | 0,001636 |
| 1436420_a_at | Ipo4          | <b>importin 4</b>                                                                                   | <b>-1,6</b> | 0,000992 |
| 1432910_at   | Btbd7         | <b>BTB (POZ) domain containing 7</b>                                                                | <b>-1,6</b> | 0,000320 |
| 1443216_at   |               |                                                                                                     | <b>-1,6</b> | 0,001614 |
| 1430702_at   | 5830427D03Rik | <b>RIKEN cDNA 5830427D03 gene</b>                                                                   | <b>-1,6</b> | 0,000345 |
| 1456668_at   |               |                                                                                                     | <b>-1,6</b> | 0,000370 |
| 1434660_at   | Alkbh1        | <b>alkB, alkylation repair homolog 1 (E. coli)</b>                                                  | <b>-1,6</b> | 0,009354 |
| 1417289_at   | Plekha2       | <b>pleckstrin homology domain-containing, family A (phosphoinositide binding specific) member 2</b> | <b>-1,6</b> | 0,000003 |
| 1457480_at   |               |                                                                                                     | <b>-1,6</b> | 0,000711 |
| 1446736_at   |               |                                                                                                     | <b>-1,6</b> | 0,002671 |
| 1449582_at   | Cdx1          | <b>caudal type homeo box 1</b>                                                                      | <b>-1,6</b> | 0,000055 |
| 1438138_a_at | Pex6          | <b>peroxisomal biogenesis factor 6</b>                                                              | <b>-1,6</b> | 0,000029 |
| 1459884_at   | Cox7c         | <b>cytochrome c oxidase, subunit VIIc</b>                                                           | <b>-1,6</b> | 0,006762 |
| 1434979_at   | 4933403F05Rik | <b>RIKEN cDNA 4933403F05 gene</b>                                                                   | <b>-1,6</b> | 0,000145 |
| 1437129_at   | E330018D03Rik | <b>RIKEN cDNA E330018D03 gene</b>                                                                   | <b>-1,6</b> | 0,000635 |
| 1425114_at   | Rbbp6         | <b>retinoblastoma binding protein 6</b>                                                             | <b>-1,6</b> | 0,002342 |
| 1429061_at   | 1810063B05Rik | <b>RIKEN cDNA 1810063B05 gene</b>                                                                   | <b>-1,6</b> | 0,000121 |
| 1455334_at   | D330038O06Rik | <b>RIKEN cDNA D330038O06 gene</b>                                                                   | <b>-1,6</b> | 0,004763 |
| 1417848_at   | Zfp704        | <b>zinc finger protein 704</b>                                                                      | <b>-1,6</b> | 0,001610 |
| 1428720_s_at | 2010309G21Rik | <b>RIKEN cDNA 2010309G21 gene</b>                                                                   | <b>-1,6</b> | 0,001547 |
| 1449608_a_at |               |                                                                                                     | <b>-1,6</b> | 0,000524 |
| 1432472_a_at | Mccc2         | <b>methylcrotonoyl-Coenzyme A carboxylase 2 (beta)</b>                                              | <b>-1,6</b> | 0,000141 |
| 1453304_s_at | Ly6e          | <b>lymphocyte antigen 6 complex, locus E</b>                                                        | <b>-1,6</b> | 0,000924 |
| 1448170_at   | Siah2         | <b>seven in absentia 2</b>                                                                          | <b>-1,6</b> | 0,000132 |
| 1442407_at   |               |                                                                                                     | <b>-1,6</b> | 0,000169 |
| 1456255_at   | AI314180      | <b>expressed sequence AI314180</b>                                                                  | <b>-1,6</b> | 0,008396 |
| 1456689_at   | Rnf10         | <b>ring finger protein 10</b>                                                                       | <b>-1,6</b> | 0,000344 |
| 1433931_at   | C030046I01Rik | <b>RIKEN cDNA C030046I01 gene</b>                                                                   | <b>-1,6</b> | 0,000143 |
| 1439920_at   |               |                                                                                                     | <b>-1,6</b> | 0,000003 |
| 1417604_at   | Camk1         | <b>calcium/calmodulin-dependent protein kinase I</b>                                                | <b>-1,6</b> | 0,000003 |
| 1433769_at   | Als2cl        | <b>ALS2 C-terminal like</b>                                                                         | <b>-1,6</b> | 0,000604 |
| 1447099_at   |               |                                                                                                     | <b>-1,6</b> | 0,002973 |
| 1432352_at   | Ccny          | <b>cyclin Y</b>                                                                                     | <b>-1,6</b> | 0,000935 |
| 1415972_at   | Marcks        | <b>myristoylated alanine rich protein kinase C substrate</b>                                        | <b>-1,6</b> | 0,000076 |

|              |               |                                                                                        |             |          |
|--------------|---------------|----------------------------------------------------------------------------------------|-------------|----------|
| 1419132_at   | Tlr2          | <b>toll-like receptor 2</b>                                                            | <b>-1,6</b> | 0,002427 |
| 1451480_at   | E2f4          | <b>E2F transcription factor 4</b>                                                      | <b>-1,6</b> | 0,000011 |
| 1430514_a_at | Cd99          | <b>CD99 antigen</b>                                                                    | <b>-1,6</b> | 0,000026 |
| 1424033_at   | Sfrs7         | <b>splicing factor, arginine/serine-rich 7</b>                                         | <b>-1,6</b> | 0,000804 |
| 1423479_at   | Nol11         | <b>nucleolar protein 11</b>                                                            | <b>-1,6</b> | 0,000682 |
| 1437916_at   |               |                                                                                        | <b>-1,6</b> | 0,000810 |
| 1443773_at   | Ylpm1         | <b>YLP motif containing 1</b>                                                          | <b>-1,6</b> | 0,000663 |
| 1441829_s_at | Akap10        | <b>A kinase (PRKA) anchor protein 10</b>                                               | <b>-1,6</b> | 0,000009 |
| 1442235_at   | Plagl2        | <b>pleiomorphic adenoma gene-like 2</b>                                                | <b>-1,6</b> | 0,008748 |
| 1420682_at   | Chrnbl        | <b>cholinergic receptor, nicotinic, beta polypeptide 1 (muscle)</b>                    | <b>-1,6</b> | 0,004715 |
| 1419191_at   | Hipk3         | <b>homeodomain interacting protein kinase 3</b>                                        | <b>-1,6</b> | 0,000053 |
| 1444224_at   |               |                                                                                        | <b>-1,6</b> | 0,003078 |
| 1442445_at   | 2610027H17Rik | <b>RIKEN cDNA 2610027H17 gene</b>                                                      | <b>-1,6</b> | 0,000919 |
| 1450678_at   | Itgb2         | <b>integrin beta 2</b>                                                                 | <b>-1,6</b> | 0,000404 |
| 1425964_x_at | Hspb1         | <b>heat shock protein 1</b>                                                            | <b>-1,6</b> | 0,000514 |
| 1455657_at   | Smg1          | <b>SMG1 homolog, phosphatidylinositol 3-kinase-related kinase (C. elegans)</b>         | <b>-1,6</b> | 0,000372 |
| 1437492_at   | Mkx           | <b>mohawk homeobox</b>                                                                 | <b>-1,6</b> | 0,000978 |
| 1441823_at   | Zmiz1         | <b>zinc finger, MIZ-type containing 1</b>                                              | <b>-1,6</b> | 0,001297 |
| 1422491_a_at | Bnip2         | <b>BCL2/adenovirus E1B interacting protein 2</b>                                       | <b>-1,6</b> | 0,002041 |
| 1436509_at   | Mlec          | <b>malectin</b>                                                                        | <b>-1,6</b> | 0,000017 |
| 1416190_a_at | Sec61a1       | <b>Sec61 alpha 1 subunit (S. cerevisiae)</b>                                           | <b>-1,6</b> | 0,000001 |
| 1438879_at   |               |                                                                                        | <b>-1,6</b> | 0,001736 |
| 1459009_at   |               |                                                                                        | <b>-1,6</b> | 0,001212 |
| 1417213_a_at | Rbm6          | <b>RNA binding motif protein 6</b>                                                     | <b>-1,6</b> | 0,000001 |
| 1430774_at   | A430106A12Rik | <b>RIKEN cDNA A430106A12 gene</b>                                                      | <b>-1,6</b> | 0,000049 |
| 1453524_at   | Kif5b         | <b>kinesin family member 5B</b>                                                        | <b>-1,6</b> | 0,001314 |
| 1439139_at   | D2Ert640e     | <b>DNA segment, Chr 2, ERATO Doi 640, expressed</b>                                    | <b>-1,6</b> | 0,000107 |
| 1418526_at   | Fusip1        | <b>FUS interacting protein (serine-arginine rich) 1</b>                                | <b>-1,6</b> | 0,000291 |
| 1428949_at   | Xpot          | <b>exportin, tRNA (nuclear export receptor for tRNAs)</b>                              | <b>-1,6</b> | 0,000021 |
| 1418860_a_at | Letmd1        | <b>LETM1 domain containing 1</b>                                                       | <b>-1,6</b> | 0,000007 |
| 1428698_at   | Dpp8          | <b>dipeptidylpeptidase 8</b>                                                           | <b>-1,6</b> | 0,000001 |
| 1452463_x_at | Igk           | <b>immunoglobulin kappa chain complex</b>                                              | <b>-1,6</b> | 0,008891 |
| 1417971_at   | Nrm           | <b>nurim (nuclear envelope membrane protein)</b>                                       | <b>-1,6</b> | 0,000070 |
| 1440287_at   |               |                                                                                        | <b>-1,6</b> | 0,000211 |
| 1417500_a_at | Tgm2          | <b>transglutaminase 2, C polypeptide</b>                                               | <b>-1,6</b> | 0,001019 |
| 1441547_at   |               |                                                                                        | <b>-1,6</b> | 0,008346 |
| 1435426_s_at | Pisd          | <b>phosphatidylserine decarboxylase</b>                                                | <b>-1,6</b> | 0,004280 |
| 1424776_a_at | Slc25a28      | <b>solute carrier family 25, member 28</b>                                             | <b>-1,6</b> | 0,000045 |
| 1450916_at   | Stau2         | <b>staufen (RNA binding protein) homolog 2 (Drosophila)</b>                            | <b>-1,6</b> | 0,000004 |
| 1435271_at   | Irf3          | <b>interferon regulatory factor 3</b>                                                  | <b>-1,6</b> | 0,002310 |
| 1421895_at   | Eif2s3x       | <b>eukaryotic translation initiation factor 2, subunit 3, structural gene X-linked</b> | <b>-1,6</b> | 0,000067 |



|              |               |                                                                                              |             |          |
|--------------|---------------|----------------------------------------------------------------------------------------------|-------------|----------|
| 1452036_a_at | Tmpo          | <b>thymopoietin</b>                                                                          | <b>-1,6</b> | 0,003940 |
| 1440671_at   | A130012E19Rik | <b>RIKEN cDNA A130012E19 gene</b>                                                            | <b>-1,6</b> | 0,001119 |
| 1421819_a_at | Set           | <b>SET translocation</b>                                                                     | <b>-1,6</b> | 0,006512 |
| 1438674_a_at | Sfrs8         | <b>splicing factor, arginine/serine-rich 8</b>                                               | <b>-1,6</b> | 0,000122 |
| 1452280_at   | Farp1         | <b>FERM, RhoGEF (Arhgef) and pleckstrin domain protein 1 (chondrocyte-derived)</b>           | <b>-1,6</b> | 0,000698 |
| 1445545_at   | Tmem77        | <b>transmembrane protein 77</b>                                                              | <b>-1,6</b> | 0,000037 |
| 1442834_at   |               |                                                                                              | <b>-1,6</b> | 0,002241 |
| 1455472_at   | A630071D13Rik | <b>RIKEN cDNA A630071D13 gene</b>                                                            | <b>-1,6</b> | 0,002588 |
| 1442911_at   | Riok2         | <b>RIO kinase 2 (yeast)</b>                                                                  | <b>-1,6</b> | 0,000389 |
| 1442338_at   |               |                                                                                              | <b>-1,6</b> | 0,000364 |
| 1423966_at   | Cd99l2        | <b>CD99 antigen-like 2</b>                                                                   | <b>-1,6</b> | 0,000003 |
| 1451465_at   | Ubl7          | <b>ubiquitin-like 7 (bone marrow stromal cell-derived)</b>                                   | <b>-1,6</b> | 0,000012 |
| 1416019_at   | Dr1           | <b>down-regulator of transcription 1</b>                                                     | <b>-1,6</b> | 0,000157 |
| 1451518_at   | Zfp709        | <b>zinc finger protein 709</b>                                                               | <b>-1,6</b> | 0,000061 |
| 1446548_at   |               |                                                                                              | <b>-1,6</b> | 0,000903 |
| 1435561_at   | Erf           | <b>Ets2 repressor factor</b>                                                                 | <b>-1,6</b> | 0,000001 |
| 1429897_a_at | D16Ert472e    | <b>DNA segment, Chr 16, ERATO Doi 472, expressed</b>                                         | <b>-1,6</b> | 0,003804 |
| 1426756_at   | Galnt2        | <b>UDP-N-acetyl-alpha-D-galactosamine:polypeptide N-acetylgalactosaminyltransferase 2</b>    | <b>-1,6</b> | 0,000010 |
| 1428506_at   | Atic          | <b>5-aminoimidazole-4-carboxamide ribonucleotide formyltransferase/IMP cyclohydrolase</b>    | <b>-1,6</b> | 0,000054 |
| 1459856_at   |               |                                                                                              | <b>-1,6</b> | 0,003912 |
| 1434436_at   | Morc4         | <b>microrchidia 4</b>                                                                        | <b>-1,6</b> | 0,003481 |
| 1418230_a_at | Lims1         | <b>LIM and senescent cell antigen-like domains 1</b>                                         | <b>-1,6</b> | 0,000188 |
| 1453852_at   | Ddx50         | <b>DEAD (Asp-Glu-Ala-Asp) box polypeptide 50</b>                                             | <b>-1,6</b> | 0,000630 |
| 1442971_at   | Baz2b         | <b>bromodomain adjacent to zinc finger domain, 2B</b>                                        | <b>-1,6</b> | 0,000586 |
| 1416389_a_at | Rcbtb2        | <b>regulator of chromosome condensation (RCC1) and BTB (POZ) domain containing protein 2</b> | <b>-1,6</b> | 0,000143 |
| 1418901_at   | Cebpβ         | <b>CCAAT/enhancer binding protein (C/EBP), beta</b>                                          | <b>-1,6</b> | 0,008045 |
| 1429207_at   | 5730408K05Rik | <b>RIKEN cDNA 5730408K05 gene</b>                                                            | <b>-1,6</b> | 0,003856 |
| 1431026_at   | Nat12         | <b>N-acetyltransferase 12</b>                                                                | <b>-1,6</b> | 0,000034 |
| 1431196_at   | Atp2c1        | <b>ATPase, Ca<sup>++</sup>-sequestering</b>                                                  | <b>-1,6</b> | 0,000022 |
| 1421260_a_at | Srm           | <b>spermidine synthase</b>                                                                   | <b>-1,6</b> | 0,004647 |
| 1431287_at   | Pcm1          | <b>pericentriolar material 1</b>                                                             | <b>-1,6</b> | 0,005889 |
| 1460035_at   | Phb2          | <b>prohibitin 2</b>                                                                          | <b>-1,6</b> | 0,000018 |
| 1450076_at   | 4933411K20Rik | <b>RIKEN cDNA 4933411K20 gene</b>                                                            | <b>-1,6</b> | 0,000185 |
| 1452187_at   | Rbm5          | <b>RNA binding motif protein 5</b>                                                           | <b>-1,6</b> | 0,000363 |
| 1452433_at   |               |                                                                                              | <b>-1,6</b> | 0,000121 |
| 1443880_at   | Zbtb39        | <b>zinc finger and BTB domain containing 39</b>                                              | <b>-1,6</b> | 0,000003 |
| 1416536_at   | Mum1          | <b>melanoma associated antigen (mutated) 1</b>                                               | <b>-1,6</b> | 0,000021 |
| 1430135_at   | Dnase2a       | <b>deoxyribonuclease II alpha</b>                                                            | <b>-1,6</b> | 0,004152 |
| 1428129_at   | Lman1         | <b>lectin, mannose-binding, 1</b>                                                            | <b>-1,6</b> | 0,000003 |
| 1452024_a_at | Ldb1          | <b>LIM domain binding 1</b>                                                                  | <b>-1,6</b> | 0,000059 |
| 1448103_s_at | Nono          | <b>non-POU-domain-containing, octamer binding protein</b>                                    | <b>-1,6</b> | 0,001794 |

|              |                |                                                                          |      |          |
|--------------|----------------|--------------------------------------------------------------------------|------|----------|
| 1437449_at   | Rsad1          | radical S-adenosyl methionine domain containing 1                        | -1,6 | 0,000210 |
| 1457673_at   | 6820431F20Rik  | RIKEN cDNA 6820431F20 gene                                               | -1,6 | 0,002976 |
| 1438887_a_at | Gmcl1          | germ cell-less homolog 1 (Drosophila)                                    | -1,6 | 0,000146 |
| 1424290_at   | Osgin2         | oxidative stress induced growth inhibitor family member 2                | -1,6 | 0,000019 |
| 1449037_at   | Crem           | cAMP responsive element modulator                                        | -1,6 | 0,000214 |
| 1453247_at   | Zfp618         | zinc fingerprotein 618                                                   | -1,6 | 0,005570 |
| 1448013_at   | Usp24          | ubiquitin specific peptidase 24                                          | -1,6 | 0,000150 |
| 1439302_at   | Uba6           | ubiquitin-like modifier activating enzyme 6                              | -1,6 | 0,000322 |
| 1438072_at   |                |                                                                          | -1,6 | 0,000934 |
| 1455336_at   | Thap2          | THAP domain containing, apoptosis associated protein 2                   | -1,6 | 0,001068 |
| 1448307_at   | Psmg1          | proteasome (prosome, macropain) assembly chaperone 1                     | -1,6 | 0,000476 |
| 1440847_at   | Mtss1          | metastasis suppressor 1                                                  | -1,6 | 0,001205 |
| 1448230_at   | Usp10          | ubiquitin specific peptidase 10                                          | -1,6 | 0,000478 |
| 1457802_at   | B930012P20Rik  | RIKEN cDNA B930012P20 gene                                               | -1,6 | 0,000492 |
| 1449044_at   | Eef1e1         | eukaryotic translation elongation factor 1 epsilon 1                     | -1,6 | 0,005174 |
| 1427040_at   | Mdfic          | MyoD family inhibitor domain containing                                  | -1,6 | 0,003302 |
| 1448274_at   | C1qbp          | complement component 1, q subcomponent binding protein                   | -1,6 | 0,000608 |
| 1422718_at   | Ap3s2          | adaptor-related protein complex 3, sigma 2 subunit                       | -1,6 | 0,000007 |
| 1437067_at   | Phtf2          | putative homeodomain transcription factor 2                              | -1,6 | 0,007632 |
| 1455496_at   | Pfas           | phosphoribosylformylglycinamide synthase (FGAR amidotransferase)         | -1,6 | 0,000077 |
| 1448667_x_at | Tob2           | transducer of ERBB2, 2                                                   | -1,6 | 0,000190 |
| 1436422_at   | BC026590       | cDNA sequence BC026590                                                   | -1,6 | 0,000047 |
| 1444856_at   |                |                                                                          | -1,6 | 0,002741 |
| 1452426_x_at |                |                                                                          | -1,6 | 0,007162 |
| 1429110_a_at | Nsun4          | NOL1/NOP2/Sun domain family, member 4                                    | -1,6 | 0,000818 |
| 1442023_at   | A530030E21Rik  | RIKEN cDNA A530030E21 gene                                               | -1,6 | 0,013231 |
| 1445267_at   |                |                                                                          | -1,6 | 0,000258 |
| 1451154_a_at | Cugbp2         | CUG triplet repeat, RNA binding protein 2                                | -1,6 | 0,007877 |
| 1452916_at   | Wbp7           | WW domain binding protein 7                                              | -1,6 | 0,000014 |
| 1449861_at   | Nek4           | NIMA (never in mitosis gene a)-related expressed kinase 4                | -1,6 | 0,000002 |
| 1435037_at   | Perld1         | per1-like domain containing 1                                            | -1,6 | 0,001369 |
| 1456648_at   |                |                                                                          | -1,6 | 0,007836 |
| 1422145_at   | Mgat3          | mannoside acetylglucosaminyltransferase 3                                | -1,6 | 0,007613 |
| 1452799_at   | Fggy           | FGGY carbohydrate kinase domain containing                               | -1,6 | 0,000360 |
| 1421337_at   | SMUSG000000535 | predicted gene, ENSMUSG00000053512                                       | -1,6 | 0,000013 |
| 1417948_s_at | Ilf2           | interleukin enhancer binding factor 2                                    | -1,6 | 0,003070 |
| 1444744_at   |                |                                                                          | -1,6 | 0,000034 |
| 1428187_at   | Cd47           | CD47 antigen (Rh-related antigen, integrin-associated signal transducer) | -1,7 | 0,000338 |
| 1442078_at   |                |                                                                          | -1,7 | 0,000050 |
| 1425940_a_at | Ssbp3          | single-stranded DNA binding protein 3                                    | -1,7 | 0,000165 |
| 1415900_a_at | Kit            | kit oncogene                                                             | -1,7 | 0,000522 |

|              |               |                                                                                                      |      |          |
|--------------|---------------|------------------------------------------------------------------------------------------------------|------|----------|
| 1439276_at   | Adar          | adenosine deaminase, RNA-specific                                                                    | -1,7 | 0,001449 |
| 1423334_at   | Ergic1        | endoplasmic reticulum-golgi intermediate compartment (ERGIC) 1                                       | -1,7 | 0,000022 |
| 1416158_at   | Nr2f2         | nuclear receptor subfamily 2, group F, member 2                                                      | -1,7 | 0,000004 |
| 1415761_at   | Mrpl52        | mitochondrial ribosomal protein L52                                                                  | -1,7 | 0,000361 |
| 1436177_at   | Plekha2       | pleckstrin homology domain-containing, family A (phosphoinositide binding specific) member 2         | -1,7 | 0,000003 |
| 1452402_at   |               |                                                                                                      | -1,7 | 0,001166 |
| 1426888_at   | Ehmt2         | euchromatic histone lysine N-methyltransferase 2                                                     | -1,7 | 0,000284 |
| 1428466_at   | Chd3          | chromodomain helicase DNA binding protein 3                                                          | -1,7 | 0,000126 |
| 1442126_at   |               |                                                                                                      | -1,7 | 0,000568 |
| 1424055_at   | Ncoa5         | nuclear receptor coactivator 5                                                                       | -1,7 | 0,000003 |
| 1453736_s_at | B230219D22Rik | RIKEN cDNA B230219D22 gene                                                                           | -1,7 | 0,000064 |
| 1446703_at   |               |                                                                                                      | -1,7 | 0,000403 |
| 1440268_at   | Trim41        | tripartite motif-containing 41                                                                       | -1,7 | 0,000079 |
| 1415956_a_at | Pctk1         | PCTAIRE-motif protein kinase 1                                                                       | -1,7 | 0,000001 |
| 1418274_at   | Nutf2         | nuclear transport factor 2                                                                           | -1,7 | 0,001755 |
| 1435328_at   | Cyhr1         | cysteine and histidine rich 1                                                                        | -1,7 | 0,000001 |
| 1422954_at   | Zfp60         | zinc finger protein 60                                                                               | -1,7 | 0,000873 |
| 1422167_at   | Sema5a        | sema domain, seven thrombospondin repeats (type 1 and type 1-like), transmembrane domain (TM) and sl | -1,7 | 0,000024 |
| 1455095_at   | Hist2h2be     | histone cluster 2, H2be                                                                              | -1,7 | 0,000017 |
| 1443546_at   |               |                                                                                                      | -1,7 | 0,002365 |
| 1449939_s_at | Dlk1          | delta-like 1 homolog (Drosophila)                                                                    | -1,7 | 0,010905 |
| 1422492_at   | Cpox          | coproporphyrinogen oxidase                                                                           | -1,7 | 0,000038 |
| 1447156_at   |               |                                                                                                      | -1,7 | 0,002139 |
| 1442580_at   | A530020G20Rik | RIKEN cDNA A530020G20 gene                                                                           | -1,7 | 0,000550 |
| 1434054_at   | Sirt7         | sirtuin 7 (silent mating type information regulation 2, homolog) 7 (S. cerevisiae)                   | -1,7 | 0,015511 |
| 1432901_at   | Etl4          | enhancer trap locus 4                                                                                | -1,7 | 0,000591 |
| 1435319_at   | Ip6k2         | inositol hexaphosphate kinase 2                                                                      | -1,7 | 0,000004 |
| 1459187_at   |               |                                                                                                      | -1,7 | 0,003124 |
| 1441404_at   |               |                                                                                                      | -1,7 | 0,000697 |
| 1457510_at   |               |                                                                                                      | -1,7 | 0,000739 |
| 1415773_at   | Ncl           | nucleolin                                                                                            | -1,7 | 0,004947 |
| 1441415_at   |               |                                                                                                      | -1,7 | 0,000301 |
| 1418128_at   | Adcy6         | adenylate cyclase 6                                                                                  | -1,7 | 0,000062 |
| 1426850_a_at | Map2k6        | mitogen-activated protein kinase kinase 6                                                            | -1,7 | 0,000446 |
| 1443551_at   | Atp2a2        | ATPase, Ca <sup>++</sup> transporting, cardiac muscle, slow twitch 2                                 | -1,7 | 0,004350 |
| 1438326_at   | Trmt6         | tRNA methyltransferase 6 homolog (S. cerevisiae)                                                     | -1,7 | 0,003491 |
| 1450400_at   | Tgs1          | trimethylguanosine synthase homolog (S. cerevisiae)                                                  | -1,7 | 0,000408 |
| 1426988_at   | Klhdcs5       | kelch domain containing 5                                                                            | -1,7 | 0,000307 |
| 1419295_at   | Creb3l1       | cAMP responsive element binding protein 3-like 1                                                     | -1,7 | 0,004428 |
| 1439209_at   | Tcf12         | transcription factor 12                                                                              | -1,7 | 0,000963 |
| 1423522_at   | Npm3          | nucleoplasmin 3                                                                                      | -1,7 | 0,000952 |

|              |                |                                                                         |      |          |
|--------------|----------------|-------------------------------------------------------------------------|------|----------|
| 1428301_at   | SMUSG000000687 | predicted gene, ENSMUSG00000068790                                      | -1,7 | 0,001189 |
| 1425087_at   | 2310003F16Rik  | RIKEN cDNA 2310003F16 gene                                              | -1,7 | 0,001249 |
| 1452764_at   | Socs6          | suppressor of cytokine signaling 6                                      | -1,7 | 0,001346 |
| 1434067_at   | AI662270       | expressed sequence AI662270                                             | -1,7 | 0,002259 |
| 1418915_at   | Mmachc         | methylmalonic aciduria cblC type, with homocystinuria                   | -1,7 | 0,000066 |
| 1424622_at   | Hsf1           | heat shock factor 1                                                     | -1,7 | 0,000009 |
| 1440892_at   |                |                                                                         | -1,7 | 0,012066 |
| 1445966_at   |                |                                                                         | -1,7 | 0,000375 |
| 1421955_a_at | Nedd4          | neural precursor cell expressed, developmentally down-regulated 4       | -1,7 | 0,000079 |
| 1444001_at   |                |                                                                         | -1,7 | 0,000862 |
| 1425373_a_at | Psmg2          | proteasome (prosome, macropain) assembly chaperone 2                    | -1,7 | 0,000655 |
| 1420894_at   | Tgfr1          | transforming growth factor, beta receptor I                             | -1,7 | 0,000027 |
| 1441274_at   |                |                                                                         | -1,7 | 0,000484 |
| 1422680_at   | Ctr9           | Ctr9, Paf1/RNA polymerase II complex component, homolog (S. cerevisiae) | -1,7 | 0,000013 |
| 1438941_x_at | Ampd2          | adenosine monophosphate deaminase 2 (isoform L)                         | -1,7 | 0,002520 |
| 1425227_a_at | Atp6v0a1       | ATPase, H+ transporting, lysosomal V0 subunit A1                        | -1,7 | 0,000210 |
| 1420887_a_at | Bcl2l1         | BCL2-like 1                                                             | -1,7 | 0,000349 |
| 1415682_at   | Xpo7           | exportin 7                                                              | -1,7 | 0,000007 |
| 1435136_at   | Whsc1          | Wolf-Hirschhorn syndrome candidate 1 (human)                            | -1,7 | 0,009310 |
| 1423084_at   | B3galt2        | UDP-Gal:betaGlcNAc beta 1,3-galactosyltransferase, polypeptide 2        | -1,7 | 0,003250 |
| 1442216_at   |                |                                                                         | -1,7 | 0,000038 |
| 1429961_at   | 1700021C14Rik  | RIKEN cDNA 1700021C14 gene                                              | -1,7 | 0,001116 |
| 1437965_at   | Heatr1         | HEAT repeat containing 1                                                | -1,7 | 0,000474 |
| 1429344_at   | 9,13E+15       | hypothetical 9130022E09                                                 | -1,7 | 0,003841 |
| 1457479_at   |                |                                                                         | -1,7 | 0,003516 |
| 1437756_at   | Gimap9         | GTPase, IMAP family member 9                                            | -1,7 | 0,000628 |
| 1423726_at   | Vat1           | vesicle amine transport protein 1 homolog (T californica)               | -1,7 | 0,000017 |
| 1427983_at   | Zfp280c        | zinc finger protein 280C                                                | -1,7 | 0,008125 |
| 1424423_at   | Lenep          | lens epithelial protein                                                 | -1,7 | 0,000010 |
| 1431960_at   | Wwox           | WW domain-containing oxidoreductase                                     | -1,7 | 0,000012 |
| 1443365_at   | Htr4           | 5 hydroxytryptamine (serotonin) receptor 4                              | -1,7 | 0,000076 |
| 1415872_at   | Hnrmp1         | heterogeneous nuclear ribonucleoprotein H1                              | -1,7 | 0,008223 |
| 1428414_at   | Ccny           | cyclin Y                                                                | -1,7 | 0,010028 |
| 1417619_at   | Gadd45gip1     | growth arrest and DNA-damage-inducible, gamma interacting protein 1     | -1,7 | 0,000158 |
| 1451026_at   | Ftsj3          | FtsJ homolog 3 (E. coli)                                                | -1,7 | 0,004494 |
| 1428354_at   | Foxk2          | forkhead box K2                                                         | -1,7 | 0,000019 |
| 1460555_at   | Fam65b         | family with sequence similarity 65, member B                            | -1,7 | 0,002909 |
| 1441960_x_at | 5730494M16Rik  | RIKEN cDNA 5730494M16 gene                                              | -1,7 | 0,005162 |
| 1438076_at   | Rpl30          | ribosomal protein L30                                                   | -1,7 | 0,003279 |
| 1445963_at   |                |                                                                         | -1,7 | 0,000007 |
| 1438683_at   | Wasf2          | WAS protein family, member 2                                            | -1,7 | 0,000113 |

|              |               |                                                              |      |          |
|--------------|---------------|--------------------------------------------------------------|------|----------|
| 1448348_at   | Caprin1       | cell cycle associated protein 1                              | -1,7 | 0,000028 |
| 1459961_a_at | Stat3         | signal transducer and activator of transcription 3           | -1,7 | 0,000047 |
| 1442006_at   |               |                                                              | -1,7 | 0,000001 |
| 1418980_a_at | Cnp           | 2',3'-cyclic nucleotide 3' phosphodiesterase                 | -1,7 | 0,000002 |
| 1419477_at   | Clec2d        | C-type lectin domain family 2, member d                      | -1,7 | 0,005793 |
| 1451849_a_at | Lmnb2         | lamin B2                                                     | -1,7 | 0,000493 |
| 1415957_a_at | Rrp1          | ribosomal RNA processing 1 homolog (S. cerevisiae)           | -1,7 | 0,000001 |
| 1427884_at   | Col3a1        | collagen, type III, alpha 1                                  | -1,7 | 0,015212 |
| 1437359_at   | Rnps1         | ribonucleic acid binding protein S1                          | -1,7 | 0,002052 |
| 1437789_at   | Birc6         | baculoviral IAP repeat-containing 6                          | -1,7 | 0,001125 |
| 1452508_x_at | Ptms          | parathyrosin                                                 | -1,7 | 0,000115 |
| 1423048_a_at | Tollip        | toll interacting protein                                     | -1,7 | 0,001738 |
| 1418527_a_at | Fusip1        | FUS interacting protein (serine-arginine rich) 1             | -1,7 | 0,001000 |
| 1428158_at   | Akt1s1        | AKT1 substrate 1 (proline-rich)                              | -1,7 | 0,000002 |
| 1459143_at   | Chchd3        | coiled-coil-helix-coiled-coil-helix domain containing 3      | -1,7 | 0,000021 |
| 1439933_at   | B430316J06Rik | RIKEN cDNA B430316J06 gene                                   | -1,7 | 0,003674 |
| 1450246_at   | Fut2          | fucosyltransferase 2                                         | -1,7 | 0,004580 |
| 1459196_at   |               |                                                              | -1,7 | 0,001851 |
| 1445919_at   | AA409261      | expressed sequence AA409261                                  | -1,7 | 0,000207 |
| 1439148_a_at | Pfkl          | phosphofructokinase, liver, B-type                           | -1,7 | 0,001722 |
| 1455092_at   | LOC100043601  | hypothetical protein LOC100043601                            | -1,7 | 0,002534 |
| 1430971_a_at | Aqr           | aquarius                                                     | -1,7 | 0,000005 |
| 1430089_at   | 5830469G19Rik | RIKEN cDNA 5830469G19 gene                                   | -1,7 | 0,000043 |
| 1416014_at   | Abce1         | ATP-binding cassette, sub-family E (OABP), member 1          | -1,7 | 0,002350 |
| 1438800_at   | Nagk          | N-acetylglucosamine kinase                                   | -1,7 | 0,000159 |
| 1448123_s_at | Tgfb1         | transforming growth factor, beta induced                     | -1,7 | 0,002235 |
| 1426897_at   | Rcc2          | regulator of chromosome condensation 2                       | -1,7 | 0,013166 |
| 1418851_at   | Trim39        | tripartite motif-containing 39                               | -1,7 | 0,000439 |
| 1440736_at   | AI131651      | expressed sequence AI131651                                  | -1,7 | 0,000018 |
| 1454823_at   | Wdr37         | WD repeat domain 37                                          | -1,7 | 0,000004 |
| 1444760_at   | Ncor1         | nuclear receptor co-repressor 1                              | -1,7 | 0,001322 |
| 1438353_at   |               |                                                              | -1,7 | 0,000356 |
| 1441141_at   | Amn1          | antagonist of mitotic exit network 1 homolog (S. cerevisiae) | -1,7 | 0,001109 |
| 1439093_at   |               |                                                              | -1,7 | 0,001304 |
| 1424333_at   | Rg9mtd1       | RNA (guanine-9-) methyltransferase domain containing 1       | -1,7 | 0,000903 |
| 1424874_a_at | Ptbp1         | polypyrimidine tract binding protein 1                       | -1,7 | 0,000003 |
| 1458460_at   |               |                                                              | -1,7 | 0,000516 |
| 1439126_at   | 1110007A13Rik | RIKEN cDNA 1110007A13 gene                                   | -1,7 | 0,001467 |
| 1430152_at   | Eps15         | epidermal growth factor receptor pathway substrate 15        | -1,7 | 0,000344 |
| 1417420_at   | Ccnd1         | cyclin D1                                                    | -1,7 | 0,001049 |
| 1447166_at   |               |                                                              | -1,7 | 0,007471 |

|              |               |                                                                 |      |          |
|--------------|---------------|-----------------------------------------------------------------|------|----------|
| 1447491_at   |               |                                                                 | -1,7 | 0,000108 |
| 1458056_at   | Sfrs12        | <b>splicing factor, arginine/serine-rich 12</b>                 | -1,7 | 0,006472 |
| 1450082_s_at | Etv5          | <b>ets variant gene 5</b>                                       | -1,7 | 0,000807 |
| 1451687_a_at | Hnf1b         | <b>HNF1 homeobox B</b>                                          | -1,7 | 0,000007 |
| 1452247_at   | Fxr1          | <b>fragile X mental retardation gene 1, autosomal homolog</b>   | -1,7 | 0,001184 |
| 1452974_at   | No18          | <b>nucleolar protein 8</b>                                      | -1,7 | 0,006437 |
| 1423909_at   | Tmem176a      | <b>transmembrane protein 176A</b>                               | -1,7 | 0,001463 |
| 1435018_at   | 5930434B04Rik | <b>RIKEN cDNA 5930434B04 gene</b>                               | -1,7 | 0,000001 |
| 1446982_at   |               |                                                                 | -1,7 | 0,000029 |
| 1418296_at   | Fxyd5         | <b>FXDYD domain-containing ion transport regulator 5</b>        | -1,7 | 0,000210 |
| 1453556_x_at | Cd99          | <b>CD99 antigen</b>                                             | -1,7 | 0,000026 |
| 1433972_at   | Camta1        | <b>calmodulin binding transcription activator 1</b>             | -1,7 | 0,002059 |
| 1441477_at   | Calu          | <b>calumenin</b>                                                | -1,7 | 0,000018 |
| 1433621_at   | Wdr41         | <b>WD repeat domain 41</b>                                      | -1,7 | 0,000005 |
| 1457588_at   | C76213        | <b>expressed sequence C76213</b>                                | -1,7 | 0,001053 |
| 1441624_at   | Sorbs2        | <b>sorbin and SH3 domain containing 2</b>                       | -1,7 | 0,010746 |
| 1449155_at   | Polr3g        | <b>polymerase (RNA) III (DNA directed) polypeptide G</b>        | -1,7 | 0,000203 |
| 1416355_at   | RbmX          | <b>RNA binding motif protein, X chromosome</b>                  | -1,7 | 0,000245 |
| 1460642_at   | Traf4         | <b>TNF receptor associated factor 4</b>                         | -1,7 | 0,000018 |
| 1459897_a_at | Sbsn          | <b>suprabasin</b>                                               | -1,7 | 0,000142 |
| 1439159_at   | Rere          | <b>arginine glutamic acid dipeptide (RE) repeats</b>            | -1,7 | 0,007589 |
| 1426873_s_at | Jup           | <b>junction plakoglobin</b>                                     | -1,7 | 0,000423 |
| 1432360_a_at | Tmtc4         | <b>transmembrane and tetratricopeptide repeat containing 4</b>  | -1,7 | 0,001587 |
| 1419964_s_at | Hdgf          | <b>hepatoma-derived growth factor</b>                           | -1,7 | 0,000111 |
| 1446345_at   |               |                                                                 | -1,7 | 0,000394 |
| 1438065_at   | Rprd1a        | <b>regulation of nuclear pre-mRNA domain containing 1A</b>      | -1,7 | 0,001320 |
| 1417988_at   | Resp18        | <b>regulated endocrine-specific protein 18</b>                  | -1,7 | 0,000506 |
| 1425544_at   | Plekha5       | <b>pleckstrin homology domain containing, family A member 5</b> | -1,7 | 0,000576 |
| 1426051_a_at | Cenpb         | <b>centromere protein B</b>                                     | -1,7 | 0,000004 |
| 1446172_at   |               |                                                                 | -1,7 | 0,001986 |
| 1435036_at   | Aspg          | <b>asparaginase homolog (S. cerevisiae)</b>                     | -1,7 | 0,003065 |
| 1441487_at   | Trim2         | <b>tripartite motif-containing 2</b>                            | -1,7 | 0,000155 |
| 1427439_s_at | Prmt5         | <b>protein arginine N-methyltransferase 5</b>                   | -1,7 | 0,000072 |
| 1428636_at   | Steap2        | <b>six transmembrane epithelial antigen of prostate 2</b>       | -1,7 | 0,000409 |
| 1419460_at   | Rpp14         | <b>ribonuclease P 14 subunit (human)</b>                        | -1,7 | 0,002587 |
| 1450124_a_at | Atp2a3        | <b>ATPase, Ca<sup>++</sup> transporting, ubiquitous</b>         | -1,7 | 0,000133 |
| 1418280_at   | Klf6          | <b>Kruppel-like factor 6</b>                                    | -1,7 | 0,004401 |
| 1450873_at   | Gtpbp4        | <b>GTP binding protein 4</b>                                    | -1,7 | 0,006135 |
| 1423271_at   | Gjb2          | <b>gap junction protein, beta 2</b>                             | -1,7 | 0,001044 |
| 1426085_a_at | Pxn           | <b>paxillin</b>                                                 | -1,7 | 0,000200 |
| 1429096_at   | 2810455D13Rik | <b>RIKEN cDNA 2810455D13 gene</b>                               | -1,7 | 0,000106 |

|              |               |                                                                         |  |      |          |
|--------------|---------------|-------------------------------------------------------------------------|--|------|----------|
| 1446090_at   |               |                                                                         |  | -1,7 | 0,000273 |
| 1422735_at   | Foxq1         | <b>forkhead box Q1</b>                                                  |  | -1,7 | 0,007640 |
| 1438257_at   |               |                                                                         |  | -1,7 | 0,000012 |
| 1429900_at   | 5330406M23Rik | <b>RIKEN cDNA 5330406M23 gene</b>                                       |  | -1,7 | 0,001830 |
| 1426550_at   | Sidt1         | <b>SID1 transmembrane family, member 1</b>                              |  | -1,7 | 0,000009 |
| 1426958_at   | Rps9          | <b>ribosomal protein S9</b>                                             |  | -1,7 | 0,012268 |
| 1442139_at   |               |                                                                         |  | -1,7 | 0,001937 |
| 1453077_a_at | Snopc3        | <b>small nuclear RNA activating complex, polypeptide 3</b>              |  | -1,7 | 0,007419 |
| 1441117_at   |               |                                                                         |  | -1,7 | 0,002135 |
| 1423333_at   | Ergic1        | <b>endoplasmic reticulum-golgi intermediate compartment (ERGIC) 1</b>   |  | -1,7 | 0,000001 |
| 1446475_at   |               |                                                                         |  | -1,7 | 0,000295 |
| 1456661_at   |               |                                                                         |  | -1,7 | 0,000075 |
| 1429058_at   | Tmem107       | <b>transmembrane protein 107</b>                                        |  | -1,7 | 0,000004 |
| 1427193_at   | Brd8          | <b>bromodomain containing 8</b>                                         |  | -1,7 | 0,000346 |
| 1424620_at   | Nop16         | <b>NOP16 nucleolar protein homolog (yeast)</b>                          |  | -1,7 | 0,000467 |
| 1460633_at   | Prpf19        | <b>PRP19/PSO4 pre-mRNA processing factor 19 homolog (S. cerevisiae)</b> |  | -1,7 | 0,000073 |
| 1419647_a_at | ler3          | <b>immediate early response 3</b>                                       |  | -1,7 | 0,006508 |
| 1430417_s_at | Neurl4        | <b>neuralized homolog 4 (Drosophila)</b>                                |  | -1,7 | 0,000018 |
| 1417852_x_at | Clca1         | <b>chloride channel calcium activated 1</b>                             |  | -1,7 | 0,000018 |
| 1436145_at   |               |                                                                         |  | -1,7 | 0,000264 |
| 1460351_at   | S100a11       | <b>S100 calcium binding protein A11 (calgizzarin)</b>                   |  | -1,7 | 0,006176 |
| 1430780_a_at | Pmm1          | <b>phosphomannomutase 1</b>                                             |  | -1,7 | 0,001289 |
| 1421839_at   | Abca1         | <b>ATP-binding cassette, sub-family A (ABC1), member 1</b>              |  | -1,7 | 0,007149 |
| 1438915_at   | 6720401G13Rik | <b>RIKEN cDNA 6720401G13 gene</b>                                       |  | -1,7 | 0,003665 |
| 1440295_at   | 1110057K04Rik | <b>RIKEN cDNA 1110057K04 gene</b>                                       |  | -1,7 | 0,000103 |
| 1439871_at   |               |                                                                         |  | -1,7 | 0,000572 |
| 1428233_at   | Cpsf6         | <b>cleavage and polyadenylation specific factor 6</b>                   |  | -1,7 | 0,000193 |
| 1440543_at   | Heatr5a       | <b>HEAT repeat containing 5A</b>                                        |  | -1,7 | 0,000063 |
| 1458393_at   | Srr           | <b>serine racemase</b>                                                  |  | -1,7 | 0,000043 |
| 1428404_at   | 2410025L10Rik | <b>RIKEN cDNA 2410025L10 gene</b>                                       |  | -1,7 | 0,000006 |
| 1429545_at   | Ube2i         | <b>ubiquitin-conjugating enzyme E2I</b>                                 |  | -1,7 | 0,001341 |
| 1456296_at   | 5830418K08Rik | <b>RIKEN cDNA 5830418K08 gene</b>                                       |  | -1,7 | 0,005295 |
| 1430038_at   | Gphn          | <b>gephyrin</b>                                                         |  | -1,7 | 0,000065 |
| 1452498_at   |               |                                                                         |  | -1,7 | 0,000130 |
| 1456040_at   | Sf3b2         | <b>splicing factor 3b, subunit 2</b>                                    |  | -1,7 | 0,000000 |
| 1435134_at   | Aadacl1       | <b>arylacetamide deacetylase-like 1</b>                                 |  | -1,7 | 0,015496 |
| 1455945_at   | Zfp58         | <b>zinc finger protein 58</b>                                           |  | -1,7 | 0,000326 |
| 1449011_at   | Slc12a7       | <b>solute carrier family 12, member 7</b>                               |  | -1,7 | 0,000043 |
| 1457806_at   | B830028B13Rik | <b>RIKEN cDNA B830028B13 gene</b>                                       |  | -1,7 | 0,002936 |
| 1416915_at   | Msh6          | <b>mutS homolog 6 (E. coli)</b>                                         |  | -1,7 | 0,000625 |
| 1431430_s_at | Trim59        | <b>tripartite motif-containing 59</b>                                   |  | -1,7 | 0,000525 |

|              |               |                                                                              |      |          |
|--------------|---------------|------------------------------------------------------------------------------|------|----------|
| 1451109_a_at | Nedd4         | <b>neural precursor cell expressed, developmentally down-regulated 4</b>     | -1,7 | 0,000149 |
| 1449653_at   |               |                                                                              | -1,7 | 0,000039 |
| 1422743_at   | Phka1         | <b>phosphorylase kinase alpha 1</b>                                          | -1,7 | 0,000134 |
| 1448815_at   | Ogg1          | <b>8-oxoguanine DNA-glycosylase 1</b>                                        | -1,7 | 0,000093 |
| 1437219_at   |               |                                                                              | -1,7 | 0,000443 |
| 1432978_at   | 9030607L02Rik | <b>RIKEN cDNA 9030607L02 gene</b>                                            | -1,7 | 0,000052 |
| 1426297_at   | Tcfe2a        | <b>transcription factor E2a</b>                                              | -1,7 | 0,007518 |
| 1445933_at   |               |                                                                              | -1,7 | 0,000078 |
| 1440717_at   | AA407881      | <b>expressed sequence AA407881</b>                                           | -1,7 | 0,000016 |
| 1417927_at   | Ddx19a        | <b>DEAD (Asp-Glu-Ala-Asp) box polypeptide 19a</b>                            | -1,7 | 0,000001 |
| 1450927_at   | Lztr1         | <b>leucine-zipper-like transcriptional regulator, 1</b>                      | -1,7 | 0,000064 |
| 1448592_at   | Crtap         | <b>cartilage associated protein</b>                                          | -1,7 | 0,000021 |
| 1456952_at   |               |                                                                              | -1,7 | 0,000321 |
| 1440954_at   |               |                                                                              | -1,7 | 0,000204 |
| 1435550_at   | C430014K11Rik | <b>RIKEN cDNA C430014K11 gene</b>                                            | -1,7 | 0,000001 |
| 1454699_at   | Sesn1         | <b>sestrin 1</b>                                                             | -1,7 | 0,000530 |
| 1441195_at   | 6030487A22Rik | <b>RIKEN cDNA 6030487A22 gene</b>                                            | -1,7 | 0,000672 |
| 1440905_at   | Hs2st1        | <b>heparan sulfate 2-O-sulfotransferase 1</b>                                | -1,7 | 0,002719 |
| 1430045_at   | Tsnax         | <b>translin-associated factor X</b>                                          | -1,7 | 0,000373 |
| 1458079_at   | Usp40         | <b>ubiquitin specific peptidase 40</b>                                       | -1,7 | 0,000039 |
| 1446071_at   | Steap2        | <b>six transmembrane epithelial antigen of prostate 2</b>                    | -1,7 | 0,001433 |
| 1431102_at   | Cep350        | <b>centrosomal protein 350</b>                                               | -1,7 | 0,000047 |
| 1427079_at   | Mapre3        | <b>microtubule-associated protein, RP/EB family, member 3</b>                | -1,7 | 0,002856 |
| 1427680_a_at | Nfib          | <b>nuclear factor I/B</b>                                                    | -1,7 | 0,001155 |
| 1435078_at   | Tanc2         | <b>tetratricopeptide repeat, ankyrin repeat and coiled-coil containing 2</b> | -1,7 | 0,005879 |
| 1441718_at   |               |                                                                              | -1,7 | 0,001455 |
| 1451249_at   | Trmt1         | <b>TRM1 tRNA methyltransferase 1 homolog (S. cerevisiae)</b>                 | -1,7 | 0,000013 |
| 1443114_at   | Zmym4         | <b>zinc finger, MYM-type 4</b>                                               | -1,7 | 0,000923 |
| 1446472_at   | Ahctf1        | <b>AT hook containing transcription factor 1</b>                             | -1,7 | 0,000070 |
| 1418181_at   | Ptp4a3        | <b>protein tyrosine phosphatase 4a3</b>                                      | -1,7 | 0,000980 |
| 1455627_at   | Col8a1        | <b>collagen, type VIII, alpha 1</b>                                          | -1,7 | 0,009892 |
| 1456377_x_at | Limd2         | <b>LIM domain containing 2</b>                                               | -1,7 | 0,014421 |
| 1440637_at   |               |                                                                              | -1,7 | 0,000150 |
| 1446164_at   | Tgs1          | <b>trimethylguanosine synthase homolog (S. cerevisiae)</b>                   | -1,7 | 0,001164 |
| 1418374_at   | Fxyd3         | <b>FXDY domain-containing ion transport regulator 3</b>                      | -1,7 | 0,001537 |
| 1438165_x_at | Vat1          | <b>vesicle amine transport protein 1 homolog (T californica)</b>             | -1,7 | 0,001023 |
| 1448277_at   | Pold2         | <b>polymerase (DNA directed), delta 2, regulatory subunit</b>                | -1,7 | 0,000034 |
| 1435244_at   | Vav2          | <b>vav 2 oncogene</b>                                                        | -1,7 | 0,012505 |
| 1459537_at   |               |                                                                              | -1,7 | 0,001081 |
| 1455606_at   | N4bp1         | <b>NEDD4 binding protein 1</b>                                               | -1,7 | 0,000022 |
| 1421298_a_at | Hipk1         | <b>homeodomain interacting protein kinase 1</b>                              | -1,7 | 0,000677 |



|              |               |                                                                                                  |      |          |
|--------------|---------------|--------------------------------------------------------------------------------------------------|------|----------|
| 1436034_at   | Cep68         | <b>centrosomal protein 68</b>                                                                    | -1,7 | 0,002122 |
| 1452175_at   | 1810026J23Rik | <b>RIKEN cDNA 1810026J23 gene</b>                                                                | -1,7 | 0,000007 |
| 1421271_at   | Sh3rf1        | <b>SH3 domain containing ring finger 1</b>                                                       | -1,7 | 0,000411 |
| 1459973_x_at | Dpp4          | <b>dipeptidylpeptidase 4</b>                                                                     | -1,7 | 0,000383 |
| 1424222_s_at | Rad23b        | <b>RAD23b homolog (S. cerevisiae)</b>                                                            | -1,7 | 0,000001 |
| 1416283_at   | Gart          | <b>phosphoribosylglycinamide formyltransferase</b>                                               | -1,7 | 0,001354 |
| 1451456_at   | 6430706D22Rik | <b>RIKEN cDNA 6430706D22 gene</b>                                                                | -1,7 | 0,000274 |
| 1419186_a_at | St8sia4       | <b>ST8 alpha-N-acetyl-neuraminide alpha-2,8-sialyltransferase 4</b>                              | -1,7 | 0,007986 |
| 1419270_a_at | Dut           | <b>deoxyuridine triphosphatase</b>                                                               | -1,7 | 0,007152 |
| 1434707_at   | Sbf1          | <b>SET binding factor 1</b>                                                                      | -1,7 | 0,000001 |
| 1423493_a_at | Nfix          | <b>nuclear factor I/X</b>                                                                        | -1,7 | 0,000001 |
| 1438816_at   | Ahctf1        | <b>AT hook containing transcription factor 1</b>                                                 | -1,7 | 0,000768 |
| 1443526_at   |               |                                                                                                  | -1,7 | 0,000935 |
| 1418991_at   | Bak1          | <b>BCL2-antagonist/killer 1</b>                                                                  | -1,7 | 0,000075 |
| 1421033_a_at | Tcerg1        | <b>transcription elongation regulator 1 (CA150)</b>                                              | -1,7 | 0,000539 |
| 1453212_at   | Zfp383        | <b>zinc finger protein 383</b>                                                                   | -1,7 | 0,003130 |
| 1440028_at   |               |                                                                                                  | -1,7 | 0,010176 |
| 1429739_a_at | Patz1         | <b>POZ (BTB) and AT hook containing zinc finger 1</b>                                            | -1,7 | 0,010323 |
| 1441185_at   | Msi2          | <b>Musashi homolog 2 (Drosophila)</b>                                                            | -1,7 | 0,000569 |
| 1427353_at   | Clasp1        | <b>CLIP associating protein 1</b>                                                                | -1,7 | 0,005378 |
| 1416846_a_at | Pdzn3         | <b>PDZ domain containing RING finger 3</b>                                                       | -1,7 | 0,000443 |
| 1460253_at   | Cmtm7         | <b>CKLF-like MARVEL transmembrane domain containing 7</b>                                        | -1,7 | 0,000210 |
| 1428873_a_at | Msl1          | <b>male-specific lethal 1 homolog (Drosophila)</b>                                               | -1,7 | 0,000003 |
| 1436539_at   | Clmn          | <b>calmin</b>                                                                                    | -1,7 | 0,000145 |
| 1451574_at   | Bcl9          | <b>B-cell CLL/lymphoma 9</b>                                                                     | -1,7 | 0,000006 |
| 1457392_at   |               |                                                                                                  | -1,7 | 0,000160 |
| 1425329_a_at | Cyb5r3        | <b>cytochrome b5 reductase 3</b>                                                                 | -1,7 | 0,000016 |
| 1424082_at   | Tbc1d13       | <b>TBC1 domain family, member 13</b>                                                             | -1,7 | 0,000005 |
| 1459358_at   |               |                                                                                                  | -1,7 | 0,000020 |
| 1421809_at   | Dgcr2         | <b>DiGeorge syndrome critical region gene 2</b>                                                  | -1,7 | 0,000052 |
| 1443238_at   |               |                                                                                                  | -1,7 | 0,000170 |
| 1428383_a_at | 2310021P13Rik | <b>RIKEN cDNA 2310021P13 gene</b>                                                                | -1,7 | 0,000000 |
| 1450012_x_at | Ywhag         | <b>tyrosine 3-monooxygenase/tryptophan 5-monooxygenase activation protein, gamma polypeptide</b> | -1,7 | 0,000088 |
| 1459344_at   | 9630019E01Rik | <b>RIKEN cDNA 9630019E01 gene</b>                                                                | -1,7 | 0,001207 |
| 1444466_at   | Ncald         | <b>neurocalcin delta</b>                                                                         | -1,7 | 0,000095 |
| 1439895_at   | AU021025      | <b>expressed sequence AU021025</b>                                                               | -1,7 | 0,000098 |
| 1451377_a_at | Aaas          | <b>achalasia, adrenocortical insufficiency, alacrimia</b>                                        | -1,7 | 0,000231 |
| 1420836_at   | Slc25a30      | <b>solute carrier family 25, member 30</b>                                                       | -1,7 | 0,000534 |
| 1438433_at   | Whamm         | <b>WAS protein homolog associated with actin, golgi membranes and microtubules</b>               | -1,7 | 0,000022 |
| 1416237_at   | Mpzl2         | <b>myelin protein zero-like 2</b>                                                                | -1,7 | 0,000003 |
| 1421038_a_at | Kcnn4         | <b>potassium intermediate/small conductance calcium-activated channel, subfamily N, member 4</b> | -1,7 | 0,000054 |

|              |               |                                                                                        |      |          |
|--------------|---------------|----------------------------------------------------------------------------------------|------|----------|
| 1419033_at   | Papola        | <b>poly (A) polymerase alpha</b>                                                       | -1,7 | 0,002305 |
| 1421574_at   | Rap2a         | <b>RAS related protein 2a</b>                                                          | -1,7 | 0,000094 |
| 1434209_at   | Prmt6         | <b>protein arginine N-methyltransferase 6</b>                                          | -1,7 | 0,000003 |
| 1447024_at   |               |                                                                                        | -1,7 | 0,001172 |
| 1426403_at   | Actr1b        | <b>ARP1 actin-related protein 1 homolog B, centractin beta (yeast)</b>                 | -1,7 | 0,000001 |
| 1440622_at   |               |                                                                                        | -1,7 | 0,000179 |
| 1442052_at   |               |                                                                                        | -1,7 | 0,000733 |
| 1422799_at   | Bat2          | <b>HLA-B associated transcript 2</b>                                                   | -1,7 | 0,000010 |
| 1425206_a_at | Ube3a         | <b>ubiquitin protein ligase E3A</b>                                                    | -1,7 | 0,007761 |
| 1433266_at   | 2810416A17Rik | <b>RIKEN cDNA 2810416A17 gene</b>                                                      | -1,7 | 0,014343 |
| 1425483_at   | LOC100044677  | <b>similar to thymus high mobility group box protein TOX</b>                           | -1,7 | 0,001173 |
| 1434360_s_at | Ptprg         | <b>protein tyrosine phosphatase, receptor type, G</b>                                  | -1,7 | 0,000097 |
| 1448656_at   | Cacnb3        | <b>calcium channel, voltage-dependent, beta 3 subunit</b>                              | -1,7 | 0,000014 |
| 1450537_at   | Mid2          | <b>midline 2</b>                                                                       | -1,7 | 0,001323 |
| 1459670_at   |               |                                                                                        | -1,7 | 0,000571 |
| 1453193_s_at | Kif12         | <b>kinesin family member 12</b>                                                        | -1,7 | 0,008514 |
| 1441642_at   |               |                                                                                        | -1,7 | 0,000272 |
| 1423847_at   | Ncapd2        | <b>non-SMC condensin I complex, subunit D2</b>                                         | -1,7 | 0,001182 |
| 1440317_at   | C130068B02Rik | <b>RIKEN cDNA C130068B02 gene</b>                                                      | -1,7 | 0,000933 |
| 1430075_at   | Sf3b3         | <b>splicing factor 3b, subunit 3</b>                                                   | -1,7 | 0,001748 |
| 1417786_a_at | Rgs19         | <b>regulator of G-protein signaling 19</b>                                             | -1,7 | 0,003598 |
| 1436518_at   | Usp46         | <b>ubiquitin specific peptidase 46</b>                                                 | -1,7 | 0,000069 |
| 1438862_at   | A630005I04Rik | <b>RIKEN cDNA A630005I04 gene</b>                                                      | -1,7 | 0,000571 |
| 1416050_a_at | Scarb1        | <b>scavenger receptor class B, member 1</b>                                            | -1,7 | 0,000022 |
| 1448541_at   | Klc1          | <b>kinesin light chain 1</b>                                                           | -1,7 | 0,000057 |
| 1424866_at   | Usp43         | <b>ubiquitin specific peptidase 43</b>                                                 | -1,7 | 0,000000 |
| 1422088_at   | Mycl1         | <b>v-myc myelocytomatosis viral oncogene homolog 1, lung carcinoma derived (avian)</b> | -1,7 | 0,000254 |
| 1437797_at   | Atp2a2        | <b>ATPase, Ca<sup>++</sup> transporting, cardiac muscle, slow twitch 2</b>             | -1,7 | 0,000623 |
| 1415869_a_at | Trim28        | <b>tripartite motif-containing 28</b>                                                  | -1,7 | 0,000077 |
| 1436320_at   |               |                                                                                        | -1,7 | 0,000000 |
| 1458159_at   |               |                                                                                        | -1,7 | 0,003186 |
| 1423543_at   | Swap70        | <b>SWA-70 protein</b>                                                                  | -1,7 | 0,000094 |
| 1423952_a_at | Krt7          | <b>keratin 7</b>                                                                       | -1,7 | 0,002401 |
| 1449116_a_at | Dtymk         | <b>deoxythymidylate kinase</b>                                                         | -1,7 | 0,010033 |
| 1448101_s_at | Trim27        | <b>tripartite motif-containing 27</b>                                                  | -1,7 | 0,000000 |
| 1445598_at   |               |                                                                                        | -1,7 | 0,003769 |
| 1423520_at   | Lmnb1         | <b>lamin B1</b>                                                                        | -1,7 | 0,000144 |
| 1426532_at   | Zmynd11       | <b>zinc finger, MYND domain containing 11</b>                                          | -1,7 | 0,000009 |
| 1452629_at   | Safb2         | <b>scaffold attachment factor B2</b>                                                   | -1,7 | 0,000006 |
| 1430043_at   | Ttc19         | <b>tetratricopeptide repeat domain 19</b>                                              | -1,7 | 0,000090 |
| 1433647_s_at | Rhobtb3       | <b>Rho-related BTB domain containing 3</b>                                             | -1,7 | 0,004853 |

|              |               |                                                                                                    |             |          |
|--------------|---------------|----------------------------------------------------------------------------------------------------|-------------|----------|
| 1457466_at   | AA409368      | <b>expressed sequence AA409368</b>                                                                 | <b>-1,7</b> | 0,009349 |
| 1460164_at   | Spin1         | <b>spindlin 1</b>                                                                                  | <b>-1,7</b> | 0,000006 |
| 1443991_at   | Dock1         | <b>dedicator of cytokinesis 1</b>                                                                  | <b>-1,7</b> | 0,000055 |
| 1428672_at   | Snrfp         | <b>small nuclear ribonucleoprotein polypeptide F</b>                                               | <b>-1,7</b> | 0,004049 |
| 1439127_at   | Al314180      | <b>expressed sequence Al314180</b>                                                                 | <b>-1,7</b> | 0,003002 |
| 1460237_at   | Trim8         | <b>tripartite motif protein 8</b>                                                                  | <b>-1,7</b> | 0,000002 |
| 1438001_x_at | Reep5         | <b>receptor accessory protein 5</b>                                                                | <b>-1,7</b> | 0,000000 |
| 1426296_at   | Rad52         | <b>RAD52 homolog (S. cerevisiae)</b>                                                               | <b>-1,7</b> | 0,000040 |
| 1416853_at   | Ncdn          | <b>neurochondrin</b>                                                                               | <b>-1,7</b> | 0,000004 |
| 1445152_at   |               |                                                                                                    | <b>-1,7</b> | 0,001997 |
| 1457189_at   |               |                                                                                                    | <b>-1,7</b> | 0,003540 |
| 1436791_at   | Wnt5a         | <b>wingless-related MMTV integration site 5A</b>                                                   | <b>-1,7</b> | 0,004496 |
| 1441020_at   |               |                                                                                                    | <b>-1,7</b> | 0,006760 |
| 1426513_at   | Rbm28         | <b>RNA binding motif protein 28</b>                                                                | <b>-1,7</b> | 0,000349 |
| 1448138_at   | Ppp2r4        | <b>protein phosphatase 2A, regulatory subunit B (PR 53)</b>                                        | <b>-1,7</b> | 0,000001 |
| 1427831_s_at | Zfp260        | <b>zinc finger protein 260</b>                                                                     | <b>-1,7</b> | 0,001617 |
| 1446926_at   | Pycard        | <b>PYD and CARD domain containing</b>                                                              | <b>-1,7</b> | 0,000026 |
| 1455087_at   | D7Ert715e     | <b>DNA segment, Chr 7, ERATO Doi 715, expressed</b>                                                | <b>-1,7</b> | 0,012384 |
| 1451987_at   | Arrb2         | <b>arrestin, beta 2</b>                                                                            | <b>-1,7</b> | 0,000023 |
| 1417542_at   | Rps6ka2       | <b>ribosomal protein S6 kinase, polypeptide 2</b>                                                  | <b>-1,7</b> | 0,000226 |
| 1449110_at   | Rhob          | <b>ras homolog gene family, member B</b>                                                           | <b>-1,7</b> | 0,000016 |
| 1452400_a_at | Hoxa11as      | <b>HOXA11 antisense RNA (non-protein coding)</b>                                                   | <b>-1,7</b> | 0,000540 |
| 1442824_at   | 8030497I03Rik | <b>RIKEN cDNA 8030497I03 gene</b>                                                                  | <b>-1,7</b> | 0,001292 |
| 1442959_at   | Birc6         | <b>baculoviral IAP repeat-containing 6</b>                                                         | <b>-1,7</b> | 0,000926 |
| 1426385_x_at | Ywhae         | <b>tyrosine 3-monooxygenase/tryptophan 5-monooxygenase activation protein, epsilon polypeptide</b> | <b>-1,7</b> | 0,000000 |
| 1448788_at   | Cd200         | <b>CD200 antigen</b>                                                                               | <b>-1,7</b> | 0,000036 |
| 1416124_at   | Ccnd2         | <b>cyclin D2</b>                                                                                   | <b>-1,7</b> | 0,001347 |
| 1425932_a_at | Cugbp1        | <b>CUG triplet repeat, RNA binding protein 1</b>                                                   | <b>-1,7</b> | 0,000005 |
| 1452772_at   | Tnks2         | <b>tankyrase, TRF1-interacting ankyrin-related ADP-ribose polymerase 2</b>                         | <b>-1,7</b> | 0,000196 |
| 1429065_at   | 1200009F10Rik | <b>RIKEN cDNA 1200009F10 gene</b>                                                                  | <b>-1,7</b> | 0,000538 |
| 1424570_at   | Ddx46         | <b>DEAD (Asp-Glu-Ala-Asp) box polypeptide 46</b>                                                   | <b>-1,7</b> | 0,000068 |
| 1440896_at   |               |                                                                                                    | <b>-1,7</b> | 0,001443 |
| 1452430_s_at | Sfrs1         | <b>splicing factor, arginine/serine-rich 1 (ASF/SF2)</b>                                           | <b>-1,7</b> | 0,000047 |
| 1436796_at   | Matr3         | <b>matrin 3</b>                                                                                    | <b>-1,7</b> | 0,000039 |
| 1431173_at   | Fam53b        | <b>family with sequence similarity 53, member B</b>                                                | <b>-1,7</b> | 0,001602 |
| 1454311_at   |               |                                                                                                    | <b>-1,7</b> | 0,002262 |
| 1424203_at   | Ncln          | <b>nicalin homolog (zebrafish)</b>                                                                 | <b>-1,7</b> | 0,000002 |
| 1458213_at   |               |                                                                                                    | <b>-1,7</b> | 0,000040 |
| 1442843_at   | 4933411D12Rik | <b>RIKEN cDNA 4933411D12 gene</b>                                                                  | <b>-1,7</b> | 0,000370 |
| 1433742_at   | Kank1         | <b>KN motif and ankyrin repeat domains 1</b>                                                       | <b>-1,7</b> | 0,000023 |
| 1430134_a_at | Yars2         | <b>tyrosyl-tRNA synthetase 2 (mitochondrial)</b>                                                   | <b>-1,7</b> | 0,000295 |

|              |               |                                                                       |      |          |
|--------------|---------------|-----------------------------------------------------------------------|------|----------|
| 1446510_at   |               |                                                                       | -1,7 | 0,000197 |
| 1428543_at   | Ppat          | phosphoribosyl pyrophosphate amidotransferase                         | -1,7 | 0,008199 |
| 1442111_at   | D430033H22Rik | RIKEN cDNA D430033H22 gene                                            | -1,7 | 0,000009 |
| 1448126_at   | Fam60a        | family with sequence similarity 60, member A                          | -1,7 | 0,002786 |
| 1428854_at   | Tmed8         | transmembrane emp24 domain containing 8                               | -1,7 | 0,001523 |
| 1418032_at   | Itfg2         | integrin alpha FG-GAP repeat containing 2                             | -1,7 | 0,000020 |
| 1418397_at   | Zfp275        | zinc finger protein 275                                               | -1,7 | 0,000184 |
| 1446504_at   |               |                                                                       | -1,7 | 0,000063 |
| 1423488_at   | Mmd           | monocyte to macrophage differentiation-associated                     | -1,7 | 0,000643 |
| 1457173_at   |               |                                                                       | -1,8 | 0,002016 |
| 1442464_at   | Fbxl20        | F-box and leucine-rich repeat protein 20                              | -1,8 | 0,000040 |
| 1448630_a_at | Sdhc          | succinate dehydrogenase complex, subunit C, integral membrane protein | -1,8 | 0,000001 |
| 1458156_at   | E230012J19Rik | RIKEN cDNA E230012J19 gene                                            | -1,8 | 0,009952 |
| 1423750_a_at | Sf1           | splicing factor 1                                                     | -1,8 | 0,000000 |
| 1460579_at   | Dnpep         | aspartyl aminopeptidase                                               | -1,8 | 0,001726 |
| 1416774_at   | Wee1          | WEE 1 homolog 1 (S. pombe)                                            | -1,8 | 0,000739 |
| 1425587_a_at | Ptpnj         | protein tyrosine phosphatase, receptor type, J                        | -1,8 | 0,000558 |
| 1457468_at   |               |                                                                       | -1,8 | 0,000428 |
| 1434034_at   | Cerk          | ceramide kinase                                                       | -1,8 | 0,000005 |
| 1423832_at   | Prkag2        | protein kinase, AMP-activated, gamma 2 non-catalytic subunit          | -1,8 | 0,000982 |
| 1416140_a_at | Dhx30         | DEAH (Asp-Glu-Ala-His) box polypeptide 30                             | -1,8 | 0,000004 |
| 1424407_s_at | Cbx6          | chromobox homolog 6                                                   | -1,8 | 0,010261 |
| 1424665_at   | Gpatch8       | G patch domain containing 8                                           | -1,8 | 0,000116 |
| 1417062_at   | Armc10        | armadillo repeat containing 10                                        | -1,8 | 0,001520 |
| 1430808_at   | Tbc1d5        | TBC1 domain family, member 5                                          | -1,8 | 0,000006 |
| 1417686_at   | Lgals12       | lectin, galactose binding, soluble 12                                 | -1,8 | 0,000105 |
| 1427049_s_at | Smo           | smoothened homolog (Drosophila)                                       | -1,8 | 0,002885 |
| 1428560_at   | Xpo5          | exportin 5                                                            | -1,8 | 0,000296 |
| 1455030_at   | Ptpnj         | protein tyrosine phosphatase, receptor type, J                        | -1,8 | 0,000244 |
| 1434618_at   | Crebzf        | CREB/ATF bZIP transcription factor                                    | -1,8 | 0,001334 |
| 1425273_s_at | Emp2          | epithelial membrane protein 2                                         | -1,8 | 0,000817 |
| 1434741_at   | Rreb1         | ras responsive element binding protein 1                              | -1,8 | 0,000022 |
| 1448124_at   | Gusb          | glucuronidase, beta                                                   | -1,8 | 0,007636 |
| 1422576_at   | Atxn10        | ataxin 10                                                             | -1,8 | 0,001026 |
| 1428708_x_at | Ptms          | parathyrosin                                                          | -1,8 | 0,000000 |
| 1420650_at   | Zfx3          | zinc finger homeobox 3                                                | -1,8 | 0,001803 |
| 1443721_x_at | Sbno2         | strawberry notch homolog 2 (Drosophila)                               | -1,8 | 0,000067 |
| 1430485_at   | Trpc2         | transient receptor potential cation channel, subfamily C, member 2    | -1,8 | 0,008250 |
| 1460016_at   | Tmem164       | transmembrane protein 164                                             | -1,8 | 0,000029 |
| 1439553_s_at | Nuff2         | nuclear transport factor 2                                            | -1,8 | 0,001274 |
| 1442358_at   | AA409587      | expressed sequence AA409587                                           | -1,8 | 0,001122 |

|              |               |                                                                                                    |      |          |
|--------------|---------------|----------------------------------------------------------------------------------------------------|------|----------|
| 1459150_at   |               |                                                                                                    | -1,8 | 0,002729 |
| 1430163_at   | Rab43         | <b>RAB43, member RAS oncogene family</b>                                                           | -1,8 | 0,000088 |
| 1435934_at   | Ndufab1       | <b>NADH dehydrogenase (ubiquinone) 1, alpha/beta subcomplex, 1</b>                                 | -1,8 | 0,002395 |
| 1444520_at   | Fryl          | <b>furry homolog-like (Drosophila)</b>                                                             | -1,8 | 0,000002 |
| 1447109_at   |               |                                                                                                    | -1,8 | 0,002409 |
| 1421972_s_at | Hcfc1         | <b>host cell factor C1</b>                                                                         | -1,8 | 0,000007 |
| 1439705_at   |               |                                                                                                    | -1,8 | 0,000038 |
| 1447944_at   | Zkscan1       | <b>zinc finger with KRAB and SCAN domains 1</b>                                                    | -1,8 | 0,000271 |
| 1442603_at   |               |                                                                                                    | -1,8 | 0,000696 |
| 1441445_at   | Per3          | <b>period homolog 3 (Drosophila)</b>                                                               | -1,8 | 0,001139 |
| 1435087_at   | Zfp362        | <b>zinc finger protein 362</b>                                                                     | -1,8 | 0,000023 |
| 1454686_at   | 6430706D22Rik | <b>RIKEN cDNA 6430706D22 gene</b>                                                                  | -1,8 | 0,000001 |
| 1448698_at   | Ccnd1         | <b>cyclin D1</b>                                                                                   | -1,8 | 0,000144 |
| 1448796_s_at | Tbrg4         | <b>transforming growth factor beta regulated gene 4</b>                                            | -1,8 | 0,000009 |
| 1426863_at   | Rbmx          | <b>RNA binding motif protein, X chromosome</b>                                                     | -1,8 | 0,007141 |
| 1444973_at   |               |                                                                                                    | -1,8 | 0,001317 |
| 1458111_at   | Fam20b        | <b>family with sequence similarity 20, member B</b>                                                | -1,8 | 0,000017 |
| 1441411_at   | Lims1         | <b>LIM and senescent cell antigen-like domains 1</b>                                               | -1,8 | 0,000340 |
| 1450843_a_at | Serpinh1      | <b>serine (or cysteine) peptidase inhibitor, clade H, member 1</b>                                 | -1,8 | 0,000266 |
| 1441140_at   |               |                                                                                                    | -1,8 | 0,001100 |
| 1458069_at   |               |                                                                                                    | -1,8 | 0,000596 |
| 1438244_at   | Nfib          | <b>nuclear factor I/B</b>                                                                          | -1,8 | 0,000130 |
| 1426956_a_at | Trp53bp1      | <b>transformation related protein 53 binding protein 1</b>                                         | -1,8 | 0,002049 |
| 1440965_at   | Pigl          | <b>phosphatidylinositol glycan anchor biosynthesis, class L</b>                                    | -1,8 | 0,001863 |
| 1427251_at   | Atp2a2        | <b>ATPase, Ca<sup>++</sup> transporting, cardiac muscle, slow twitch 2</b>                         | -1,8 | 0,000007 |
| 1423924_s_at | Tspan14       | <b>tetraspanin 14</b>                                                                              | -1,8 | 0,000052 |
| 1452251_at   | Nbea          | <b>neurobeachin</b>                                                                                | -1,8 | 0,001815 |
| 1430700_a_at | Pla2g7        | <b>phospholipase A2, group VII (platelet-activating factor acetylhydrolase, plasma)</b>            | -1,8 | 0,012075 |
| 1426555_at   | Scpep1        | <b>serine carboxypeptidase 1</b>                                                                   | -1,8 | 0,000002 |
| 1451364_at   | Polr3gl       | <b>polymerase (RNA) III (DNA directed) polypeptide G like</b>                                      | -1,8 | 0,000002 |
| 1434448_at   | Txlna         | <b>taxilin alpha</b>                                                                               | -1,8 | 0,000001 |
| 1447150_at   | Mycbp2        | <b>MYC binding protein 2</b>                                                                       | -1,8 | 0,002113 |
| 1422769_at   | Syncrip       | <b>synaptotagmin binding, cytoplasmic RNA interacting protein</b>                                  | -1,8 | 0,001346 |
| 1440513_at   | C80258        | <b>expressed sequence C80258</b>                                                                   | -1,8 | 0,001075 |
| 1417176_at   | Csnk1e        | <b>casein kinase 1, epsilon</b>                                                                    | -1,8 | 0,002135 |
| 1455854_a_at | Ssh1          | <b>slingshot homolog 1 (Drosophila)</b>                                                            | -1,8 | 0,000101 |
| 1422064_a_at | Zbtb20        | <b>zinc finger and BTB domain containing 20</b>                                                    | -1,8 | 0,000003 |
| 1452057_at   | Actr1b        | <b>ARP1 actin-related protein 1 homolog B, cencentractin beta (yeast)</b>                          | -1,8 | 0,000004 |
| 1438839_a_at | Ywhae         | <b>tyrosine 3-monooxygenase/tryptophan 5-monooxygenase activation protein, epsilon polypeptide</b> | -1,8 | 0,000000 |
| 1417623_at   | Slc12a2       | <b>solute carrier family 12, member 2</b>                                                          | -1,8 | 0,009263 |
| 1421018_at   | 1110018J18Rik | <b>RIKEN cDNA 1110018J18 gene</b>                                                                  | -1,8 | 0,000070 |

|              |               |                                                                                                  |             |          |
|--------------|---------------|--------------------------------------------------------------------------------------------------|-------------|----------|
| 1438437_a_at | 4933439C10Rik | <b>RIKEN cDNA 4933439C10 gene</b>                                                                | <b>-1,8</b> | 0,001174 |
| 1446719_at   | Atad2b        | <b>ATPase family, AAA domain containing 2B</b>                                                   | <b>-1,8</b> | 0,000050 |
| 1454120_a_at | Pcgf6         | <b>polycomb group ring finger 6</b>                                                              | <b>-1,8</b> | 0,009071 |
| 1458299_s_at | Nfkbie        | <b>nuclear factor of kappa light polypeptide gene enhancer in B-cells inhibitor, epsilon</b>     | <b>-1,8</b> | 0,000033 |
| 1459003_at   | Fhl1          | <b>four and a half LIM domains 1</b>                                                             | <b>-1,8</b> | 0,000324 |
| 1423141_at   | Lipa          | <b>lysosomal acid lipase A</b>                                                                   | <b>-1,8</b> | 0,006750 |
| 1442556_at   |               |                                                                                                  | <b>-1,8</b> | 0,000503 |
| 1416203_at   | Aqp1          | <b>aquaporin 1</b>                                                                               | <b>-1,8</b> | 0,001984 |
| 1426801_at   | sep-08        | <b>septin 8</b>                                                                                  | <b>-1,8</b> | 0,000002 |
| 1453740_a_at | Ccnl2         | <b>cyclin L2</b>                                                                                 | <b>-1,8</b> | 0,001109 |
| 1416514_a_at | Fscn1         | <b>fascin homolog 1, actin bundling protein (Strongylocentrotus purpuratus)</b>                  | <b>-1,8</b> | 0,013679 |
| 1439090_at   | Tbc1d23       | <b>TBC1 domain family, member 23</b>                                                             | <b>-1,8</b> | 0,000114 |
| 1448767_s_at | Gjb1          | <b>gap junction protein, beta 1</b>                                                              | <b>-1,8</b> | 0,000008 |
| 1457292_at   | Taf1d         | <b>TATA box binding protein (Tbp)-associated factor, RNA polymerase I, D</b>                     | <b>-1,8</b> | 0,014550 |
| 1442470_at   |               |                                                                                                  | <b>-1,8</b> | 0,000096 |
| 1436366_at   | Ppp1r15b      | <b>protein phosphatase 1, regulatory (inhibitor) subunit 15b</b>                                 | <b>-1,8</b> | 0,000455 |
| 1417975_at   | Kpna4         | <b>karyopherin (importin) alpha 4</b>                                                            | <b>-1,8</b> | 0,000001 |
| 1449271_a_at | Hebp2         | <b>heme binding protein 2</b>                                                                    | <b>-1,8</b> | 0,015176 |
| 1442811_at   | Rgmb          | <b>RGM domain family, member B</b>                                                               | <b>-1,8</b> | 0,001520 |
| 1440416_at   |               |                                                                                                  | <b>-1,8</b> | 0,000015 |
| 1445900_at   |               |                                                                                                  | <b>-1,8</b> | 0,000075 |
| 1440660_at   |               |                                                                                                  | <b>-1,8</b> | 0,003431 |
| 1417030_at   | Tmem206       | <b>transmembrane protein 206</b>                                                                 | <b>-1,8</b> | 0,004206 |
| 1418499_a_at | Kcne3         | <b>potassium voltage-gated channel, Isk-related subfamily, gene 3</b>                            | <b>-1,8</b> | 0,012274 |
| 1439041_at   | Slc39a10      | <b>solute carrier family 39 (zinc transporter), member 10</b>                                    | <b>-1,8</b> | 0,002271 |
| 1429719_at   | Foxp4         | <b>forkhead box P4</b>                                                                           | <b>-1,8</b> | 0,000000 |
| 1440038_at   | B430007K19Rik | <b>RIKEN cDNA B430007K19 gene</b>                                                                | <b>-1,8</b> | 0,002023 |
| 1420816_at   | Ywhag         | <b>tyrosine 3-monooxygenase/tryptophan 5-monooxygenase activation protein, gamma polypeptide</b> | <b>-1,8</b> | 0,000000 |
| 1416818_at   | Parva         | <b>parvin, alpha</b>                                                                             | <b>-1,8</b> | 0,000126 |
| 1459315_at   |               |                                                                                                  | <b>-1,8</b> | 0,000082 |
| 1416661_at   | Eif3a         | <b>eukaryotic translation initiation factor 3, subunit A</b>                                     | <b>-1,8</b> | 0,000022 |
| 1458385_at   | Hspa4l        | <b>heat shock protein 4 like</b>                                                                 | <b>-1,8</b> | 0,000148 |
| 1436907_at   | Nav1          | <b>neuron navigator 1</b>                                                                        | <b>-1,8</b> | 0,004198 |
| 1424062_at   | Ube2d1        | <b>ubiquitin-conjugating enzyme E2D 1, UBC4/5 homolog (yeast)</b>                                | <b>-1,8</b> | 0,000084 |
| 1439580_at   | B930053N05Rik | <b>RIKEN cDNA B930053N05 gene</b>                                                                | <b>-1,8</b> | 0,003301 |
| 1455218_at   | 6330503K22Rik | <b>RIKEN cDNA 6330503K22 gene</b>                                                                | <b>-1,8</b> | 0,004536 |
| 1442107_at   | Flnb          | <b>filamin, beta</b>                                                                             | <b>-1,8</b> | 0,003276 |
| 1424772_at   | H2afj         | <b>H2A histone family, member J</b>                                                              | <b>-1,8</b> | 0,000004 |
| 1456043_at   | Usp22         | <b>ubiquitin specific peptidase 22</b>                                                           | <b>-1,8</b> | 0,000064 |
| 1458708_at   |               |                                                                                                  | <b>-1,8</b> | 0,000623 |
| 1449041_a_at | Trip6         | <b>thyroid hormone receptor interactor 6</b>                                                     | <b>-1,8</b> | 0,000495 |

|              |               |                                                                                    |             |          |
|--------------|---------------|------------------------------------------------------------------------------------|-------------|----------|
| 1427152_at   | Qser1         | <b>glutamine and serine rich 1</b>                                                 | <b>-1,8</b> | 0,000910 |
| 1448056_at   | Huwe1         | <b>HECT, UBA and WWE domain containing 1</b>                                       | <b>-1,8</b> | 0,000048 |
| 1456553_at   |               |                                                                                    | <b>-1,8</b> | 0,002069 |
| 1460032_at   |               |                                                                                    | <b>-1,8</b> | 0,000112 |
| 1455101_at   | Phactr2       | <b>phosphatase and actin regulator 2</b>                                           | <b>-1,8</b> | 0,000009 |
| 1460549_a_at | Cdc23         | <b>CDC23 (cell division cycle 23, yeast, homolog)</b>                              | <b>-1,8</b> | 0,000011 |
| 1458414_at   | D2Erd93e      | <b>DNA segment, Chr 2, ERATO Doi 93, expressed</b>                                 | <b>-1,8</b> | 0,000070 |
| 1455655_a_at | Tardbp        | <b>TAR DNA binding protein</b>                                                     | <b>-1,8</b> | 0,002629 |
| 1424332_at   | Rab40c        | <b>Rab40c, member RAS oncogene family</b>                                          | <b>-1,8</b> | 0,001473 |
| 1457214_at   |               |                                                                                    | <b>-1,8</b> | 0,000312 |
| 1435343_at   | Dock10        | <b>dedicator of cytokinesis 10</b>                                                 | <b>-1,8</b> | 0,013942 |
| 1460403_at   | Psip1         | <b>PC4 and SFRS1 interacting protein 1</b>                                         | <b>-1,8</b> | 0,006355 |
| 1430039_at   | Cdkal1        | <b>CDK5 regulatory subunit associated protein 1-like 1</b>                         | <b>-1,8</b> | 0,000014 |
| 1450983_at   | Akap8         | <b>A kinase (PRKA) anchor protein 8</b>                                            | <b>-1,8</b> | 0,000091 |
| 1428430_at   | Rgmb          | <b>RGM domain family, member B</b>                                                 | <b>-1,8</b> | 0,000002 |
| 1443258_at   | Foxp1         | <b>forkhead box P1</b>                                                             | <b>-1,8</b> | 0,000013 |
| 1452708_a_at | Luc7l         | <b>Luc7 homolog (S. cerevisiae)-like</b>                                           | <b>-1,8</b> | 0,005856 |
| 1440465_at   |               |                                                                                    | <b>-1,8</b> | 0,000039 |
| 1452482_at   | ErbB3         | <b>v-erb-b2 erythroblastic leukemia viral oncogene homolog 3 (avian)</b>           | <b>-1,8</b> | 0,003235 |
| 1419654_at   | Tle3          | <b>transducin-like enhancer of split 3, homolog of Drosophila E(spl)</b>           | <b>-1,8</b> | 0,000004 |
| 1426692_at   | Ccdc97        | <b>coiled-coil domain containing 97</b>                                            | <b>-1,8</b> | 0,000002 |
| 1432344_a_at | Aplp2         | <b>amyloid beta (A4) precursor-like protein 2</b>                                  | <b>-1,8</b> | 0,000214 |
| 1454636_at   | Cbx5          | <b>chromobox homolog 5 (Drosophila HP1a)</b>                                       | <b>-1,8</b> | 0,000211 |
| 1426849_at   | Sec24b        | <b>Sec24 related gene family, member B (S. cerevisiae)</b>                         | <b>-1,8</b> | 0,000356 |
| 1453319_at   | Ccar1         | <b>cell division cycle and apoptosis regulator 1</b>                               | <b>-1,8</b> | 0,006277 |
| 1416792_at   | Ppm1g         | <b>protein phosphatase 1G (formerly 2C), magnesium-dependent, gamma isoform</b>    | <b>-1,8</b> | 0,000001 |
| 1425461_at   | Fbxw11        | <b>F-box and WD-40 domain protein 11</b>                                           | <b>-1,8</b> | 0,000003 |
| 1450781_at   | Hmga2         | <b>high mobility group AT-hook 2</b>                                               | <b>-1,8</b> | 0,000065 |
| 1440139_at   |               |                                                                                    | <b>-1,8</b> | 0,003256 |
| 1447615_at   |               |                                                                                    | <b>-1,8</b> | 0,000864 |
| 1443522_s_at | Phip          | <b>pleckstrin homology domain interacting protein</b>                              | <b>-1,8</b> | 0,001687 |
| 1460342_s_at | Mprip         | <b>myosin phosphatase Rho interacting protein</b>                                  | <b>-1,8</b> | 0,000120 |
| 1445618_at   |               |                                                                                    | <b>-1,8</b> | 0,003776 |
| 1448012_at   | C76336        | <b>expressed sequence C76336</b>                                                   | <b>-1,8</b> | 0,000018 |
| 1427956_at   | Pcgf1         | <b>polycomb group ring finger 1</b>                                                | <b>-1,8</b> | 0,000006 |
| 1439802_at   | Stk35         | <b>serine/threonine kinase 35</b>                                                  | <b>-1,8</b> | 0,000006 |
| 1433776_at   | Lhfp          | <b>lipoma HMGIC fusion partner</b>                                                 | <b>-1,8</b> | 0,004187 |
| 1446892_at   |               |                                                                                    | <b>-1,8</b> | 0,002123 |
| 1441894_s_at | Grasp         | <b>GRP1 (general receptor for phosphoinositides 1)-associated scaffold protein</b> | <b>-1,8</b> | 0,000073 |
| 1427844_a_at | Cebpb         | <b>CCAAT/enhancer binding protein (C/EBP), beta</b>                                | <b>-1,8</b> | 0,004515 |
| 1428732_at   | 1700008J07Rik | <b>RIKEN cDNA 1700008J07 gene</b>                                                  | <b>-1,8</b> | 0,000003 |

|              |               |                                                                                         |      |          |
|--------------|---------------|-----------------------------------------------------------------------------------------|------|----------|
| 1440586_at   | B430203I24Rik | <b>RIKEN cDNA B430203I24 gene</b>                                                       | -1,8 | 0,000060 |
| 1455084_x_at | Shmt2         | <b>serine hydroxymethyltransferase 2 (mitochondrial)</b>                                | -1,8 | 0,000303 |
| 1437775_at   | Dlst          | <b>dihydrolipoamide S-succinyltransferase (E2 component of 2-oxo-glutarate complex)</b> | -1,8 | 0,000077 |
| 1427414_at   | Prkar2a       | <b>protein kinase, cAMP dependent regulatory, type II alpha</b>                         | -1,8 | 0,000015 |
| 1435460_at   | Prkg2         | <b>protein kinase, cGMP-dependent, type II</b>                                          | -1,8 | 0,013502 |
| 1434922_at   | Phf12         | <b>PHD finger protein 12</b>                                                            | -1,8 | 0,000026 |
| 1436508_at   | Mlec          | <b>malectin</b>                                                                         | -1,8 | 0,000009 |
| 1448780_at   | Slc12a2       | <b>solute carrier family 12, member 2</b>                                               | -1,8 | 0,003922 |
| 1454881_s_at | Upk3b         | <b>uroplakin 3B</b>                                                                     | -1,8 | 0,005580 |
| 1458703_at   |               |                                                                                         | -1,8 | 0,000194 |
| 1455874_at   | Tmem179b      | <b>transmembrane protein 179B</b>                                                       | -1,8 | 0,002335 |
| 1416959_at   | Nr1d2         | <b>nuclear receptor subfamily 1, group D, member 2</b>                                  | -1,8 | 0,000328 |
| 1435349_at   | Nrp2          | <b>neuropilin 2</b>                                                                     | -1,8 | 0,000558 |
| 1417293_at   | Hs6st1        | <b>heparan sulfate 6-O-sulfotransferase 1</b>                                           | -1,8 | 0,000002 |
| 1450382_at   | Nf2           | <b>neurofibromatosis 2</b>                                                              | -1,8 | 0,000001 |
| 1449554_at   | Tle3          | <b>transducin-like enhancer of split 3, homolog of Drosophila E(spl)</b>                | -1,8 | 0,000018 |
| 1449268_at   | Gfpt1         | <b>glutamine fructose-6-phosphate transaminase 1</b>                                    | -1,8 | 0,000014 |
| 1440490_at   |               |                                                                                         | -1,8 | 0,000001 |
| 1427397_at   | 2810046L04Rik | <b>RIKEN cDNA 2810046L04 gene</b>                                                       | -1,8 | 0,000014 |
| 1443153_at   |               |                                                                                         | -1,8 | 0,000031 |
| 1444764_at   | A130022J21Rik | <b>RIKEN cDNA A130022J21 gene</b>                                                       | -1,8 | 0,000023 |
| 1435905_at   | D3Erd300e     | <b>DNA segment, Chr 3, ERATO Doi 300, expressed</b>                                     | -1,8 | 0,000025 |
| 1439344_at   |               |                                                                                         | -1,8 | 0,000359 |
| 1435889_at   | Mark2         | <b>MAP/microtubule affinity-regulating kinase 2</b>                                     | -1,8 | 0,000222 |
| 1417057_a_at | Ppid          | <b>peptidylprolyl isomerase D (cyclophilin D)</b>                                       | -1,8 | 0,000674 |
| 1446299_at   |               |                                                                                         | -1,8 | 0,000745 |
| 1435122_x_at | Dnmt1         | <b>DNA methyltransferase (cytosine-5) 1</b>                                             | -1,8 | 0,009088 |
| 1428065_at   | Slc44a2       | <b>solute carrier family 44, member 2</b>                                               | -1,8 | 0,000125 |
| 1438208_at   | Taok2         | <b>TAO kinase 2</b>                                                                     | -1,8 | 0,000008 |
| 1422681_at   | Ctr9          | <b>Ctr9, Paf1/RNA polymerase II complex component, homolog (S. cerevisiae)</b>          | -1,8 | 0,000015 |
| 1417476_at   | Fbxw5         | <b>F-box and WD-40 domain protein 5</b>                                                 | -1,8 | 0,000011 |
| 1447034_at   |               |                                                                                         | -1,8 | 0,002261 |
| 1426381_at   | Pprc1         | <b>peroxisome proliferative activated receptor, gamma, coactivator-related 1</b>        | -1,8 | 0,001866 |
| 1460259_s_at | Clca2         | <b>chloride channel calcium activated 2</b>                                             | -1,8 | 0,000009 |
| 1444785_at   |               |                                                                                         | -1,8 | 0,000094 |
| 1435338_at   | Cdk6          | <b>cyclin-dependent kinase 6</b>                                                        | -1,8 | 0,000631 |
| 1438888_at   | Gmcl1         | <b>germ cell-less homolog 1 (Drosophila)</b>                                            | -1,8 | 0,000255 |
| 1424048_a_at | Cyb5r1        | <b>cytochrome b5 reductase 1</b>                                                        | -1,8 | 0,000032 |
| 1452237_at   | Agfg1         | <b>ArfGAP with FG repeats 1</b>                                                         | -1,8 | 0,002759 |
| 1436524_at   | 4833438C02Rik | <b>RIKEN cDNA 4833438C02 gene</b>                                                       | -1,8 | 0,000007 |
| 1454106_a_at | Cxxc1         | <b>CXXC finger 1 (PHD domain)</b>                                                       | -1,8 | 0,000002 |



|              |               |                                                                         |             |          |
|--------------|---------------|-------------------------------------------------------------------------|-------------|----------|
| 1424556_at   | Pycr1         | <b>pyrroline-5-carboxylate reductase 1</b>                              | <b>-1,8</b> | 0,002415 |
| 1431530_a_at | Tspan5        | <b>tetraspanin 5</b>                                                    | <b>-1,8</b> | 0,000135 |
| 1439572_at   |               |                                                                         | <b>-1,8</b> | 0,001152 |
| 1422474_at   | Pde4b         | <b>phosphodiesterase 4B, cAMP specific</b>                              | <b>-1,8</b> | 0,000361 |
| 1425993_a_at | Hsph1         | <b>heat shock 105kDa/110kDa protein 1</b>                               | <b>-1,8</b> | 0,006020 |
| 1457339_at   |               |                                                                         | <b>-1,8</b> | 0,001687 |
| 1419838_s_at | Plk4          | <b>polo-like kinase 4 (Drosophila)</b>                                  | <b>-1,8</b> | 0,013632 |
| 1426117_a_at | Slc19a2       | <b>solute carrier family 19 (thiamine transporter), member 2</b>        | <b>-1,8</b> | 0,000009 |
| 1419248_at   | Rgs2          | <b>regulator of G-protein signaling 2</b>                               | <b>-1,8</b> | 0,000197 |
| 1442171_at   | Prpf40a       | <b>PRP40 pre-mRNA processing factor 40 homolog A (yeast)</b>            | <b>-1,8</b> | 0,000252 |
| 1460113_at   | B930093H17Rik | <b>RIKEN cDNA B930093H17 gene</b>                                       | <b>-1,8</b> | 0,000005 |
| 1439931_at   | Gsk3b         | <b>glycogen synthase kinase 3 beta</b>                                  | <b>-1,8</b> | 0,000012 |
| 1428850_x_at | Cd99          | <b>CD99 antigen</b>                                                     | <b>-1,8</b> | 0,000007 |
| 1439305_at   |               |                                                                         | <b>-1,8</b> | 0,000026 |
| 1451956_a_at | Sigmar1       | <b>sigma non-opioid intracellular receptor 1</b>                        | <b>-1,8</b> | 0,000007 |
| 1433751_at   | Slc39a10      | <b>solute carrier family 39 (zinc transporter), member 10</b>           | <b>-1,8</b> | 0,010990 |
| 1424375_s_at | Gimap4        | <b>GTPase, IMAP family member 4</b>                                     | <b>-1,8</b> | 0,009208 |
| 1437283_at   | Tnpo2         | <b>transportin 2 (importin 3, karyopherin beta 2b)</b>                  | <b>-1,8</b> | 0,000000 |
| 1438916_x_at | 6720401G13Rik | <b>RIKEN cDNA 6720401G13 gene</b>                                       | <b>-1,8</b> | 0,005139 |
| 1418727_at   | Nup155        | <b>nucleoporin 155</b>                                                  | <b>-1,8</b> | 0,009575 |
| 1439773_at   | Ly6e          | <b>lymphocyte antigen 6 complex, locus E</b>                            | <b>-1,8</b> | 0,004133 |
| 1423430_at   | Mybbp1a       | <b>MYB binding protein (P160) 1a</b>                                    | <b>-1,8</b> | 0,000042 |
| 1441482_at   | Map2k6        | <b>mitogen-activated protein kinase kinase 6</b>                        | <b>-1,8</b> | 0,012957 |
| 1443115_at   |               |                                                                         | <b>-1,8</b> | 0,001503 |
| 1444231_at   |               |                                                                         | <b>-1,8</b> | 0,000892 |
| 1454817_at   | Utp18         | <b>UTP18, small subunit (SSU) processome component, homolog (yeast)</b> | <b>-1,8</b> | 0,004522 |
| 1438802_at   | Foxp1         | <b>forkhead box P1</b>                                                  | <b>-1,8</b> | 0,000580 |
| 1424760_a_at | Smyd2         | <b>SET and MYND domain containing 2</b>                                 | <b>-1,8</b> | 0,000319 |
| 1437667_a_at | Bach2         | <b>BTB and CNC homology 2</b>                                           | <b>-1,8</b> | 0,000086 |
| 1452905_at   | Meg3          | <b>maternally expressed 3</b>                                           | <b>-1,8</b> | 0,001167 |
| 1451104_a_at | Snmp70        | <b>small nuclear ribonucleoprotein 70 (U1)</b>                          | <b>-1,8</b> | 0,001109 |
| 1416295_a_at | Il2rg         | <b>interleukin 2 receptor, gamma chain</b>                              | <b>-1,8</b> | 0,005165 |
| 1420505_a_at | Stxbp1        | <b>syntaxin binding protein 1</b>                                       | <b>-1,8</b> | 0,000097 |
| 1451115_at   | Pias3         | <b>protein inhibitor of activated STAT 3</b>                            | <b>-1,8</b> | 0,000003 |
| 1434031_at   | Zfp692        | <b>zinc finger protein 692</b>                                          | <b>-1,8</b> | 0,000115 |
| 1432372_a_at | Spr           | <b>sepiapterin reductase</b>                                            | <b>-1,8</b> | 0,000029 |
| 1419185_a_at | Mlxipl        | <b>MLX interacting protein-like</b>                                     | <b>-1,8</b> | 0,000007 |
| 1431031_at   | Arid4b        | <b>AT rich interactive domain 4B (RBP1-like)</b>                        | <b>-1,8</b> | 0,000311 |
| 1444150_at   | Epb4.1        | <b>erythrocyte protein band 4.1</b>                                     | <b>-1,8</b> | 0,000135 |
| 1441145_at   | Phf21a        | <b>PHD finger protein 21A</b>                                           | <b>-1,8</b> | 0,002293 |
| 1430920_at   | Trmt11        | <b>tRNA methyltransferase 11 homolog (S. cerevisiae)</b>                | <b>-1,8</b> | 0,000019 |

|              |               |                                                                 |      |          |
|--------------|---------------|-----------------------------------------------------------------|------|----------|
| 1442538_at   |               |                                                                 | -1,8 | 0,000296 |
| 1455269_a_at | Coro1a        | coronin, actin binding protein 1A                               | -1,8 | 0,009756 |
| 1456758_at   | 9930017N22Rik | RIKEN cDNA 9930017N22 gene                                      | -1,8 | 0,000014 |
| 1428281_at   | Trub1         | TruB pseudouridine (psi) synthase homolog 1 (E. coli)           | -1,8 | 0,000051 |
| 1458648_at   | AU042950      | expressed sequence AU042950                                     | -1,8 | 0,000049 |
| 1456659_at   | LOC552902     | hypothetical LOC552902                                          | -1,8 | 0,001805 |
| 1457047_at   |               |                                                                 | -1,8 | 0,000981 |
| 1424544_at   | Nrbp2         | nuclear receptor binding protein 2                              | -1,9 | 0,000183 |
| 1443755_at   |               |                                                                 | -1,9 | 0,000039 |
| 1423831_at   | Prkag2        | protein kinase, AMP-activated, gamma 2 non-catalytic subunit    | -1,9 | 0,000013 |
| 1448881_at   | Hp            | haptoglobin                                                     | -1,9 | 0,005092 |
| 1434296_at   | BC049349      | cDNA sequence BC049349                                          | -1,9 | 0,000012 |
| 1447096_at   |               |                                                                 | -1,9 | 0,001918 |
| 1442309_at   |               |                                                                 | -1,9 | 0,000034 |
| 1423723_s_at | Tardbp        | TAR DNA binding protein                                         | -1,9 | 0,004280 |
| 1451799_at   | Ccdc25        | coiled-coil domain containing 25                                | -1,9 | 0,000296 |
| 1458426_at   |               |                                                                 | -1,9 | 0,000289 |
| 1438751_at   | Slc30a10      | solute carrier family 30, member 10                             | -1,9 | 0,001175 |
| 1448096_at   | Ogfod1        | 2-oxoglutarate and iron-dependent oxygenase domain containing 1 | -1,9 | 0,000826 |
| 1455521_at   | Klf12         | Kruppel-like factor 12                                          | -1,9 | 0,002764 |
| 1448646_at   | Wdr12         | WD repeat domain 12                                             | -1,9 | 0,002206 |
| 1424040_at   | Mtap7d1       | microtubule-associated protein 7 domain containing 1            | -1,9 | 0,000015 |
| 1446474_at   |               |                                                                 | -1,9 | 0,000007 |
| 1459701_x_at |               |                                                                 | -1,9 | 0,000019 |
| 1443489_at   |               |                                                                 | -1,9 | 0,000070 |
| 1431118_at   | 6720427H10Rik | RIKEN cDNA 6720427H10 gene                                      | -1,9 | 0,000009 |
| 1434847_at   | Cnnm4         | cyclin M4                                                       | -1,9 | 0,000627 |
| 1416184_s_at | Hmga1         | high mobility group AT-hook 1                                   | -1,9 | 0,000003 |
| 1457746_at   |               |                                                                 | -1,9 | 0,000005 |
| 1452154_at   | lars          | isoleucine-tRNA synthetase                                      | -1,9 | 0,000848 |
| 1448346_at   | Cfl1          | cofilin 1, non-muscle                                           | -1,9 | 0,000002 |
| 1457913_at   | 5730601F06Rik | RIKEN cDNA 5730601F06 gene                                      | -1,9 | 0,011078 |
| 1427708_a_at | Nf2           | neurofibromatosis 2                                             | -1,9 | 0,000663 |
| 1432108_at   | Pcgf6         | polycomb group ring finger 6                                    | -1,9 | 0,001312 |
| 1443167_at   |               |                                                                 | -1,9 | 0,000982 |
| 1440799_s_at | Farp2         | FERM, RhoGEF and pleckstrin domain protein 2                    | -1,9 | 0,000384 |
| 1416484_at   | Ttc3          | tetratricopeptide repeat domain 3                               | -1,9 | 0,000505 |
| 1445867_at   | AL023008      | expressed sequence AL023008                                     | -1,9 | 0,000084 |
| 1415836_at   | Aldh18a1      | aldehyde dehydrogenase 18 family, member A1                     | -1,9 | 0,000002 |
| 1433806_x_at | Calr          | calreticulin                                                    | -1,9 | 0,000004 |
| 1424927_at   | Glpr1         | GLI pathogenesis-related 1 (glioma)                             | -1,9 | 0,012266 |

|              |               |                                                                                   |             |          |
|--------------|---------------|-----------------------------------------------------------------------------------|-------------|----------|
| 1447929_at   | Ssh3          | <b>slingshot homolog 3 (Drosophila)</b>                                           | <b>-1,9</b> | 0,000000 |
| 1427978_at   | 4732418C07Rik | <b>RIKEN cDNA 4732418C07 gene</b>                                                 | <b>-1,9</b> | 0,000000 |
| 1460096_at   |               |                                                                                   | <b>-1,9</b> | 0,000042 |
| 1417655_a_at | Ars2          | <b>arsenate resistance protein 2</b>                                              | <b>-1,9</b> | 0,000022 |
| 1456328_at   | Bank1         | <b>B-cell scaffold protein with ankyrin repeats 1</b>                             | <b>-1,9</b> | 0,007419 |
| 1426533_at   | Nop56         | <b>NOP56 ribonucleoprotein homolog (yeast)</b>                                    | <b>-1,9</b> | 0,004610 |
| 1457356_at   |               |                                                                                   | <b>-1,9</b> | 0,000244 |
| 1444372_at   |               |                                                                                   | <b>-1,9</b> | 0,000092 |
| 1440464_at   | Elavl1        | <b>ELAV (embryonic lethal, abnormal vision, Drosophila)-like 1 (Hu antigen R)</b> | <b>-1,9</b> | 0,001259 |
| 1443624_at   |               |                                                                                   | <b>-1,9</b> | 0,000344 |
| 1418167_at   | Tcfap4        | <b>transcription factor AP4</b>                                                   | <b>-1,9</b> | 0,000001 |
| 1423161_s_at | Spred1        | <b>sprouty protein with EVH-1 domain 1, related sequence</b>                      | <b>-1,9</b> | 0,000092 |
| 1442239_at   |               |                                                                                   | <b>-1,9</b> | 0,000125 |
| 1456514_at   |               |                                                                                   | <b>-1,9</b> | 0,000117 |
| 1436729_at   | Afap1         | <b>actin filament associated protein 1</b>                                        | <b>-1,9</b> | 0,000979 |
| 1447122_at   | Psmc1         | <b>proteasome (prosome, macropain) 26S subunit, non-ATPase, 1</b>                 | <b>-1,9</b> | 0,000228 |
| 1436456_at   | Slc38a9       | <b>solute carrier family 38, member 9</b>                                         | <b>-1,9</b> | 0,000630 |
| 1456916_at   | Nsd1          | <b>nuclear receptor-binding SET-domain protein 1</b>                              | <b>-1,9</b> | 0,000736 |
| 1444506_at   |               |                                                                                   | <b>-1,9</b> | 0,001276 |
| 1423143_at   | Gtpbp4        | <b>GTP binding protein 4</b>                                                      | <b>-1,9</b> | 0,001747 |
| 1430388_a_at | Sulf2         | <b>sulfatase 2</b>                                                                | <b>-1,9</b> | 0,000006 |
| 1425634_a_at | Tnk1          | <b>tyrosine kinase, non-receptor, 1</b>                                           | <b>-1,9</b> | 0,000024 |
| 1416871_at   | Adam8         | <b>a disintegrin and metallopeptidase domain 8</b>                                | <b>-1,9</b> | 0,015271 |
| 1448019_at   | Taok3         | <b>TAO kinase 3</b>                                                               | <b>-1,9</b> | 0,000254 |
| 1437917_at   | D530037H12Rik | <b>RIKEN cDNA D530037H12 gene</b>                                                 | <b>-1,9</b> | 0,000418 |
| 1448221_at   | Bat1a         | <b>HLA-B-associated transcript 1A</b>                                             | <b>-1,9</b> | 0,000071 |
| 1428207_at   | Bcl7a         | <b>B-cell CLL/lymphoma 7A</b>                                                     | <b>-1,9</b> | 0,005081 |
| 1435381_at   | 2610110G12Rik | <b>RIKEN cDNA 2610110G12 gene</b>                                                 | <b>-1,9</b> | 0,000605 |
| 1421958_at   | L1cam         | <b>L1 cell adhesion molecule</b>                                                  | <b>-1,9</b> | 0,000799 |
| 1443554_at   | Ssbp3         | <b>single-stranded DNA binding protein 3</b>                                      | <b>-1,9</b> | 0,003256 |
| 1442473_at   |               |                                                                                   | <b>-1,9</b> | 0,001107 |
| 1420881_at   | Acd           | <b>adrenocortical dysplasia</b>                                                   | <b>-1,9</b> | 0,000001 |
| 1458309_at   |               |                                                                                   | <b>-1,9</b> | 0,000012 |
| 1434118_at   | Mul1          | <b>mitochondrial ubiquitin ligase activator of NFKB 1</b>                         | <b>-1,9</b> | 0,000019 |
| 1433491_at   | Epb4.1l2      | <b>erythrocyte protein band 4.1-like 2</b>                                        | <b>-1,9</b> | 0,000923 |
| 1418070_at   | Cdyl          | <b>chromodomain protein, Y chromosome-like</b>                                    | <b>-1,9</b> | 0,000010 |
| 1457302_at   |               |                                                                                   | <b>-1,9</b> | 0,002339 |
| 1442632_at   |               |                                                                                   | <b>-1,9</b> | 0,001868 |
| 1450854_at   | Pa2g4         | <b>proliferation-associated 2G4</b>                                               | <b>-1,9</b> | 0,000402 |
| 1446001_at   |               |                                                                                   | <b>-1,9</b> | 0,003211 |
| 1458618_at   |               |                                                                                   | <b>-1,9</b> | 0,000144 |

|              |               |                                                                                                           |             |          |
|--------------|---------------|-----------------------------------------------------------------------------------------------------------|-------------|----------|
| 1434908_at   | Scaf1         | <b>SR-related CTD-associated factor 1</b>                                                                 | <b>-1,9</b> | 0,000014 |
| 1417381_at   | C1qa          | <b>complement component 1, q subcomponent, alpha polypeptide</b>                                          | <b>-1,9</b> | 0,009906 |
| 1428772_at   | Xpot          | <b>exportin, tRNA (nuclear export receptor for tRNAs)</b>                                                 | <b>-1,9</b> | 0,001310 |
| 1419032_at   | Papola        | <b>poly (A) polymerase alpha</b>                                                                          | <b>-1,9</b> | 0,000144 |
| 1441558_at   | D230044B12Rik | <b>RIKEN cDNA D230044B12 gene</b>                                                                         | <b>-1,9</b> | 0,000351 |
| 1416814_at   | Tia1          | <b>cytotoxic granule-associated RNA binding protein 1</b>                                                 | <b>-1,9</b> | 0,008406 |
| 1454665_at   | Irf2bp2       | <b>interferon regulatory factor 2 binding protein 2</b>                                                   | <b>-1,9</b> | 0,000985 |
| 1446861_at   | Gns           | <b>glucosamine (N-acetyl)-6-sulfatase</b>                                                                 | <b>-1,9</b> | 0,000035 |
| 1450704_at   | Ihh           | <b>Indian hedgehog</b>                                                                                    | <b>-1,9</b> | 0,000011 |
| 1450839_at   | D0H4S114      | <b>DNA segment, human D4S114</b>                                                                          | <b>-1,9</b> | 0,003908 |
| 1434191_at   | Tmem195       | <b>transmembrane protein 195</b>                                                                          | <b>-1,9</b> | 0,004079 |
| 1457072_at   | Bcl11a        | <b>B-cell CLL/lymphoma 11A (zinc finger protein)</b>                                                      | <b>-1,9</b> | 0,010050 |
| 1457369_at   |               |                                                                                                           | <b>-1,9</b> | 0,000000 |
| 1445340_at   | Mycbp2        | <b>MYC binding protein 2</b>                                                                              | <b>-1,9</b> | 0,004028 |
| 1427322_at   | Brwd1         | <b>bromodomain and WD repeat domain containing 1</b>                                                      | <b>-1,9</b> | 0,000486 |
| 1415798_at   | Ddr1          | <b>discoidin domain receptor family, member 1</b>                                                         | <b>-1,9</b> | 0,000017 |
| 1419655_at   | Tle3          | <b>transducin-like enhancer of split 3, homolog of Drosophila E(spl)</b>                                  | <b>-1,9</b> | 0,000009 |
| 1421026_at   | Gna12         | <b>guanine nucleotide binding protein, alpha 12</b>                                                       | <b>-1,9</b> | 0,000201 |
| 1427883_a_at | Col3a1        | <b>collagen, type III, alpha 1</b>                                                                        | <b>-1,9</b> | 0,010875 |
| 1457593_at   | 2610202C22Rik | <b>RIKEN cDNA 2610202C22 gene</b>                                                                         | <b>-1,9</b> | 0,000018 |
| 1442916_at   |               |                                                                                                           | <b>-1,9</b> | 0,000798 |
| 1416614_at   | Eid1          | <b>EP300 interacting inhibitor of differentiation 1</b>                                                   | <b>-1,9</b> | 0,000005 |
| 1452690_at   | Khsrp         | <b>KH-type splicing regulatory protein</b>                                                                | <b>-1,9</b> | 0,000003 |
| 1449944_a_at | Sec61a2       | <b>Sec61, alpha subunit 2 (S. cerevisiae)</b>                                                             | <b>-1,9</b> | 0,000067 |
| 1452560_a_at | Nfya          | <b>nuclear transcription factor-Y alpha</b>                                                               | <b>-1,9</b> | 0,000009 |
| 1453399_at   | Ccnt2         | <b>cyclin T2</b>                                                                                          | <b>-1,9</b> | 0,000011 |
| 1431993_a_at | Rnf38         | <b>ring finger protein 38</b>                                                                             | <b>-1,9</b> | 0,000008 |
| 1448375_at   | Tm9sf3        | <b>transmembrane 9 superfamily member 3</b>                                                               | <b>-1,9</b> | 0,000002 |
| 1448117_at   | Kitl          | <b>kit ligand</b>                                                                                         | <b>-1,9</b> | 0,000121 |
| 1449202_at   | Sema4g        | <b>sema domain, immunoglobulin domain (Ig), transmembrane domain (TM) and short cytoplasmic domain, (</b> | <b>-1,9</b> | 0,000001 |
| 1425233_at   | 2210407C18Rik | <b>RIKEN cDNA 2210407C18 gene</b>                                                                         | <b>-1,9</b> | 0,010084 |
| 1452336_at   | Zfp395        | <b>zinc finger protein 395</b>                                                                            | <b>-1,9</b> | 0,000002 |
| 1452377_at   | Mll1          | <b>myeloid/lymphoid or mixed-lineage leukemia 1</b>                                                       | <b>-1,9</b> | 0,000293 |
| 1450116_at   | D3Erd300e     | <b>DNA segment, Chr 3, ERATO Doi 300, expressed</b>                                                       | <b>-1,9</b> | 0,000131 |
| 1418893_at   | Pbx2          | <b>pre B-cell leukemia transcription factor 2</b>                                                         | <b>-1,9</b> | 0,000001 |
| 1442150_at   |               |                                                                                                           | <b>-1,9</b> | 0,000058 |
| 1450757_at   | Cdh11         | <b>cadherin 11</b>                                                                                        | <b>-1,9</b> | 0,001662 |
| 1448617_at   | Cd53          | <b>CD53 antigen</b>                                                                                       | <b>-1,9</b> | 0,013069 |
| 1437500_at   | Noc3l         | <b>nucleolar complex associated 3 homolog (S. cerevisiae)</b>                                             | <b>-1,9</b> | 0,000027 |
| 1454254_s_at | 1600029D21Rik | <b>RIKEN cDNA 1600029D21 gene</b>                                                                         | <b>-1,9</b> | 0,003318 |
| 1437188_at   | Gabbr1        | <b>gamma-aminobutyric acid (GABA-B) receptor, 1</b>                                                       | <b>-1,9</b> | 0,000008 |

|              |               |                                                                                                           |             |          |
|--------------|---------------|-----------------------------------------------------------------------------------------------------------|-------------|----------|
| 1445201_at   | Zfp53         | <b>zinc finger protein 53</b>                                                                             | <b>-1,9</b> | 0,000905 |
| 1420984_at   | Pctp          | <b>phosphatidylcholine transfer protein</b>                                                               | <b>-1,9</b> | 0,000029 |
| 1426501_a_at | Tifa          | <b>TRAF-interacting protein with forkhead-associated domain</b>                                           | <b>-1,9</b> | 0,000568 |
| 1460205_at   | Dcakd         | <b>dephospho-CoA kinase domain containing</b>                                                             | <b>-1,9</b> | 0,000010 |
| 1418202_a_at | Wiz           | <b>widely-interspaced zinc finger motifs</b>                                                              | <b>-1,9</b> | 0,000001 |
| 1450986_at   | Nop58         | <b>NOP58 ribonucleoprotein homolog (yeast)</b>                                                            | <b>-1,9</b> | 0,008738 |
| 1456170_x_at | Calr          | <b>calreticulin</b>                                                                                       | <b>-1,9</b> | 0,000000 |
| 1438058_s_at | Ptov1         | <b>prostate tumor over expressed gene 1</b>                                                               | <b>-1,9</b> | 0,000000 |
| 1426458_at   | Slmap         | <b>sarcolemma associated protein</b>                                                                      | <b>-1,9</b> | 0,000007 |
| 1441684_at   | Ttc3          | <b>tetratricopeptide repeat domain 3</b>                                                                  | <b>-1,9</b> | 0,003045 |
| 1420834_at   | Vamp2         | <b>vesicle-associated membrane protein 2</b>                                                              | <b>-1,9</b> | 0,000003 |
| 1422321_a_at | Sf1           | <b>splicing factor 1</b>                                                                                  | <b>-1,9</b> | 0,000001 |
| 1427099_at   | Maz           | <b>MYC-associated zinc finger protein (purine-binding transcription factor)</b>                           | <b>-1,9</b> | 0,000001 |
| 1458233_at   | Fryl          | <b>furry homolog-like (Drosophila)</b>                                                                    | <b>-1,9</b> | 0,001041 |
| 1420924_at   | Timp2         | <b>tissue inhibitor of metalloproteinase 2</b>                                                            | <b>-1,9</b> | 0,000909 |
| 1422440_at   | Cdk4          | <b>cyclin-dependent kinase 4</b>                                                                          | <b>-1,9</b> | 0,008642 |
| 1455831_at   | Fus           | <b>fusion, derived from t(12;16) malignant liposarcoma (human)</b>                                        | <b>-1,9</b> | 0,000554 |
| 1456715_at   |               |                                                                                                           | <b>-1,9</b> | 0,003593 |
| 1422850_at   | Pabpn1        | <b>poly(A) binding protein, nuclear 1</b>                                                                 | <b>-1,9</b> | 0,001545 |
| 1430356_at   | 2210402A03Rik | <b>RIKEN cDNA 2210402A03 gene</b>                                                                         | <b>-1,9</b> | 0,000007 |
| 1439545_at   |               |                                                                                                           | <b>-1,9</b> | 0,000020 |
| 1420824_at   | Sema4d        | <b>sema domain, immunoglobulin domain (Ig), transmembrane domain (TM) and short cytoplasmic domain, (</b> | <b>-1,9</b> | 0,000011 |
| 1419276_at   | Enpp1         | <b>ectonucleotide pyrophosphatase/phosphodiesterase 1</b>                                                 | <b>-1,9</b> | 0,000011 |
| 1426963_at   | Pacs2         | <b>phosphofurin acidic cluster sorting protein 2</b>                                                      | <b>-1,9</b> | 0,000653 |
| 1444716_at   | Mettl2        | <b>methyltransferase like 2</b>                                                                           | <b>-1,9</b> | 0,000724 |
| 1455778_at   | Zfp192        | <b>zinc finger protein 192</b>                                                                            | <b>-1,9</b> | 0,001502 |
| 1420479_a_at | Nap1l1        | <b>nucleosome assembly protein 1-like 1</b>                                                               | <b>-1,9</b> | 0,009219 |
| 1459442_at   |               |                                                                                                           | <b>-1,9</b> | 0,000001 |
| 1459091_at   |               |                                                                                                           | <b>-1,9</b> | 0,000955 |
| 1435744_at   | 6720401G13Rik | <b>RIKEN cDNA 6720401G13 gene</b>                                                                         | <b>-1,9</b> | 0,003917 |
| 1453311_at   | 2310008B10Rik | <b>RIKEN cDNA 2310008B10 gene</b>                                                                         | <b>-1,9</b> | 0,000679 |
| 1420619_a_at | Aes           | <b>amino-terminal enhancer of split</b>                                                                   | <b>-1,9</b> | 0,000000 |
| 1456526_at   | C130034I24Rik | <b>RIKEN cDNA C130034I24 gene</b>                                                                         | <b>-1,9</b> | 0,000126 |
| 1415983_at   | Lcp1          | <b>lymphocyte cytosolic protein 1</b>                                                                     | <b>-1,9</b> | 0,000005 |
| 1435520_at   | Msi2          | <b>Musashi homolog 2 (Drosophila)</b>                                                                     | <b>-1,9</b> | 0,000005 |
| 1451229_at   | Hdac11        | <b>histone deacetylase 11</b>                                                                             | <b>-1,9</b> | 0,000021 |
| 1448127_at   | Rrm1          | <b>ribonucleotide reductase M1</b>                                                                        | <b>-1,9</b> | 0,010715 |
| 1437000_at   | Dgkq          | <b>diacylglycerol kinase, theta</b>                                                                       | <b>-1,9</b> | 0,000009 |
| 1417015_at   | Rassf3        | <b>Ras association (RalGDS/AF-6) domain family member 3</b>                                               | <b>-1,9</b> | 0,000015 |
| 1437078_at   | Vps52         | <b>vacuolar protein sorting 52 (yeast)</b>                                                                | <b>-1,9</b> | 0,000108 |
| 1454142_a_at | Pwp1          | <b>PWP1 homolog (S. cerevisiae)</b>                                                                       | <b>-1,9</b> | 0,000047 |

|              |               |                                                                        |             |          |
|--------------|---------------|------------------------------------------------------------------------|-------------|----------|
| 1429246_a_at | Anxa6         | <b>annexin A6</b>                                                      | <b>-1,9</b> | 0,012762 |
| 1449401_at   | C1qc          | <b>complement component 1, q subcomponent, C chain</b>                 | <b>-1,9</b> | 0,008703 |
| 1426538_a_at | Trp53         | <b>transformation related protein 53</b>                               | <b>-1,9</b> | 0,000001 |
| 1440381_at   | 2410085M17Rik | <b>RIKEN cDNA 2410085M17 gene</b>                                      | <b>-1,9</b> | 0,000408 |
| 1421355_at   | Tgm3          | <b>transglutaminase 3, E polypeptide</b>                               | <b>-1,9</b> | 0,000069 |
| 1423162_s_at | Spred1        | <b>sprouty protein with EVH-1 domain 1, related sequence</b>           | <b>-2,0</b> | 0,000001 |
| 1453414_at   | Ypel2         | <b>yippee-like 2 (Drosophila)</b>                                      | <b>-2,0</b> | 0,000281 |
| 1453988_a_at | Ide           | <b>insulin degrading enzyme</b>                                        | <b>-2,0</b> | 0,000005 |
| 1446598_at   |               |                                                                        | <b>-2,0</b> | 0,000166 |
| 1442761_at   |               |                                                                        | <b>-2,0</b> | 0,000273 |
| 1424794_at   | Rnf186        | <b>ring finger protein 186</b>                                         | <b>-2,0</b> | 0,000291 |
| 1421070_at   | D3ErtD300e    | <b>DNA segment, Chr 3, ERATO Doi 300, expressed</b>                    | <b>-2,0</b> | 0,000299 |
| 1431362_a_at | Smoc2         | <b>SPARC related modular calcium binding 2</b>                         | <b>-2,0</b> | 0,008301 |
| 1449120_a_at | Pcm1          | <b>pericentriolar material 1</b>                                       | <b>-2,0</b> | 0,000002 |
| 1430177_at   | Ube2b         | <b>ubiquitin-conjugating enzyme E2B, RAD6 homology (S. cerevisiae)</b> | <b>-2,0</b> | 0,000571 |
| 1454268_a_at | Cyba          | <b>cytochrome b-245, alpha polypeptide</b>                             | <b>-2,0</b> | 0,000417 |
| 1445387_at   | Senp6         | <b>SUMO/sentrin specific peptidase 6</b>                               | <b>-2,0</b> | 0,000036 |
| 1424281_at   | Ubp2          | <b>ubiquitin-associated protein 2</b>                                  | <b>-2,0</b> | 0,000000 |
| 1457793_a_at | Whsc111       | <b>Wolf-Hirschhorn syndrome candidate 1-like 1 (human)</b>             | <b>-2,0</b> | 0,000001 |
| 1449029_at   | Mknk2         | <b>MAP kinase-interacting serine/threonine kinase 2</b>                | <b>-2,0</b> | 0,000000 |
| 1451034_at   | Zfp36l2       | <b>zinc finger protein 36, C3H type-like 2</b>                         | <b>-2,0</b> | 0,000004 |
| 1447402_at   |               |                                                                        | <b>-2,0</b> | 0,000011 |
| 1442484_at   | D9ErtD306e    | <b>DNA segment, Chr 9, ERATO Doi 306, expressed</b>                    | <b>-2,0</b> | 0,000468 |
| 1450914_at   | Ppp1r14b      | <b>protein phosphatase 1, regulatory (inhibitor) subunit 14B</b>       | <b>-2,0</b> | 0,001316 |
| 1441956_s_at | Cux1          | <b>cut-like homeobox 1</b>                                             | <b>-2,0</b> | 0,000677 |
| 1453074_at   | Dusp23        | <b>dual specificity phosphatase 23</b>                                 | <b>-2,0</b> | 0,000259 |
| 1436902_x_at | Tmsb10        | <b>thymosin, beta 10</b>                                               | <b>-2,0</b> | 0,000001 |
| 1456904_at   |               |                                                                        | <b>-2,0</b> | 0,000145 |
| 1428869_at   | Nolc1         | <b>nucleolar and coiled-body phosphoprotein 1</b>                      | <b>-2,0</b> | 0,000527 |
| 1443534_at   |               |                                                                        | <b>-2,0</b> | 0,000078 |
| 1434804_at   | Exoc6b        | <b>exocyst complex component 6B</b>                                    | <b>-2,0</b> | 0,000004 |
| 1456223_at   |               |                                                                        | <b>-2,0</b> | 0,000095 |
| 1429477_at   | Ncaph2        | <b>non-SMC condensin II complex, subunit H2</b>                        | <b>-2,0</b> | 0,000704 |
| 1452226_at   | Rcc2          | <b>regulator of chromosome condensation 2</b>                          | <b>-2,0</b> | 0,004644 |
| 1423757_x_at | Igfbp4        | <b>insulin-like growth factor binding protein 4</b>                    | <b>-2,0</b> | 0,013663 |
| 1416572_at   | Mmp14         | <b>matrix metalloproteinase 14 (membrane-inserted)</b>                 | <b>-2,0</b> | 0,000266 |
| 1434166_at   | 9330151L19Rik | <b>RIKEN cDNA 9330151L19 gene</b>                                      | <b>-2,0</b> | 0,000520 |
| 1416362_a_at | Fkbp4         | <b>FK506 binding protein 4</b>                                         | <b>-2,0</b> | 0,000051 |
| 1457848_at   |               |                                                                        | <b>-2,0</b> | 0,000002 |
| 1423746_at   | Txndc5        | <b>thioredoxin domain containing 5</b>                                 | <b>-2,0</b> | 0,000001 |
| 1457944_at   |               |                                                                        | <b>-2,0</b> | 0,000534 |

|              |               |                                                                                          |             |          |
|--------------|---------------|------------------------------------------------------------------------------------------|-------------|----------|
| 1449005_at   | Slc16a3       | <b>solute carrier family 16 (monocarboxylic acid transporters), member 3</b>             | <b>-2,0</b> | 0,000306 |
| 1416998_at   | Rrs1          | <b>RRS1 ribosome biogenesis regulator homolog (S. cerevisiae)</b>                        | <b>-2,0</b> | 0,000101 |
| 1446621_at   |               |                                                                                          | <b>-2,0</b> | 0,000093 |
| 1448748_at   | Plek          | <b>pleckstrin</b>                                                                        | <b>-2,0</b> | 0,012564 |
| 1424259_at   | Lmf1          | <b>lipase maturation factor 1</b>                                                        | <b>-2,0</b> | 0,000011 |
| 1436427_at   | Prpf4b        | <b>PRP4 pre-mRNA processing factor 4 homolog B (yeast)</b>                               | <b>-2,0</b> | 0,002367 |
| 1415977_at   | Isyna1        | <b>myo-inositol 1-phosphate synthase A1</b>                                              | <b>-2,0</b> | 0,000027 |
| 1416365_at   | Hsp90ab1      | <b>heat shock protein 90 alpha (cytosolic), class B member 1</b>                         | <b>-2,0</b> | 0,000015 |
| 1417175_at   | Csnk1e        | <b>casein kinase 1, epsilon</b>                                                          | <b>-2,0</b> | 0,000770 |
| 1439537_at   |               |                                                                                          | <b>-2,0</b> | 0,000090 |
| 1429332_at   | 4632427E13Rik | <b>RIKEN cDNA 4632427E13 gene</b>                                                        | <b>-2,0</b> | 0,000006 |
| 1459433_at   | C130051F05Rik | <b>RIKEN cDNA C130051F05 gene</b>                                                        | <b>-2,0</b> | 0,000139 |
| 1450377_at   | Thbs1         | <b>thrombospondin 1</b>                                                                  | <b>-2,0</b> | 0,000056 |
| 1424938_at   | Steap1        | <b>six transmembrane epithelial antigen of the prostate 1</b>                            | <b>-2,0</b> | 0,004091 |
| 1435981_at   | Nav2          | <b>neuron navigator 2</b>                                                                | <b>-2,0</b> | 0,000167 |
| 1430418_at   | Tmem57        | <b>transmembrane protein 57</b>                                                          | <b>-2,0</b> | 0,000288 |
| 1458972_at   | 9330112F22Rik | <b>RIKEN cDNA 9330112F22 gene</b>                                                        | <b>-2,0</b> | 0,000036 |
| 1421267_a_at | Cited2        | <b>Cbp/p300-interacting transactivator, with Glu/Asp-rich carboxy-terminal domain, 2</b> | <b>-2,0</b> | 0,000001 |
| 1439619_at   | Tcf12         | <b>transcription factor 12</b>                                                           | <b>-2,0</b> | 0,002775 |
| 1452139_at   | Slc35c1       | <b>solute carrier family 35, member C1</b>                                               | <b>-2,0</b> | 0,000002 |
| 1446692_at   |               |                                                                                          | <b>-2,0</b> | 0,000013 |
| 1417219_s_at | Tmsb10        | <b>thymosin, beta 10</b>                                                                 | <b>-2,0</b> | 0,000000 |
| 1460116_s_at | Spred1        | <b>sprouty protein with EVH-1 domain 1, related sequence</b>                             | <b>-2,0</b> | 0,000065 |
| 1442418_at   | B930096F20Rik | <b>RIKEN cDNA B930096F20 gene</b>                                                        | <b>-2,0</b> | 0,000141 |
| 1434077_at   | Wdr37         | <b>WD repeat domain 37</b>                                                               | <b>-2,0</b> | 0,000003 |
| 1448842_at   | Cdo1          | <b>cysteine dioxygenase 1, cytosolic</b>                                                 | <b>-2,0</b> | 0,012853 |
| 1460210_at   | Pkd1          | <b>polycystic kidney disease 1 homolog</b>                                               | <b>-2,0</b> | 0,000000 |
| 1435162_at   | Prkg2         | <b>protein kinase, cGMP-dependent, type II</b>                                           | <b>-2,0</b> | 0,010413 |
| 1454247_a_at | Gpa33         | <b>glycoprotein A33 (transmembrane)</b>                                                  | <b>-2,0</b> | 0,000001 |
| 1446508_at   |               |                                                                                          | <b>-2,0</b> | 0,000001 |
| 1419257_at   | Tcea1         | <b>transcription elongation factor A (SII) 1</b>                                         | <b>-2,0</b> | 0,000074 |
| 1443332_at   |               |                                                                                          | <b>-2,0</b> | 0,004935 |
| 1460565_at   | Slc41a1       | <b>solute carrier family 41, member 1</b>                                                | <b>-2,0</b> | 0,000295 |
| 1440294_at   |               |                                                                                          | <b>-2,0</b> | 0,000071 |
| 1434784_s_at | Tmem106c      | <b>transmembrane protein 106C</b>                                                        | <b>-2,0</b> | 0,000001 |
| 1451199_at   | Qtrtd1        | <b>queuine tRNA-ribosyltransferase domain containing 1</b>                               | <b>-2,0</b> | 0,002877 |
| 1419522_at   | Zmynd19       | <b>zinc finger, MYND domain containing 19</b>                                            | <b>-2,0</b> | 0,000040 |
| 1429870_at   | Tnik          | <b>TRAF2 and NCK interacting kinase</b>                                                  | <b>-2,0</b> | 0,006291 |
| 1436919_at   | Trp53i11      | <b>transformation related protein 53 inducible protein 11</b>                            | <b>-2,0</b> | 0,000011 |
| 1422972_s_at | Kat2a         | <b>K(lysine) acetyltransferase 2A</b>                                                    | <b>-2,0</b> | 0,000001 |
| 1442056_at   |               |                                                                                          | <b>-2,0</b> | 0,001717 |

|              |         |                                                                      |      |          |
|--------------|---------|----------------------------------------------------------------------|------|----------|
| 1417658_at   | Tbrg4   | <b>transforming growth factor beta regulated gene 4</b>              | -2,0 | 0,000001 |
| 1420653_at   | Tgfb1   | <b>transforming growth factor, beta 1</b>                            | -2,0 | 0,000026 |
| 1440615_at   | Dusp16  | <b>dual specificity phosphatase 16</b>                               | -2,0 | 0,000020 |
| 1431096_at   | Ints8   | <b>integrator complex subunit 8</b>                                  | -2,0 | 0,000175 |
| 1454090_at   | Pdss1   | <b>prenyl (solanesyl) diphosphate synthase, subunit 1</b>            | -2,0 | 0,000000 |
| 1420833_at   | Vamp2   | <b>vesicle-associated membrane protein 2</b>                         | -2,0 | 0,000016 |
| 1419168_at   | Mapk6   | <b>mitogen-activated protein kinase 6</b>                            | -2,0 | 0,000000 |
| 1444042_at   | Trip11  | <b>thyroid hormone receptor interactor 11</b>                        | -2,0 | 0,000003 |
| 1423325_at   | Pnn     | <b>pinin</b>                                                         | -2,0 | 0,000193 |
| 1449080_at   | Hdac2   | <b>histone deacetylase 2</b>                                         | -2,0 | 0,002875 |
| 1457188_at   |         |                                                                      | -2,0 | 0,000012 |
| 1417814_at   | Pla2g5  | <b>phospholipase A2, group V</b>                                     | -2,0 | 0,000185 |
| 1428557_a_at | Ormdl1  | <b>ORM1-like 1 (S. cerevisiae)</b>                                   | -2,0 | 0,000437 |
| 1452427_s_at | Ptplad1 | <b>protein tyrosine phosphatase-like A domain containing 1</b>       | -2,0 | 0,000129 |
| 1438686_at   | Eif4g1  | <b>eukaryotic translation initiation factor 4, gamma 1</b>           | -2,0 | 0,000001 |
| 1431061_s_at | Peli1   | <b>pellino 1</b>                                                     | -2,0 | 0,000000 |
| 1458065_at   |         |                                                                      | -2,0 | 0,000239 |
| 1455548_at   | Dlgap4  | <b>discs, large homolog-associated protein 4 (Drosophila)</b>        | -2,0 | 0,000000 |
| 1421224_a_at | Hnf1b   | <b>HNF1 homeobox B</b>                                               | -2,0 | 0,000000 |
| 1450747_at   | Keap1   | <b>kelch-like ECH-associated protein 1</b>                           | -2,0 | 0,000032 |
| 1436871_at   | Sfrs7   | <b>splicing factor, arginine/serine-rich 7</b>                       | -2,0 | 0,003940 |
| 1429088_at   | Lbh     | <b>limb-bud and heart</b>                                            | -2,0 | 0,000001 |
| 1460218_at   | Cd52    | <b>CD52 antigen</b>                                                  | -2,0 | 0,003816 |
| 1424198_at   | Dlg5    | <b>discs, large homolog 5 (Drosophila)</b>                           | -2,0 | 0,000010 |
| 1448590_at   | Col6a1  | <b>collagen, type VI, alpha 1</b>                                    | -2,0 | 0,001071 |
| 1439123_at   |         |                                                                      | -2,0 | 0,000202 |
| 1433586_at   | Rgmb    | <b>RGM domain family, member B</b>                                   | -2,0 | 0,000005 |
| 1436318_at   | Tardbp  | <b>TAR DNA binding protein</b>                                       | -2,0 | 0,000556 |
| 1443846_x_at |         |                                                                      | -2,0 | 0,000015 |
| 1436232_a_at | Gabpb1  | <b>GA repeat binding protein, beta 1</b>                             | -2,0 | 0,000000 |
| 1444445_at   | C77648  | <b>expressed sequence C77648</b>                                     | -2,0 | 0,000086 |
| 1421811_at   | Thbs1   | <b>thrombospondin 1</b>                                              | -2,0 | 0,006431 |
| 1445827_at   | Prkcbp1 | <b>protein kinase C binding protein 1</b>                            | -2,0 | 0,000206 |
| 1445178_at   | Sh3rf1  | <b>SH3 domain containing ring finger 1</b>                           | -2,0 | 0,002888 |
| 1456063_at   | Fam120c | <b>family with sequence similarity 120, member C</b>                 | -2,0 | 0,000102 |
| 1423087_a_at | Tomm6   | <b>translocase of outer mitochondrial membrane 6 homolog (yeast)</b> | -2,0 | 0,000000 |
| 1451331_at   | Ppp1r1b | <b>protein phosphatase 1, regulatory (inhibitor) subunit 1B</b>      | -2,0 | 0,000001 |
| 1417253_at   | Frg1    | <b>FSHD region gene 1</b>                                            | -2,0 | 0,000000 |
| 1448603_at   | Srpk2   | <b>serine/arginine-rich protein specific kinase 2</b>                | -2,0 | 0,000001 |
| 1424668_a_at | Cux1    | <b>cut-like homeobox 1</b>                                           | -2,0 | 0,000000 |
| 1423121_at   | Ide     | <b>insulin degrading enzyme</b>                                      | -2,0 | 0,000001 |



|              |               |                                                                                |  |      |          |
|--------------|---------------|--------------------------------------------------------------------------------|--|------|----------|
| 1443355_at   |               |                                                                                |  | -2,0 | 0,000636 |
| 1422249_s_at | Zfa           | <b>zinc finger protein, autosomal</b>                                          |  | -2,0 | 0,000612 |
| 1428142_at   | Etv5          | <b>ets variant gene 5</b>                                                      |  | -2,0 | 0,010199 |
| 1423004_at   | Vipr1         | <b>vasoactive intestinal peptide receptor 1</b>                                |  | -2,0 | 0,000153 |
| 1440040_at   |               |                                                                                |  | -2,0 | 0,003431 |
| 1441359_at   | Zcchc11       | <b>zinc finger, CCHC domain containing 11</b>                                  |  | -2,0 | 0,000012 |
| 1441505_at   |               |                                                                                |  | -2,1 | 0,000049 |
| 1427408_a_at | Thrap3        | <b>thyroid hormone receptor associated protein 3</b>                           |  | -2,1 | 0,000000 |
| 1441125_at   | Setd5         | <b>SET domain containing 5</b>                                                 |  | -2,1 | 0,000039 |
| 1436321_at   | B3gnt7        | <b>UDP-GlcNAc:betaGal beta-1,3-N-acetylglucosaminyltransferase 7</b>           |  | -2,1 | 0,000292 |
| 1434644_at   | Tbl1x         | <b>transducin (beta)-like 1 X-linked</b>                                       |  | -2,1 | 0,000006 |
| 1457262_at   | Smg1          | <b>SMG1 homolog, phosphatidylinositol 3-kinase-related kinase (C. elegans)</b> |  | -2,1 | 0,000000 |
| 1417232_at   | Cldn2         | <b>claudin 2</b>                                                               |  | -2,1 | 0,000321 |
| 1444333_at   |               |                                                                                |  | -2,1 | 0,000100 |
| 1420699_at   | Clec7a        | <b>C-type lectin domain family 7, member a</b>                                 |  | -2,1 | 0,002664 |
| 1457812_at   | Trp53bp1      | <b>transformation related protein 53 binding protein 1</b>                     |  | -2,1 | 0,005441 |
| 1453234_at   | 1300002K09Rik | <b>RIKEN cDNA 1300002K09 gene</b>                                              |  | -2,1 | 0,000033 |
| 1441475_at   |               |                                                                                |  | -2,1 | 0,000131 |
| 1451884_a_at | Lsm2          | <b>LSM2 homolog, U6 small nuclear RNA associated (S. cerevisiae)</b>           |  | -2,1 | 0,000000 |
| 1422528_a_at | Zfp3611       | <b>zinc finger protein 36, C3H type-like 1</b>                                 |  | -2,1 | 0,000000 |
| 1445341_at   |               |                                                                                |  | -2,1 | 0,000227 |
| 1423357_at   | 2610209A20Rik | <b>RIKEN cDNA 2610209A20 gene</b>                                              |  | -2,1 | 0,001263 |
| 1441272_at   | Matr3         | <b>matrin 3</b>                                                                |  | -2,1 | 0,000029 |
| 1428069_at   | Cdca7         | <b>cell division cycle associated 7</b>                                        |  | -2,1 | 0,002715 |
| 1446182_at   |               |                                                                                |  | -2,1 | 0,000103 |
| 1449845_a_at | Ephb4         | <b>Eph receptor B4</b>                                                         |  | -2,1 | 0,000000 |
| 1456955_at   |               |                                                                                |  | -2,1 | 0,000029 |
| 1431235_at   | Matr3         | <b>matrin 3</b>                                                                |  | -2,1 | 0,000000 |
| 1427048_at   | Smo           | <b>smoothened homolog (Drosophila)</b>                                         |  | -2,1 | 0,000069 |
| 1440372_at   |               |                                                                                |  | -2,1 | 0,000021 |
| 1438700_at   | Fnbp4         | <b>formin binding protein 4</b>                                                |  | -2,1 | 0,000193 |
| 1415871_at   | Tgfb1         | <b>transforming growth factor, beta induced</b>                                |  | -2,1 | 0,000038 |
| 1420762_a_at | Ybx2          | <b>Y box protein 2</b>                                                         |  | -2,1 | 0,000000 |
| 1422705_at   | Pmepa1        | <b>prostate transmembrane protein, androgen induced 1</b>                      |  | -2,1 | 0,006721 |
| 1424081_at   | Pcgf6         | <b>polycomb group ring finger 6</b>                                            |  | -2,1 | 0,000316 |
| 1442224_at   |               |                                                                                |  | -2,1 | 0,000022 |
| 1446143_at   |               |                                                                                |  | -2,1 | 0,000002 |
| 1436515_at   | Bach2         | <b>BTB and CNC homology 2</b>                                                  |  | -2,1 | 0,000072 |
| 1440123_at   |               |                                                                                |  | -2,1 | 0,000007 |
| 1418824_at   | Arf6          | <b>ADP-ribosylation factor 6</b>                                               |  | -2,1 | 0,000007 |
| 1422854_at   | Shc1          | <b>src homology 2 domain-containing transforming protein C1</b>                |  | -2,1 | 0,000003 |

|              |               |                                                                                           |      |          |
|--------------|---------------|-------------------------------------------------------------------------------------------|------|----------|
| 1421118_a_at | Gpr56         | <b>G protein-coupled receptor 56</b>                                                      | -2,1 | 0,000000 |
| 1434554_at   | Trim37        | <b>tripartite motif-containing 37</b>                                                     | -2,1 | 0,001400 |
| 1437798_at   | 6720422M22Rik | <b>RIKEN cDNA 6720422M22 gene</b>                                                         | -2,1 | 0,003899 |
| 1452899_at   | Rian          | <b>RNA imprinted and accumulated in nucleus</b>                                           | -2,1 | 0,000419 |
| 1443444_at   |               |                                                                                           | -2,1 | 0,000012 |
| 1440254_at   | 100041277     | <b>predicted gene, 100041277</b>                                                          | -2,1 | 0,001202 |
| 1449551_at   | Myo1c         | <b>myosin IC</b>                                                                          | -2,1 | 0,000000 |
| 1431830_at   | Zfp329        | <b>zinc finger protein 329</b>                                                            | -2,1 | 0,000160 |
| 1456547_at   |               |                                                                                           | -2,1 | 0,000049 |
| 1420946_at   | Atrx          | <b>alpha thalassemia/mental retardation syndrome X-linked homolog (human)</b>             | -2,1 | 0,000899 |
| 1438069_a_at | Rbm5          | <b>RNA binding motif protein 5</b>                                                        | -2,1 | 0,000356 |
| 1433485_x_at | Gpr56         | <b>G protein-coupled receptor 56</b>                                                      | -2,1 | 0,000000 |
| 1418835_at   | Phlda1        | <b>pleckstrin homology-like domain, family A, member 1</b>                                | -2,1 | 0,008178 |
| 1450089_a_at | Srprb         | <b>signal recognition particle receptor, B subunit</b>                                    | -2,1 | 0,000000 |
| 1430837_a_at | Mbd1          | <b>methyl-CpG binding domain protein 1</b>                                                | -2,1 | 0,000000 |
| 1425711_a_at | Akt1          | <b>thymoma viral proto-oncogene 1</b>                                                     | -2,1 | 0,000000 |
| 1417632_at   | Atp6v0a1      | <b>ATPase, H+ transporting, lysosomal V0 subunit A1</b>                                   | -2,1 | 0,000001 |
| 1444890_at   |               |                                                                                           | -2,1 | 0,000464 |
| 1427739_a_at | Trp53         | <b>transformation related protein 53</b>                                                  | -2,1 | 0,000001 |
| 1418830_at   | Cd79a         | <b>CD79A antigen (immunoglobulin-associated alpha)</b>                                    | -2,1 | 0,004599 |
| 1452811_at   | Atic          | <b>5-aminoimidazole-4-carboxamide ribonucleotide formyltransferase/IMP cyclohydrolase</b> | -2,1 | 0,000000 |
| 1431175_at   | 1810019D21Rik | <b>RIKEN cDNA 1810019D21 gene</b>                                                         | -2,1 | 0,000467 |
| 1436736_x_at | D0H4S114      | <b>DNA segment, human D4S114</b>                                                          | -2,1 | 0,007208 |
| 1428319_at   | Pdlim7        | <b>PDZ and LIM domain 7</b>                                                               | -2,1 | 0,002488 |
| 1420975_at   | Baz1b         | <b>bromodomain adjacent to zinc finger domain, 1B</b>                                     | -2,1 | 0,000001 |
| 1443158_at   |               |                                                                                           | -2,1 | 0,000017 |
| 1425276_at   | Fbrs          | <b>fibrosin</b>                                                                           | -2,1 | 0,000000 |
| 1442336_at   |               |                                                                                           | -2,2 | 0,000000 |
| 1442316_x_at | Trp53bp1      | <b>transformation related protein 53 binding protein 1</b>                                | -2,2 | 0,000155 |
| 1420893_a_at | Tgfbr1        | <b>transforming growth factor, beta receptor I</b>                                        | -2,2 | 0,000027 |
| 1460279_a_at | Gtf2i         | <b>general transcription factor II I</b>                                                  | -2,2 | 0,000027 |
| 1428513_at   | Calcoo1       | <b>calcium binding and coiled coil domain 1</b>                                           | -2,2 | 0,000000 |
| 1435477_s_at | Fcgr2b        | <b>Fc receptor, IgG, low affinity IIb</b>                                                 | -2,2 | 0,004341 |
| 1446618_at   | LOC432971     | <b>hypothetical gene supported by AK038224</b>                                            | -2,2 | 0,000009 |
| 1437431_at   | Cux1          | <b>cut-like homeobox 1</b>                                                                | -2,2 | 0,000057 |
| 1439948_at   | BC046401      | <b>cDNA sequence BC046401</b>                                                             | -2,2 | 0,000626 |
| 1443509_at   |               |                                                                                           | -2,2 | 0,000058 |
| 1450743_s_at | Syncrip       | <b>synaptotagmin binding, cytoplasmic RNA interacting protein</b>                         | -2,2 | 0,000197 |
| 1434852_at   | Pla2g2f       | <b>phospholipase A2, group IIF</b>                                                        | -2,2 | 0,000005 |
| 1442700_at   | Pde4b         | <b>phosphodiesterase 4B, cAMP specific</b>                                                | -2,2 | 0,001242 |
| 1456849_at   |               |                                                                                           | -2,2 | 0,000025 |

|              |               |                                                                          |      |          |
|--------------|---------------|--------------------------------------------------------------------------|------|----------|
| 1438245_at   | Nfib          | nuclear factor I/B                                                       | -2,2 | 0,000039 |
| 1420747_at   | Ppnr          | per-pentamer repeat gene                                                 | -2,2 | 0,000198 |
| 1428909_at   | A130040M12Rik | RIKEN cDNA A130040M12 gene                                               | -2,2 | 0,000066 |
| 1439950_at   | Dync1h1       | dynein cytoplasmic 1 heavy chain 1                                       | -2,2 | 0,000006 |
| 1438402_at   | Fam171a1      | family with sequence similarity 171, member A1                           | -2,2 | 0,000010 |
| 1427037_at   | Eif4g1        | eukaryotic translation initiation factor 4, gamma 1                      | -2,2 | 0,000000 |
| 1415922_s_at | Marcks1       | MARCKS-like 1                                                            | -2,2 | 0,008574 |
| 1455878_at   | 2700023E23Rik | RIKEN cDNA 2700023E23 gene                                               | -2,2 | 0,004043 |
| 1448692_at   | Ubqln4        | ubiquilin 4                                                              | -2,2 | 0,000000 |
| 1448916_at   | Mafg          | v-maf musculoaponeurotic fibrosarcoma oncogene family, protein G (avian) | -2,2 | 0,000145 |
| 1439136_at   |               |                                                                          | -2,2 | 0,000090 |
| 1456632_at   | Bcl11a        | B-cell CLL/lymphoma 11A (zinc finger protein)                            | -2,2 | 0,006576 |
| 1415824_at   | Scd2          | stearoyl-Coenzyme A desaturase 2                                         | -2,2 | 0,000024 |
| 1445866_at   | Mast4         | microtubule associated serine/threonine kinase family member 4           | -2,2 | 0,000004 |
| 1417326_a_at | Anapc11       | anaphase promoting complex subunit 11                                    | -2,2 | 0,000000 |
| 1426596_a_at | Smn1          | survival motor neuron 1                                                  | -2,2 | 0,000000 |
| 1431206_at   | 5730601F06Rik | RIKEN cDNA 5730601F06 gene                                               | -2,2 | 0,000424 |
| 1421354_at   | Prkg2         | protein kinase, cGMP-dependent, type II                                  | -2,2 | 0,007489 |
| 1436967_at   | Ankrd11       | ankyrin repeat domain 11                                                 | -2,2 | 0,000029 |
| 1452021_a_at | Hes6          | hairy and enhancer of split 6 (Drosophila)                               | -2,2 | 0,003228 |
| 1450379_at   | Msn           | moesin                                                                   | -2,2 | 0,000014 |
| 1425359_at   | Mall          | mal, T-cell differentiation protein-like                                 | -2,2 | 0,001021 |
| 1433587_at   | Rgmb          | RGM domain family, member B                                              | -2,2 | 0,000030 |
| 1441373_at   |               |                                                                          | -2,2 | 0,000512 |
| 1460672_at   | 2410002F23Rik | RIKEN cDNA 2410002F23 gene                                               | -2,2 | 0,000592 |
| 1435608_at   | Znrf3         | zinc and ring finger 3                                                   | -2,2 | 0,012041 |
| 1459316_at   |               |                                                                          | -2,2 | 0,000035 |
| 1448018_at   |               |                                                                          | -2,2 | 0,001874 |
| 1445200_at   |               |                                                                          | -2,2 | 0,000725 |
| 1453623_a_at | Rad23a        | RAD23a homolog (S. cerevisiae)                                           | -2,2 | 0,000000 |
| 1416106_at   | Kti12         | KTI12 homolog, chromatin associated (S. cerevisiae)                      | -2,2 | 0,000015 |
| 1425698_a_at | Crebzf        | CREB/ATF bZIP transcription factor                                       | -2,2 | 0,000002 |
| 1436869_at   | Shh           | sonic hedgehog                                                           | -2,2 | 0,001881 |
| 1458358_at   | Pank2         | pantothenate kinase 2 (Hallervorden-Spatz syndrome)                      | -2,2 | 0,000007 |
| 1441481_at   | Mfap3l        | microfibrillar-associated protein 3-like                                 | -2,2 | 0,014794 |
| 1434316_at   | Chsy1         | chondroitin sulfate synthase 1                                           | -2,2 | 0,001377 |
| 1447408_at   |               |                                                                          | -2,2 | 0,000136 |
| 1422846_at   | Rbp2          | retinol binding protein 2, cellular                                      | -2,2 | 0,000001 |
| 1442535_at   |               |                                                                          | -2,2 | 0,000091 |
| 1428462_at   | Ppp2r5e       | protein phosphatase 2, regulatory subunit B (B56), epsilon isoform       | -2,3 | 0,000002 |
| 1440841_at   |               |                                                                          | -2,3 | 0,000062 |

|              |               |                                                                               |             |          |
|--------------|---------------|-------------------------------------------------------------------------------|-------------|----------|
| 1438164_x_at | Flot2         | <b>flotillin 2</b>                                                            | <b>-2,3</b> | 0,000035 |
| 1446550_at   | Gspt1         | <b>G1 to S phase transition 1</b>                                             | <b>-2,3</b> | 0,000319 |
| 1444260_at   |               |                                                                               | <b>-2,3</b> | 0,001108 |
| 1451169_at   | Nomo1         | <b>nodal modulator 1</b>                                                      | <b>-2,3</b> | 0,000000 |
| 1440621_at   |               |                                                                               | <b>-2,3</b> | 0,000039 |
| 1438559_x_at | Slc44a2       | <b>solute carrier family 44, member 2</b>                                     | <b>-2,3</b> | 0,000107 |
| 1458018_at   |               |                                                                               | <b>-2,3</b> | 0,000025 |
| 1439477_at   | 5430406J06Rik | <b>RIKEN cDNA 5430406J06 gene</b>                                             | <b>-2,3</b> | 0,000002 |
| 1419480_at   | Sell          | <b>selectin, lymphocyte</b>                                                   | <b>-2,3</b> | 0,000182 |
| 1442992_at   | 130004C03     | <b>hypothetical LOC403343</b>                                                 | <b>-2,3</b> | 0,000326 |
| 1455060_at   | G3bp1         | <b>Ras-GTPase-activating protein SH3-domain binding protein 1</b>             | <b>-2,3</b> | 0,000008 |
| 1427110_at   | Raver1        | <b>ribonucleoprotein, PTB-binding 1</b>                                       | <b>-2,3</b> | 0,000004 |
| 1427797_s_at |               |                                                                               | <b>-2,3</b> | 0,000005 |
| 1437486_at   | Gprc5a        | <b>G protein-coupled receptor, family C, group 5, member A</b>                | <b>-2,3</b> | 0,000007 |
| 1416200_at   | Il33          | <b>interleukin 33</b>                                                         | <b>-2,3</b> | 0,006724 |
| 1418587_at   | Traf3         | <b>TNF receptor-associated factor 3</b>                                       | <b>-2,3</b> | 0,000000 |
| 1422559_at   | Ube2n         | <b>ubiquitin-conjugating enzyme E2N</b>                                       | <b>-2,3</b> | 0,000000 |
| 1456993_at   | D2Ert640e     | <b>DNA segment, Chr 2, ERATO Doi 640, expressed</b>                           | <b>-2,3</b> | 0,000016 |
| 1460302_at   | Thbs1         | <b>thrombospondin 1</b>                                                       | <b>-2,3</b> | 0,000810 |
| 1429192_at   | Ski           | <b>ski sarcoma viral oncogene homolog (avian)</b>                             | <b>-2,3</b> | 0,000000 |
| 1424667_a_at | Cux1          | <b>cut-like homeobox 1</b>                                                    | <b>-2,3</b> | 0,000000 |
| 1428694_at   | 5033413D16Rik | <b>RIKEN cDNA 5033413D16 gene</b>                                             | <b>-2,3</b> | 0,001549 |
| 1444140_at   |               |                                                                               | <b>-2,3</b> | 0,000180 |
| 1421709_a_at | Fmo5          | <b>flavin containing monooxygenase 5</b>                                      | <b>-2,3</b> | 0,003287 |
| 1421164_a_at | Arhgef1       | <b>Rho guanine nucleotide exchange factor (GEF) 1</b>                         | <b>-2,3</b> | 0,000009 |
| 1440196_at   |               |                                                                               | <b>-2,3</b> | 0,000182 |
| 1442071_at   | Abce1         | <b>ATP-binding cassette, sub-family E (OABP), member 1</b>                    | <b>-2,3</b> | 0,001526 |
| 1417460_at   | Ifitm2        | <b>interferon induced transmembrane protein 2</b>                             | <b>-2,3</b> | 0,000999 |
| 1420948_s_at | Atrx          | <b>alpha thalassemia/mental retardation syndrome X-linked homolog (human)</b> | <b>-2,3</b> | 0,000397 |
| 1450834_at   | Fut4          | <b>fucosyltransferase 4</b>                                                   | <b>-2,3</b> | 0,000000 |
| 1417426_at   | Srgn          | <b>serglycin</b>                                                              | <b>-2,3</b> | 0,006102 |
| 1424117_at   | BC056474      | <b>cDNA sequence BC056474</b>                                                 | <b>-2,3</b> | 0,000000 |
| 1442067_at   |               |                                                                               | <b>-2,3</b> | 0,000176 |
| 1423129_at   | Shoc2         | <b>soc-2 (suppressor of clear) homolog (C. elegans)</b>                       | <b>-2,3</b> | 0,000000 |
| 1421149_a_at | Atn1          | <b>atrophin 1</b>                                                             | <b>-2,3</b> | 0,000000 |
| 1422439_a_at | Cdk4          | <b>cyclin-dependent kinase 4</b>                                              | <b>-2,3</b> | 0,007011 |
| 1442903_at   | 4732423E21Rik | <b>RIKEN cDNA 4732423E21 gene</b>                                             | <b>-2,4</b> | 0,001925 |
| 1440773_at   |               |                                                                               | <b>-2,4</b> | 0,000003 |
| 1427903_at   | Phpt1         | <b>phosphohistidine phosphatase 1</b>                                         | <b>-2,4</b> | 0,000009 |
| 1427008_at   | Rnf43         | <b>ring finger protein 43</b>                                                 | <b>-2,4</b> | 0,009681 |
| 1436222_at   | Gas5          | <b>growth arrest specific 5</b>                                               | <b>-2,4</b> | 0,009639 |

|              |               |                                                                                      |      |          |
|--------------|---------------|--------------------------------------------------------------------------------------|------|----------|
| 1450792_at   | Tyrobp        | <b>TYRO protein tyrosine kinase binding protein</b>                                  | -2,4 | 0,000007 |
| 1417063_at   | C1qb          | <b>complement component 1, q subcomponent, beta polypeptide</b>                      | -2,4 | 0,007557 |
| 1437733_at   | Eif4ebp2      | <b>eukaryotic translation initiation factor 4E binding protein 2</b>                 | -2,4 | 0,000000 |
| 1428777_at   | Spred1        | <b>sprouty protein with EVH-1 domain 1, related sequence</b>                         | -2,4 | 0,000000 |
| 1423566_a_at | Hsph1         | <b>heat shock 105kDa/110kDa protein 1</b>                                            | -2,4 | 0,000379 |
| 1448797_at   | Elk3          | <b>ELK3, member of ETS oncogene family</b>                                           | -2,4 | 0,011654 |
| 1448160_at   | Lcp1          | <b>lymphocyte cytosolic protein 1</b>                                                | -2,4 | 0,000003 |
| 1418591_at   | Dnaja4        | <b>DnaJ (Hsp40) homolog, subfamily A, member 4</b>                                   | -2,4 | 0,000196 |
| 1433756_at   | S100pbp       | <b>S100P binding protein</b>                                                         | -2,4 | 0,000046 |
| 1448766_at   | Gjb1          | <b>gap junction protein, beta 1</b>                                                  | -2,4 | 0,000001 |
| 1423760_at   | Cd44          | <b>CD44 antigen</b>                                                                  | -2,4 | 0,007276 |
| 1441615_at   | Cbfa2t2       | <b>core-binding factor, runt domain, alpha subunit 2, translocated to, 2 (human)</b> | -2,4 | 0,000085 |
| 1458676_at   | Nktr          | <b>natural killer tumor recognition sequence</b>                                     | -2,4 | 0,000001 |
| 1457383_at   |               |                                                                                      | -2,4 | 0,000000 |
| 1449956_at   | Prkce         | <b>protein kinase C, epsilon</b>                                                     | -2,4 | 0,000241 |
| 1420394_s_at | Lilrb4        | <b>leukocyte immunoglobulin-like receptor, subfamily B, member 4</b>                 | -2,4 | 0,009649 |
| 1429169_at   | Rbm3          | <b>RNA binding motif protein 3</b>                                                   | -2,4 | 0,015359 |
| 1417821_at   | D17H6S56E-5   | <b>DNA segment, Chr 17, human D6S56E 5</b>                                           | -2,4 | 0,005630 |
| 1420643_at   | Lfng          | <b>LFNG O-fucosylpeptide 3-beta-N-acetylglucosaminyltransferase</b>                  | -2,4 | 0,000009 |
| 1415935_at   | Smoc2         | <b>SPARC related modular calcium binding 2</b>                                       | -2,4 | 0,008087 |
| 1447147_at   |               |                                                                                      | -2,4 | 0,003647 |
| 1452911_at   | Spred1        | <b>sprouty protein with EVH-1 domain 1, related sequence</b>                         | -2,4 | 0,000002 |
| 1437400_at   | Nedd4l        | <b>neural precursor cell expressed, developmentally down-regulated gene 4-like</b>   | -2,5 | 0,000001 |
| 1452841_at   | Pgm2l1        | <b>phosphoglucomutase 2-like 1</b>                                                   | -2,5 | 0,011822 |
| 1421789_s_at | Arf3          | <b>ADP-ribosylation factor 3</b>                                                     | -2,5 | 0,000033 |
| 1432646_a_at | 2900097C17Rik | <b>RIKEN cDNA 2900097C17 gene</b>                                                    | -2,5 | 0,000022 |
| 1454904_at   | Mtm1          | <b>X-linked myotubular myopathy gene 1</b>                                           | -2,5 | 0,001372 |
| 1422135_at   | Zfp146        | <b>zinc finger protein 146</b>                                                       | -2,5 | 0,000165 |
| 1429555_at   | Cldnd1        | <b>claudin domain containing 1</b>                                                   | -2,5 | 0,000004 |
| 1443095_at   |               |                                                                                      | -2,5 | 0,000059 |
| 1448710_at   | Cxcr4         | <b>chemokine (C-X-C motif) receptor 4</b>                                            | -2,5 | 0,000002 |
| 1424179_at   | Plekhj1       | <b>pleckstrin homology domain containing, family J member 1</b>                      | -2,5 | 0,000000 |
| 1455904_at   | Gas5          | <b>growth arrest specific 5</b>                                                      | -2,5 | 0,008137 |
| 1442675_at   |               |                                                                                      | -2,5 | 0,002387 |
| 1436541_at   | 2310008H09Rik | <b>RIKEN cDNA 2310008H09 gene</b>                                                    | -2,5 | 0,000012 |
| 1418468_at   | Anxa11        | <b>annexin A11</b>                                                                   | -2,5 | 0,000001 |
| 1437052_s_at | Slc2a3        | <b>solute carrier family 2 (facilitated glucose transporter), member 3</b>           | -2,5 | 0,004548 |
| 1417470_at   | Apobec3       | <b>apolipoprotein B mRNA editing enzyme, catalytic polypeptide 3</b>                 | -2,5 | 0,000168 |
| 1443027_at   |               |                                                                                      | -2,5 | 0,000386 |
| 1417228_at   | Capn1         | <b>calpain 1</b>                                                                     | -2,5 | 0,000001 |
| 1459942_at   |               |                                                                                      | -2,5 | 0,000005 |

|              |               |                                                                                                          |             |          |
|--------------|---------------|----------------------------------------------------------------------------------------------------------|-------------|----------|
| 1448482_at   | Slc39a8       | <b>solute carrier family 39 (metal ion transporter), member 8</b>                                        | <b>-2,5</b> | 0,000037 |
| 1448749_at   | Plek          | <b>pleckstrin</b>                                                                                        | <b>-2,5</b> | 0,000826 |
| 1445390_at   | Pawr          | <b>PRKC, apoptosis, WT1, regulator</b>                                                                   | <b>-2,5</b> | 0,000000 |
| 1455246_at   | Smarcc1       | <b>SWI/SNF related, matrix associated, actin dependent regulator of chromatin, subfamily c, member 1</b> | <b>-2,5</b> | 0,000405 |
| 1437627_at   | Mex3d         | <b>mex3 homolog D (C. elegans)</b>                                                                       | <b>-2,5</b> | 0,000235 |
| 1428010_at   | Timm9         | <b>translocase of inner mitochondrial membrane 9 homolog (yeast)</b>                                     | <b>-2,5</b> | 0,000112 |
| 1452235_at   | Man1b1        | <b>mannosidase, alpha, class 1B, member 1</b>                                                            | <b>-2,6</b> | 0,000000 |
| 1435655_at   | Rpl12         | <b>ribosomal protein L12</b>                                                                             | <b>-2,6</b> | 0,000424 |
| 1446130_at   |               |                                                                                                          | <b>-2,6</b> | 0,000266 |
| 1418524_at   | Pcm1          | <b>pericentriolar material 1</b>                                                                         | <b>-2,6</b> | 0,000002 |
| 1435152_at   | Leng8         | <b>leukocyte receptor cluster (LRC) member 8</b>                                                         | <b>-2,6</b> | 0,000004 |
| 1416246_a_at | Coro1a        | <b>coronin, actin binding protein 1A</b>                                                                 | <b>-2,6</b> | 0,000506 |
| 1459443_at   |               |                                                                                                          | <b>-2,6</b> | 0,000430 |
| 1457781_at   | Kcnq1ot1      | <b>KCNQ1 overlapping transcript 1</b>                                                                    | <b>-2,6</b> | 0,000585 |
| 1437325_x_at | Aldh18a1      | <b>aldehyde dehydrogenase 18 family, member A1</b>                                                       | <b>-2,6</b> | 0,000006 |
| 1431385_a_at | Mbtps1        | <b>membrane-bound transcription factor peptidase, site 1</b>                                             | <b>-2,6</b> | 0,000002 |
| 1427747_a_at | Lcn2          | <b>lipocalin 2</b>                                                                                       | <b>-2,6</b> | 0,000740 |
| 1425716_s_at | Bak1          | <b>BCL2-antagonist/killer 1</b>                                                                          | <b>-2,6</b> | 0,000003 |
| 1423754_at   | Ifitm3        | <b>interferon induced transmembrane protein 3</b>                                                        | <b>-2,6</b> | 0,011114 |
| 1441797_at   |               |                                                                                                          | <b>-2,6</b> | 0,000021 |
| 1452483_a_at | Cd44          | <b>CD44 antigen</b>                                                                                      | <b>-2,6</b> | 0,000409 |
| 1448029_at   | Tbx3          | <b>T-box 3</b>                                                                                           | <b>-2,7</b> | 0,002106 |
| 1455195_at   | Rps24         | <b>ribosomal protein S24</b>                                                                             | <b>-2,7</b> | 0,001936 |
| 1434357_a_at | Kpnb1         | <b>karyopherin (importin) beta 1</b>                                                                     | <b>-2,7</b> | 0,000000 |
| 1443837_x_at | Bcl2          | <b>B-cell leukemia/lymphoma 2</b>                                                                        | <b>-2,7</b> | 0,000362 |
| 1455740_at   | Hnrmpa1       | <b>heterogeneous nuclear ribonucleoprotein A1</b>                                                        | <b>-2,7</b> | 0,000306 |
| 1421262_at   | Lipg          | <b>lipase, endothelial</b>                                                                               | <b>-2,7</b> | 0,000006 |
| 1419728_at   | Cxcl5         | <b>chemokine (C-X-C motif) ligand 5</b>                                                                  | <b>-2,7</b> | 0,005692 |
| 1430332_a_at | Gusb          | <b>glucuronidase, beta</b>                                                                               | <b>-2,7</b> | 0,000122 |
| 1460650_at   | Atp6v0a1      | <b>ATPase, H+ transporting, lysosomal V0 subunit A1</b>                                                  | <b>-2,7</b> | 0,000007 |
| 1434376_at   | Cd44          | <b>CD44 antigen</b>                                                                                      | <b>-2,7</b> | 0,005388 |
| 1457084_at   | Nlrp9b        | <b>NLR family, pyrin domain containing 9B</b>                                                            | <b>-2,7</b> | 0,000001 |
| 1419398_a_at | Reep5         | <b>receptor accessory protein 5</b>                                                                      | <b>-2,8</b> | 0,000000 |
| 1418015_at   | Pum2          | <b>pumilio 2 (Drosophila)</b>                                                                            | <b>-2,8</b> | 0,000000 |
| 1452163_at   | Ets1          | <b>E26 avian leukemia oncogene 1, 5' domain</b>                                                          | <b>-2,8</b> | 0,003713 |
| 1443341_at   |               |                                                                                                          | <b>-2,8</b> | 0,000000 |
| 1416568_a_at | Acin1         | <b>apoptotic chromatin condensation inducer 1</b>                                                        | <b>-2,8</b> | 0,000000 |
| 1427979_at   | 4732418C07Rik | <b>RIKEN cDNA 4732418C07 gene</b>                                                                        | <b>-2,8</b> | 0,000000 |
| 1436713_s_at | Meg3          | <b>maternally expressed 3</b>                                                                            | <b>-2,8</b> | 0,000003 |
| 1418570_at   | Ncstn         | <b>nicastrin</b>                                                                                         | <b>-2,8</b> | 0,000000 |
| 1441480_at   | 7120451J01Rik | <b>RIKEN cDNA 7120451J01 gene</b>                                                                        | <b>-2,8</b> | 0,000000 |

|              |           |                                                                                                             |             |          |
|--------------|-----------|-------------------------------------------------------------------------------------------------------------|-------------|----------|
| 1458161_at   | Kcnq1ot1  | <b>KCNQ1 overlapping transcript 1</b>                                                                       | <b>-2,8</b> | 0,000088 |
| 1437405_a_at | Igfbp4    | <b>insulin-like growth factor binding protein 4</b>                                                         | <b>-2,9</b> | 0,008826 |
| 1450903_at   | Rad23b    | <b>RAD23b homolog (S. cerevisiae)</b>                                                                       | <b>-2,9</b> | 0,000000 |
| 1422853_at   | Shc1      | <b>src homology 2 domain-containing transforming protein C1</b>                                             | <b>-2,9</b> | 0,000000 |
| 1426208_x_at | Plagl1    | <b>pleiomorphic adenoma gene-like 1</b>                                                                     | <b>-2,9</b> | 0,010471 |
| 1439068_at   | Erap1     | <b>endoplasmic reticulum aminopeptidase 1</b>                                                               | <b>-2,9</b> | 0,000000 |
| 1439740_s_at | Uck2      | <b>uridine-cytidine kinase 2</b>                                                                            | <b>-2,9</b> | 0,000006 |
| 1417440_at   | Arid1a    | <b>AT rich interactive domain 1A (SWI-like)</b>                                                             | <b>-3,0</b> | 0,000000 |
| 1431214_at   | LOC67527  | <b>murine leukemia retrovirus</b>                                                                           | <b>-3,1</b> | 0,000000 |
| 1427385_s_at | Actn1     | <b>actinin, alpha 1</b>                                                                                     | <b>-3,1</b> | 0,000000 |
| 1445111_at   |           |                                                                                                             | <b>-3,1</b> | 0,000004 |
| 1423756_s_at | Igfbp4    | <b>insulin-like growth factor binding protein 4</b>                                                         | <b>-3,1</b> | 0,008142 |
| 1419313_at   | Ccnt1     | <b>cyclin T1</b>                                                                                            | <b>-3,2</b> | 0,000000 |
| 1449370_at   | Sox4      | <b>SRY-box containing gene 4</b>                                                                            | <b>-3,2</b> | 0,003259 |
| 1417229_at   | Capn1     | <b>calpain 1</b>                                                                                            | <b>-3,2</b> | 0,000000 |
| 1423060_at   | Pa2g4     | <b>proliferation-associated 2G4</b>                                                                         | <b>-3,2</b> | 0,000000 |
| 1450188_s_at | Lipg      | <b>lipase, endothelial</b>                                                                                  | <b>-3,2</b> | 0,000000 |
| 1437443_at   | EG620382  | <b>predicted gene, EG620382</b>                                                                             | <b>-3,2</b> | 0,000000 |
| 1460423_x_at | Igkv1-117 | <b>immunoglobulin kappa chain variable 1-117</b>                                                            | <b>-3,2</b> | 0,000431 |
| 1435664_at   | Zfp397    | <b>zinc finger protein 397</b>                                                                              | <b>-3,3</b> | 0,000011 |
| 1416239_at   | Ass1      | <b>argininosuccinate synthetase 1</b>                                                                       | <b>-3,3</b> | 0,000000 |
| 1415854_at   | Kitl      | <b>kit ligand</b>                                                                                           | <b>-3,3</b> | 0,000000 |
| 1449184_at   | Pglyrp1   | <b>peptidoglycan recognition protein 1</b>                                                                  | <b>-3,4</b> | 0,000000 |
| 1446595_at   | Itns2     | <b>intersectin 2</b>                                                                                        | <b>-3,5</b> | 0,000000 |
| 1424254_at   | Ifitm1    | <b>interferon induced transmembrane protein 1</b>                                                           | <b>-3,5</b> | 0,011034 |
| 1452415_at   | Actn1     | <b>actinin, alpha 1</b>                                                                                     | <b>-3,6</b> | 0,000000 |
| 1416521_at   | Sepw1     | <b>selenoprotein W, muscle 1</b>                                                                            | <b>-3,6</b> | 0,000000 |
| 1431213_a_at | LOC67527  | <b>murine leukemia retrovirus</b>                                                                           | <b>-3,7</b> | 0,000000 |
| 1459556_at   |           |                                                                                                             | <b>-3,8</b> | 0,000000 |
| 1419157_at   | Sox4      | <b>SRY-box containing gene 4</b>                                                                            | <b>-3,8</b> | 0,002579 |
| 1437479_x_at | Tbx3      | <b>T-box 3</b>                                                                                              | <b>-3,9</b> | 0,002979 |
| 1444258_at   |           |                                                                                                             | <b>-3,9</b> | 0,000000 |
| 1436780_at   | Ogt       | <b>O-linked N-acetylglucosamine (GlcNAc) transferase (UDP-N-acetylglucosamine:polypeptide-N-acetylglucc</b> | <b>-4,0</b> | 0,000000 |
| 1449552_at   | Zfr       | <b>zinc finger RNA binding protein</b>                                                                      | <b>-4,1</b> | 0,000000 |
| 1458617_at   | Prkcbp1   | <b>protein kinase C binding protein 1</b>                                                                   | <b>-4,5</b> | 0,000003 |
| 1426936_at   | LOC215866 | <b>hypothetical protein LOC215866</b>                                                                       | <b>-4,7</b> | 0,000698 |
| 1442626_at   |           |                                                                                                             | <b>-4,8</b> | 0,000000 |
| 1418078_at   | Psme3     | <b>proteasome (prosome, macropain) 28 subunit, 3</b>                                                        | <b>-5,3</b> | 0,000000 |

List of differentially expressed genes assessed using the limma package from Bioconductor (Fold change>1.5 and adjusted p-value<0.05)
